# Supplementary material for: A Spectroscopic Validation of the Improved Lennard–Jones Model
Source: MDPI journal article supplement (doi:10.3390/molecules26133906), 2021-06-26
Supplement: s1 [file s1]

## Supplementary Materials: A spectroscopic validation of the Improved Lennard-Jones model

Rhuiago Mendes de Oliveira<sup>1</sup>, Luiz Guilherme Machado de Macedo<sup>2</sup>, Thiago Ferreira da Cunha<sup>3</sup>, Fernando Pirani<sup>4</sup>, and Ricardo Gargano<sup>5,\*</sup>

Table S1: He<sub>2</sub> electronic energies (in Hartree) calculated at CCSD(T)/aug-cc-pV4Z (CCSD(T)-4Z), CCSD(T)/aug-cc-pV5Z (CCSD(T)-5Z), and CCSD(T)/CBS levels.

| R(Å) | CCSD(T)-4Z    | SCF-4Z        | CCSD(T)-5Z    | SCF-5Z        | CBS           |
|------|---------------|---------------|---------------|---------------|---------------|
| 2.00 | -5.8033189597 | -5.7207745338 | -5.8046755184 | -5.7209829996 | -5.8059816783 |
| 2.10 | -5.8040164346 | -5.7215845688 | -5.8053685586 | -5.7217930053 | -5.8066700821 |
| 2.20 | -5.8044528490 | -5.7221084119 | -5.8058013855 | -5.7223170000 | -5.8070990601 |
| 2.30 | -5.8047224658 | -5.7224460207 | -5.8060680255 | -5.7226548959 | -5.8073624156 |
| 2.40 | -5.8048864130 | -5.7226629979 | -5.8062294864 | -5.7228721004 | -5.8075211402 |
| 2.50 | -5.8049840425 | -5.7228021569 | -5.8063250417 | -5.7230112554 | -5.8076145214 |
| 2.60 | -5.8050405004 | -5.7228912296 | -5.8063798134 | -5.7231001078 | -5.8076676478 |
| 2.70 | -5.8050717326 | -5.7229480610 | -5.8064097098 | -5.7231566864 | -5.8076962848 |
| 2.80 | -5.8050877661 | -5.7229841159 | -5.8064247135 | -5.7231926571 | -5.8077102554 |
| 2.90 | -5.8050948472 | -5.7230067994 | -5.8064310192 | -5.7232155063 | -5.8077156544 |
| 2.91 | -5.8050952267 | -5.7230085348 | -5.8064313328 | -5.7232172705 | -5.8077158827 |
| 2.92 | -5.8050955586 | -5.7230101899 | -5.8064316007 | -5.7232189562 | -5.8077160662 |
| 2.93 | -5.8050958465 | -5.7230117681 | -5.8064318268 | -5.7232205666 | -5.8077162094 |
| 2.94 | -5.8050960926 | -5.7230132730 | -5.8064320131 | -5.7232221053 | -5.8077163140 |
| 2.95 | -5.8050962995 | -5.7230147078 | -5.8064321619 | -5.7232235752 | -5.8077163822 |
| 2.96 | -5.8050964694 | -5.7230160756 | -5.8064322756 | -5.7232249794 | -5.8077164164 |
| 2.97 | -5.8050966046 | -5.7230173796 | -5.8064323563 | -5.7232263208 | -5.8077164189 |
| 2.98 | -5.8050967071 | -5.7230186226 | -5.8064324060 | -5.7232276021 | -5.8077163916 |
| 2.99 | -5.8050967790 | -5.7230198074 | -5.8064324267 | -5.7232288260 | -5.8077163367 |
| 3.00 | -5.8050968222 | -5.7230209367 | -5.8064324202 | -5.7232299949 | -5.8077162559 |
| 3.01 | -5.8050968384 | -5.7230220129 | -5.8064323884 | -5.7232311112 | -5.8077161511 |
| 3.02 | -5.8050968294 | -5.7230230386 | -5.8064323328 | -5.7232321772 | -5.8077160240 |
| 3.03 | -5.8050967967 | -5.7230240161 | -5.8064322550 | -5.7232331952 | -5.8077158762 |
| 3.04 | -5.8050967420 | -5.7230249476 | -5.8064321566 | -5.7232341671 | -5.8077157093 |
| 3.05 | -5.8050966667 | -5.7230258353 | -5.8064320390 | -5.7232350951 | -5.8077155246 |
| 3.06 | -5.8050965721 | -5.7230266812 | -5.8064319035 | -5.7232359810 | -5.8077153237 |
| 3.07 | -5.8050964597 | -5.7230274874 | -5.8064317514 | -5.7232368266 | -5.8077151077 |
| 3.08 | -5.8050963305 | -5.7230282555 | -5.8064315839 | -5.7232376338 | -5.8077148781 |
| 3.09 | -5.8050961859 | -5.7230289876 | -5.8064314021 | -2.8616273298 | -7.4153487627 |
| 3.10 | -5.8050960268 | -5.7230296852 | -5.8064312076 | -5.7232384041 | -5.8077147962 |
| 3.20 | -5.8050938545 | -5.7230350966 | -5.8064287330 | -5.7232448612 | -5.8077114169 |
| 3.30 | -5.8050911162 | -5.7230384757 | -5.8064257761 | -5.7232484011 | -5.8077081403 |
| 3.40 | -5.8050882652 | -5.7230406257 | -5.8064227672 | -5.7232505679 | -5.8077049563 |
| 3.50 | -5.8050855423 | -5.7230420235 | -5.8064199288 | -5.7232518886 | -5.8077020402 |
| 3.60 | -5.8050830607 | -5.7230429441 | -5.8064173623 | -5.7232526998 | -5.8076994459 |
| 3.70 | -5.8050808630 | -5.7230435461 | -5.8064150996 | -5.7232532093 | -5.8076971669 |
| 3.80 | -5.8050789506 | -5.7230439257 | -5.8064131368 | -5.7232535397 | -5.8076951790 |
| 3.90 | -5.8050773043 | -5.7230441473 | -5.8064114510 | -5.7232537597 | -5.8076934527 |
| 4.00 | -5.8050758966 | -5.7230442583 | -5.8064100120 | -5.7232539071 | -5.8076919603 |
| 4.10 | -5.8050746973 | -5.7230442959 | -5.8064087876 | -5.7232540031 | -5.8076906767 |
| 4.20 | -5.8050736773 | -5.7230442887 | -5.8064077474 | -5.7232540611 | -5.8076895787 |
| 4.30 | -5.8050728099 | -5.7230442579 | -5.8064068637 | -5.7232540908 | -5.8076886440 |
| 4.40 | -5.8050720716 | -5.7230442178 | -5.8064061123 | -5.7232541003 | -5.8076878510 |

|      |               |               |               |               |               |
|------|---------------|---------------|---------------|---------------|---------------|
| 4.50 | -5.8050714421 | -5.7230441774 | -5.8064054723 | -5.7232540964 | -5.8076871795 |
| 4.60 | -5.8050709044 | -5.7230441412 | -5.8064049261 | -5.7232540846 | -5.8076866106 |
| 4.70 | -5.8050704439 | -5.7230441110 | -5.8064044603 | -5.7232540691 | -5.8076861309 |
| 4.80 | -5.8050700484 | -5.7230440868 | -5.8064040578 | -5.7232540527 | -5.8076857167 |
| 4.90 | -5.8050697080 | -5.7230440679 | -5.8064037128 | -5.7232540372 | -5.8076853651 |
| 5.00 | -5.8050694140 | -5.7230440531 | -5.8064034152 | -5.7232540235 | -5.8076850631 |
| 5.10 | -5.8050691595 | -5.7230440415 | -5.8064031577 | -5.7232540117 | -5.8076848026 |
| 5.20 | -5.8050689385 | -5.7230440322 | -5.8064029343 | -5.7232540020 | -5.8076845769 |
| 5.30 | -5.8050687461 | -5.7230440246 | -5.8064027400 | -5.7232539941 | -5.8076843806 |
| 5.40 | -5.8050685782 | -5.7230440183 | -5.8064025711 | -5.7232539876 | -5.8076842107 |
| 5.50 | -5.8050684313 | -5.7230440129 | -5.8064024227 | -5.7232539823 | -5.8076840608 |
| 5.60 | -5.8050683023 | -5.7230440084 | -5.8064022920 | -5.7232539779 | -5.8076839284 |
| 5.70 | -5.8050681890 | -5.7230440047 | -5.8064021777 | -5.7232539743 | -5.8076838130 |
| 5.80 | -5.8050680890 | -5.7230440015 | -5.8064020773 | -5.7232539712 | -5.8076837120 |
| 5.90 | -5.8050680007 | -5.7230439990 | -5.8064019880 | -5.7232539687 | -5.8076836217 |
| 6.00 | -5.8050679225 | -5.7230439970 | -5.8064019093 | -5.7232539666 | -5.8076835424 |
| 6.10 | -5.8050678531 | -5.7230439954 | -5.8064018394 | -5.7232539648 | -5.8076834721 |
| 6.20 | -5.8050677914 | -5.7230439942 | -5.8064017773 | -5.7232539634 | -5.8076834098 |
| 6.30 | -5.8050677365 | -5.7230439932 | -5.8064017220 | -5.7232539622 | -5.8076833542 |
| 6.40 | -5.8050676874 | -5.7230439926 | -5.8064016727 | -5.7232539613 | -5.8076833048 |
| 6.50 | -5.8050676435 | -5.7230439921 | -5.8064016286 | -5.7232539605 | -5.8076832606 |
| 6.60 | -5.8050676042 | -5.7230439918 | -5.8064015891 | -5.7232539599 | -5.8076832210 |
| 6.70 | -5.8050675690 | -5.7230439916 | -5.8064015536 | -5.7232539595 | -5.8076831855 |
| 6.80 | -5.8050675372 | -5.7230439915 | -5.8064015217 | -5.7232539591 | -5.8076831536 |
| 6.90 | -5.8050675087 | -5.7230439914 | -5.8064014931 | -5.7232539589 | -5.8076831249 |
| 7.00 | -5.8050674829 | -5.7230439914 | -5.8064014672 | -5.7232539587 | -5.8076830990 |
| 7.10 | -5.8050674597 | -5.7230439914 | -5.8064014438 | -5.7232539586 | -5.8076830756 |
| 7.20 | -5.8050674386 | -5.7230439914 | -5.8064014227 | -5.7232539585 | -5.8076830545 |
| 7.30 | -5.8050674196 | -5.7230439913 | -5.8064014036 | -5.7232539584 | -5.8076830353 |
| 7.40 | -5.8050674023 | -5.7230439913 | -5.8064013863 | -5.7232539584 | -5.8076830179 |
| 7.50 | -5.8050673866 | -5.7230439913 | -5.8064013705 | -5.7232539583 | -5.8076830021 |
| 7.60 | -5.8050673723 | -5.7230439913 | -5.8064013562 | -5.7232539583 | -5.8076829877 |
| 7.70 | -5.8050673593 | -5.7230439913 | -5.8064013431 | -5.7232539583 | -5.8076829746 |
| 7.80 | -5.8050673474 | -5.7230439913 | -5.8064013312 | -5.7232539583 | -5.8076829627 |
| 7.90 | -5.8050673366 | -5.7230439913 | -5.8064013204 | -5.7232539583 | -5.8076829518 |
| 8.00 | -5.8050673267 | -5.7230439913 | -5.8064013104 | -5.7232539583 | -5.8076829418 |
| 8.10 | -5.8050673177 | -5.7230439913 | -5.8064013014 | -5.7232539583 | -5.8076829327 |
| 8.20 | -5.8050673094 | -5.7230439913 | -5.8064012930 | -5.7232539583 | -5.8076829244 |
| 8.30 | -5.8050673017 | -5.7230439913 | -5.8064012854 | -5.7232539583 | -5.8076829167 |
| 8.40 | -5.8050672948 | -5.7230439913 | -5.8064012784 | -5.7232539583 | -5.8076829097 |
| 8.50 | -5.8050672883 | -5.7230439913 | -5.8064012720 | -5.7232539583 | -5.8076829033 |
| 8.60 | -5.8050672824 | -5.7230439913 | -5.8064012660 | -5.7232539583 | -5.8076828973 |
| 8.70 | -5.8050672770 | -5.7230439913 | -5.8064012606 | -5.7232539583 | -5.8076828919 |
| 8.80 | -5.8050672720 | -5.7230439913 | -5.8064012556 | -5.7232539583 | -5.8076828868 |
| 8.90 | -5.8050672673 | -5.7230439913 | -5.8064012509 | -5.7232539583 | -5.8076828822 |
| 9.00 | -5.8050672631 | -5.7230439913 | -5.8064012467 | -5.7232539583 | -5.8076828779 |
| 9.10 | -5.8050672591 | -5.7230439913 | -5.8064012427 | -5.7232539583 | -5.8076828739 |
| 9.20 | -5.8050672555 | -5.7230439913 | -5.8064012390 | -5.7232539583 | -5.8076828703 |
| 9.30 | -5.8050672521 | -5.7230439913 | -5.8064012356 | -5.7232539583 | -5.8076828669 |
| 9.40 | -5.8050672489 | -5.7230439913 | -5.8064012325 | -5.7232539583 | -5.8076828637 |
| 9.50 | -5.8050672460 | -5.7230439913 | -5.8064012296 | -5.7232539583 | -5.8076828608 |
| 9.60 | -5.8050672433 | -5.7230439913 | -5.8064012269 | -5.7232539583 | -5.8076828581 |
| 9.70 | -5.8050672408 | -5.7230439913 | -5.8064012244 | -5.7232539583 | -5.8076828556 |
| 9.80 | -5.8050672385 | -5.7230439913 | -5.8064012220 | -5.7232539583 | -5.8076828533 |

|       |               |               |               |               |               |
|-------|---------------|---------------|---------------|---------------|---------------|
| 9.90  | -5.8050672363 | -5.7230439913 | -5.8064012199 | -5.7232539583 | -5.8076828511 |
| 10.00 | -5.8050672343 | -5.7230439913 | -5.8064012178 | -5.7232539583 | -5.8076828490 |
| 10.10 | -5.8050672324 | -5.7230439913 | -5.8064012160 | -5.7232539583 | -5.8076828471 |
| 10.20 | -5.8050672306 | -5.7230439913 | -5.8064012142 | -5.7232539583 | -5.8076828454 |
| 10.30 | -5.8050672290 | -5.7230439913 | -5.8064012126 | -5.7232539583 | -5.8076828438 |
| 10.40 | -5.8050672275 | -5.7230439913 | -5.8064012110 | -5.7232539583 | -5.8076828422 |
| 10.50 | -5.8050672260 | -5.7230439913 | -5.8064012096 | -5.7232539583 | -5.8076828408 |
| 10.60 | -5.8050672247 | -5.7230439913 | -5.8064012083 | -5.7232539583 | -5.8076828395 |
| 10.70 | -5.8050672234 | -5.7230439913 | -5.8064012070 | -5.7232539583 | -5.8076828382 |
| 10.80 | -5.8050672223 | -5.7230439913 | -5.8064012058 | -5.7232539583 | -5.8076828370 |
| 10.90 | -5.8050672212 | -5.7230439913 | -5.8064012047 | -5.7232539583 | -5.8076828359 |
| 11.00 | -5.8050672202 | -5.7230439913 | -5.8064012037 | -5.7232539583 | -5.8076828349 |
| 11.10 | -5.8050672192 | -5.7230439913 | -5.8064012027 | -5.7232539583 | -5.8076828339 |
| 11.20 | -5.8050672183 | -5.7230439913 | -5.8064012018 | -5.7232539583 | -5.8076828331 |
| 11.30 | -5.8050672174 | -5.7230439913 | -5.8064012010 | -5.7232539583 | -5.8076828322 |
| 11.40 | -5.8050672166 | -5.7230439913 | -5.8064012002 | -5.7232539583 | -5.8076828314 |
| 11.50 | -5.8050672159 | -5.7230439913 | -5.8064011994 | -5.7232539583 | -5.8076828306 |
| 11.60 | -5.8050672152 | -5.7230439913 | -5.8064011987 | -5.7232539583 | -5.8076828299 |
| 11.70 | -5.8050672145 | -5.7230439913 | -5.8064011981 | -5.7232539583 | -5.8076828293 |
| 11.80 | -5.8050672139 | -5.7230439913 | -5.8064011974 | -5.7232539583 | -5.8076828286 |
| 11.90 | -5.8050672133 | -5.7230439913 | -5.8064011968 | -5.7232539583 | -5.8076828281 |

Table S2: He-Ne electronic energies (in hartree) calculated at CCSD(T)/aug-cc-pV4Z (CCSD(T)-4Z), CCSD(T)/aug-cc-pV5Z (CCSD(T)-5Z), and CCSD(T)/CBS levels.

| R(Å) | CCSD(T)-4Z      | SCF-4Z          | CCSD(T)-5Z      | SCF-5Z          | CBS             |
|------|-----------------|-----------------|-----------------|-----------------|-----------------|
| 2.00 | -131.7455729475 | -131.3999545480 | -131.7586952802 | -131.4030546790 | -131.7707213404 |
| 2.10 | -131.7473055782 | -131.4018769490 | -131.7604120412 | -131.4049800580 | -131.7724197783 |
| 2.20 | -131.7483937939 | -131.4031139600 | -131.7614870695 | -131.4062185070 | -131.7734801627 |
| 2.30 | -131.7490705522 | -131.4039081660 | -131.7621529526 | -131.4070133620 | -131.7741342713 |
| 2.40 | -131.7494861673 | -131.4044162150 | -131.7625597473 | -131.4075224240 | -131.7745312426 |
| 2.50 | -131.7497372058 | -131.4047391420 | -131.7628037912 | -131.4078476560 | -131.7747666530 |
| 2.60 | -131.7498854056 | -131.4049425470 | -131.7629465689 | -131.4080548630 | -131.7749016059 |
| 2.70 | -131.7499700188 | -131.4050694910 | -131.7630270690 | -131.4081865570 | -131.7749751222 |
| 2.80 | -131.7500158447 | -131.4051483400 | -131.7630698207 | -131.4082701590 | -131.7750119783 |
| 2.90 | -131.7500384318 | -131.4051975260 | -131.7630901336 | -131.4083232260 | -131.7750277248 |
| 3.00 | -131.7500474504 | -131.4052286440 | -131.7630974665 | -131.4083568920 | -131.7750318577 |
| 3.01 | -131.7500478479 | -131.4052310610 | -131.7630977303 | -131.4083594870 | -131.7750318813 |
| 3.02 | -131.7500481841 | -131.4052333760 | -131.7630979295 | -131.4083619670 | -131.7750318439 |
| 3.03 | -131.7500484549 | -131.4052355910 | -131.7630980669 | -131.4083643350 | -131.7750317554 |
| 3.04 | -131.7500486637 | -131.4052377130 | -131.7630981461 | -131.4083665960 | -131.7750316207 |
| 3.05 | -131.7500488140 | -131.4052397450 | -131.7630981709 | -131.4083687550 | -131.7750314424 |
| 3.06 | -131.7500489097 | -131.4052416910 | -131.7630981447 | -131.4083708170 | -131.7750312231 |
| 3.07 | -131.7500489540 | -131.4052435560 | -131.7630980708 | -131.4083727860 | -131.7750309667 |
| 3.08 | -131.7500489503 | -131.4052453420 | -131.7630979522 | -131.4083746650 | -131.7750306754 |
| 3.09 | -131.7500489015 | -131.4052470540 | -131.7630977920 | -131.4083764590 | -131.7750303522 |
| 3.10 | -131.7500488106 | -131.4052486940 | -131.7630975929 | -131.4083781710 | -131.7750299991 |
| 3.11 | -131.7500486804 | -131.4052502650 | -131.7630973576 | -131.4083798050 | -131.7750296182 |
| 3.12 | -131.7500485136 | -131.4052517710 | -131.7630970886 | -131.4083813640 | -131.7750292123 |
| 3.13 | -131.7500483125 | -131.4052532140 | -131.7630967884 | -131.4083828520 | -131.7750287827 |
| 3.14 | -131.7500480795 | -131.4052545970 | -131.7630964591 | -131.4083842710 | -131.7750283321 |
| 3.15 | -131.7500478170 | -131.4052559210 | -131.7630961029 | -131.4083856250 | -131.7750278608 |
| 3.16 | -131.7500475270 | -131.4052571910 | -131.7630957218 | -131.4083869170 | -131.7750273718 |
| 3.17 | -131.7500472115 | -131.4052584070 | -131.7630953178 | -131.4083881480 | -131.7750268665 |

|      |                 |                 |                 |                 |                 |
|------|-----------------|-----------------|-----------------|-----------------|-----------------|
| 3.18 | -131.7500468725 | -131.4052595720 | -131.7630948927 | -131.4083893230 | -131.7750263455 |
| 3.19 | -131.7500465117 | -131.4052606880 | -131.7630944482 | -131.4083904420 | -131.7750258115 |
| 3.20 | -131.7500461303 | -131.4052617560 | -131.7630939865 | -131.4083915100 | -131.7750252654 |
| 3.30 | -131.7500415358 | -131.4052701970 | -131.7630886859 | -131.4083997680 | -131.7750193269 |
| 3.40 | -131.7500362550 | -131.4052754540 | -131.7630828612 | -131.4084048160 | -131.7750130490 |
| 3.50 | -131.7500309644 | -131.4052784910 | -131.7630771366 | -131.4084078760 | -131.7750068561 |
| 3.60 | -131.7500260100 | -131.4052800160 | -131.7630718362 | -131.4084097370 | -131.7750010038 |
| 3.70 | -131.7500215462 | -131.4052805700 | -131.7630670915 | -131.4084108890 | -131.7749956285 |
| 3.80 | -131.7500176157 | -131.4052805610 | -131.7630629190 | -131.4084116200 | -131.7749907864 |
| 3.90 | -131.7500142050 | -131.4052802710 | -131.7630593394 | -131.4084120930 | -131.7749866011 |
| 4.00 | -131.7500112712 | -131.4052798840 | -131.7630562552 | -131.4084123980 | -131.7749829702 |
| 4.10 | -131.7500087615 | -131.4052795000 | -131.7630536238 | -131.4084125820 | -131.7749798919 |
| 4.20 | -131.7500066202 | -131.4052791670 | -131.7630513853 | -131.4084126800 | -131.7749773094 |
| 4.30 | -131.7500047950 | -131.4052788970 | -131.7630494811 | -131.4084127130 | -131.7749751522 |
| 4.40 | -131.7500032390 | -131.4052786870 | -131.7630478620 | -131.4084127040 | -131.7749733539 |
| 4.50 | -131.7500019021 | -131.4052785240 | -131.7630464833 | -131.4084126670 | -131.7749718606 |
| 4.60 | -131.7500007761 | -131.4052783960 | -131.7630453073 | -131.4084126170 | -131.7749705882 |
| 4.70 | -131.7499998039 | -131.4052782930 | -131.7630443018 | -131.4084125620 | -131.7749695207 |
| 4.80 | -131.7499989690 | -131.4052782070 | -131.7630434395 | -131.4084125100 | -131.7749686108 |
| 4.90 | -131.7499982505 | -131.4052781340 | -131.7630426987 | -131.4084124630 | -131.7749678319 |
| 5.00 | -131.7499976303 | -131.4052780710 | -131.7630420601 | -131.4084124230 | -131.7749671611 |
| 5.10 | -131.7499970936 | -131.4052780170 | -131.7630415082 | -131.4084123890 | -131.7749665820 |
| 5.20 | -131.7499966282 | -131.4052779700 | -131.7630410300 | -131.4084123610 | -131.7749660798 |
| 5.30 | -131.7499962228 | -131.4052779300 | -131.7630406141 | -131.4084123370 | -131.7749656437 |
| 5.40 | -131.7499958694 | -131.4052778970 | -131.7630402518 | -131.4084123180 | -131.7749652643 |
| 5.50 | -131.7499955603 | -131.4052778710 | -131.7630399351 | -131.4084123010 | -131.7749649346 |
| 5.60 | -131.7499952893 | -131.4052778500 | -131.7630396578 | -131.4084122860 | -131.7749646471 |
| 5.70 | -131.7499950512 | -131.4052778330 | -131.7630394143 | -131.4084122740 | -131.7749643953 |
| 5.80 | -131.7499948413 | -131.4052778210 | -131.7630391997 | -131.4084122630 | -131.7749641751 |
| 5.90 | -131.7499946560 | -131.4052778110 | -131.7630390105 | -131.4084122540 | -131.7749639812 |
| 6.00 | -131.7499944921 | -131.4052778050 | -131.7630388430 | -131.4084122470 | -131.7749638107 |
| 6.10 | -131.7499943467 | -131.4052778000 | -131.7630386947 | -131.4084122400 | -131.7749636604 |
| 6.20 | -131.7499942175 | -131.4052777970 | -131.7630385631 | -131.4084122350 | -131.7749635273 |
| 6.30 | -131.7499941023 | -131.4052777940 | -131.7630384456 | -131.4084122310 | -131.7749634080 |
| 6.40 | -131.7499940001 | -131.4052777930 | -131.7630383410 | -131.4084122270 | -131.7749633027 |
| 6.50 | -131.7499939079 | -131.4052777920 | -131.7630382475 | -131.4084122250 | -131.7749632084 |
| 6.60 | -131.7499938257 | -131.4052777910 | -131.7630381639 | -131.4084122220 | -131.7749631243 |
| 6.70 | -131.7499937521 | -131.4052777910 | -131.7630380890 | -131.4084122210 | -131.7749630488 |
| 6.80 | -131.7499936857 | -131.4052777910 | -131.7630380215 | -131.4084122200 | -131.7749629805 |
| 6.90 | -131.7499936260 | -131.4052777900 | -131.7630379609 | -131.4084122190 | -131.7749629190 |
| 7.00 | -131.7499935722 | -131.4052777900 | -131.7630379062 | -131.4084122180 | -131.7749628639 |
| 7.10 | -131.7499935238 | -131.4052777900 | -131.7630378569 | -131.4084122180 | -131.7749628137 |
| 7.20 | -131.7499934799 | -131.4052777900 | -131.7630378125 | -131.4084122170 | -131.7749627692 |
| 7.30 | -131.7499934400 | -131.4052777900 | -131.7630377719 | -131.4084122170 | -131.7749627280 |
| 7.40 | -131.7499934040 | -131.4052777900 | -131.7630377354 | -131.4084122170 | -131.7749626909 |
| 7.50 | -131.7499933712 | -131.4052777900 | -131.7630377021 | -131.4084122170 | -131.7749626572 |
| 7.60 | -131.7499933415 | -131.4052777900 | -131.7630376719 | -131.4084122170 | -131.7749626265 |
| 7.70 | -131.7499933144 | -131.4052777900 | -131.7630376446 | -131.4084122170 | -131.7749625989 |
| 7.80 | -131.7499932896 | -131.4052777900 | -131.7630376193 | -131.4084122170 | -131.7749625732 |
| 7.90 | -131.7499932670 | -131.4052777900 | -131.7630375965 | -131.4084122170 | -131.7749625501 |
| 8.00 | -131.7499932464 | -131.4052777900 | -131.7630375756 | -131.4084122170 | -131.7749625288 |
| 8.10 | -131.7499932276 | -131.4052777900 | -131.7630375565 | -131.4084122170 | -131.7749625094 |
| 8.20 | -131.7499932102 | -131.4052777900 | -131.7630375391 | -131.4084122170 | -131.7749624921 |
| 8.30 | -131.7499931945 | -131.4052777900 | -131.7630375229 | -131.4084122170 | -131.7749624754 |

|       |                 |                 |                 |                 |                 |
|-------|-----------------|-----------------|-----------------|-----------------|-----------------|
| 8.40  | -131.7499931799 | -131.4052777900 | -131.7630375082 | -131.4084122170 | -131.7749624606 |
| 8.50  | -131.7499931665 | -131.4052777900 | -131.7630374947 | -131.4084122170 | -131.7749624468 |
| 8.60  | -131.7499931543 | -131.4052777900 | -131.7630374822 | -131.4084122170 | -131.7749624342 |
| 8.70  | -131.7499931428 | -131.4052777900 | -131.7630374709 | -131.4084122170 | -131.7749624230 |
| 8.80  | -131.7499931325 | -131.4052777900 | -131.7630374602 | -131.4084122170 | -131.7749624119 |
| 8.90  | -131.7499931228 | -131.4052777900 | -131.7630374505 | -131.4084122170 | -131.7749624022 |
| 9.00  | -131.7499931139 | -131.4052777900 | -131.7630374415 | -131.4084122170 | -131.7749623930 |
| 9.10  | -131.7499931057 | -131.4052777900 | -131.7630374332 | -131.4084122170 | -131.7749623846 |
| 9.20  | -131.7499930981 | -131.4052777900 | -131.7630374255 | -131.4084122170 | -131.7749623768 |
| 9.30  | -131.7499930911 | -131.4052777900 | -131.7630374184 | -131.4084122170 | -131.7749623696 |
| 9.40  | -131.7499930846 | -131.4052777900 | -131.7630374118 | -131.4084122170 | -131.7749623630 |
| 9.50  | -131.7499930785 | -131.4052777900 | -131.7630374057 | -131.4084122170 | -131.7749623568 |
| 9.60  | -131.7499930729 | -131.4052777900 | -131.7630374000 | -131.4084122170 | -131.7749623510 |
| 9.70  | -131.7499930677 | -131.4052777900 | -131.7630373947 | -131.4084122170 | -131.7749623457 |
| 9.80  | -131.7499930628 | -131.4052777900 | -131.7630373898 | -131.4084122170 | -131.7749623408 |
| 9.90  | -131.7499930583 | -131.4052777900 | -131.7630373853 | -131.4084122170 | -131.7749623362 |
| 10.00 | -131.7499930542 | -131.4052777900 | -131.7630373810 | -131.4084122170 | -131.7749623318 |
| 10.10 | -131.7499930501 | -131.4052777900 | -131.7630373772 | -131.4084122170 | -131.7749623283 |
| 10.20 | -131.7499930466 | -131.4052777900 | -131.7630373734 | -131.4084122170 | -131.7749623241 |
| 10.30 | -131.7499930431 | -131.4052777900 | -131.7630373700 | -131.4084122170 | -131.7749623208 |
| 10.40 | -131.7499930400 | -131.4052777900 | -131.7630373667 | -131.4084122170 | -131.7749623174 |
| 10.50 | -131.7499930370 | -131.4052777900 | -131.7630373637 | -131.4084122170 | -131.7749623144 |
| 10.60 | -131.7499930342 | -131.4052777900 | -131.7630373609 | -131.4084122170 | -131.7749623116 |
| 10.70 | -131.7499930316 | -131.4052777900 | -131.7630373583 | -131.4084122170 | -131.7749623089 |
| 10.80 | -131.7499930292 | -131.4052777900 | -131.7630373558 | -131.4084122170 | -131.7749623065 |
| 10.90 | -131.7499930269 | -131.4052777900 | -131.7630373535 | -131.4084122170 | -131.7749623041 |
| 11.00 | -131.7499930248 | -131.4052777900 | -131.7630373514 | -131.4084122170 | -131.7749623020 |
| 11.10 | -131.7499930228 | -131.4052777900 | -131.7630373494 | -131.4084122170 | -131.7749622999 |
| 11.20 | -131.7499930209 | -131.4052777900 | -131.7630373475 | -131.4084122170 | -131.7749622980 |
| 11.30 | -131.7499930191 | -131.4052777900 | -131.7630373457 | -131.4084122170 | -131.7749622962 |
| 11.40 | -131.7499930175 | -131.4052777900 | -131.7630373440 | -131.4084122170 | -131.7749622945 |
| 11.50 | -131.7499930159 | -131.4052777900 | -131.7630373424 | -131.4084122170 | -131.7749622929 |
| 11.60 | -131.7499930144 | -131.4052777900 | -131.7630373410 | -131.4084122170 | -131.7749622915 |
| 11.70 | -131.7499930131 | -131.4052777900 | -131.7630373396 | -131.4084122170 | -131.7749622901 |
| 11.80 | -131.7499930118 | -131.4052777900 | -131.7630373383 | -131.4084122170 | -131.7749622887 |
| 11.90 | -131.7499930105 | -131.4052777900 | -131.7630373370 | -131.4084122170 | -131.7749622875 |

Table S3: He-Ar electronic energies (in hartree) calculated at CCSD(T)/aug-cc-pV4Z (CCSD(T)-4Z), CCSD(T)/aug-cc-pV5Z (CCSD(T)-5Z), and CCSD(T)/CBS levels.

| R(Å) | CCSD(T)-4Z      | SCF-4Z          | CCSD(T)-5Z      | SCF-5Z          | CBS             |
|------|-----------------|-----------------|-----------------|-----------------|-----------------|
| 2.00 | -529.9549989866 | -529.6520310050 | -529.9642745230 | -529.6526937420 | -529.9736339121 |
| 2.10 | -529.9623943541 | -529.6601672940 | -529.9716153726 | -529.6608209870 | -529.9809226434 |
| 2.20 | -529.9674611891 | -529.6658242490 | -529.9766416682 | -529.6664729420 | -529.9859092149 |
| 2.30 | -529.9709095666 | -529.6697428880 | -529.9800597727 | -529.6703889950 | -529.9892970103 |
| 2.40 | -529.9732399704 | -529.6724483660 | -529.9823674431 | -529.6730933250 | -529.9915814741 |
| 2.50 | -529.9748028136 | -529.6743106990 | -529.9839130943 | -529.6749552670 | -529.9931093075 |
| 2.60 | -529.9758419312 | -529.6755892150 | -529.9849391005 | -529.6762336650 | -529.9941216237 |
| 2.70 | -529.9765259992 | -529.6764647740 | -529.9856130653 | -529.6771091280 | -529.9947850425 |
| 2.80 | -529.9769710072 | -529.6770629820 | -529.9860501844 | -529.6777072330 | -529.9952139425 |
| 2.90 | -529.9772562513 | -529.6774707940 | -529.9863291896 | -529.6781150060 | -529.9954864239 |
| 3.00 | -529.9774355963 | -529.6777482570 | -529.9865035523 | -529.6783925180 | -529.9956555318 |
| 3.10 | -529.9775453958 | -529.6779367190 | -529.9866093509 | -529.6785810700 | -529.9957570821 |
| 3.20 | -529.9776100307 | -529.6780645450 | -529.9866707583 | -529.6787089650 | -529.9958150645 |

|      |                 |                 |                 |                 |                 |
|------|-----------------|-----------------|-----------------|-----------------|-----------------|
| 3.30 | -529.9776457258 | -529.6781511060 | -529.9867038506 | -529.6787955690 | -529.9958454019 |
| 3.40 | -529.9776632046 | -529.6782095850 | -529.9867192333 | -529.6788541230 | -529.9958585433 |
| 3.41 | -529.9776642470 | -529.6782142620 | -529.9867200895 | -529.6788588120 | -529.9958591974 |
| 3.42 | -529.9776651835 | -529.6782187580 | -529.9867208447 | -529.6788633210 | -529.9958597549 |
| 3.43 | -529.9776660208 | -529.6782230780 | -529.9867215045 | -529.6788676560 | -529.9958602202 |
| 3.44 | -529.9776667637 | -529.6782272310 | -529.9867220739 | -529.6788718230 | -529.9958605996 |
| 3.45 | -529.9776674171 | -529.6782312210 | -529.9867225575 | -529.6788758300 | -529.9958608956 |
| 3.46 | -529.9776679854 | -529.6782350560 | -529.9867229599 | -529.6788796830 | -529.9958611137 |
| 3.47 | -529.9776684731 | -529.6782387410 | -529.9867232853 | -529.6788833870 | -529.9958612581 |
| 3.48 | -529.9776688844 | -529.6782422820 | -529.9867235377 | -529.6788869480 | -529.9958613328 |
| 3.49 | -529.9776692231 | -529.6782456840 | -529.9867237212 | -529.6788903720 | -529.9958613411 |
| 3.50 | -529.9776694932 | -529.6782489530 | -529.9867238395 | -529.6788936630 | -529.9958612878 |
| 3.51 | -529.9776696982 | -529.6782520930 | -529.9867238962 | -529.6788968280 | -529.9958611747 |
| 3.52 | -529.9776698418 | -529.6782551100 | -529.9867238946 | -529.6788998700 | -529.9958610069 |
| 3.53 | -529.9776699271 | -529.6782580080 | -529.9867238381 | -529.6789027950 | -529.9958607864 |
| 3.54 | -529.9776699574 | -529.6782607920 | -529.9867237298 | -529.6789056070 | -529.9958605168 |
| 3.55 | -529.9776699358 | -529.6782634660 | -529.9867235726 | -529.6789083100 | -529.9958602011 |
| 3.56 | -529.9776698651 | -529.6782660340 | -529.9867233694 | -529.6789109090 | -529.9958598415 |
| 3.57 | -529.9776697483 | -529.6782685010 | -529.9867231230 | -529.6789134070 | -529.9958594418 |
| 3.58 | -529.9776695878 | -529.6782708700 | -529.9867228360 | -529.6789158080 | -529.9958590040 |
| 3.59 | -529.9776693863 | -529.6782731450 | -529.9867225107 | -529.6789181170 | -529.9958585298 |
| 3.60 | -529.9776691450 | -529.6782753290 | -529.9867221490 | -529.6789203360 | -529.9958580220 |
| 3.70 | -529.9776650804 | -529.6782929080 | -529.9867170164 | -529.6789383040 | -529.9958515504 |
| 3.80 | -529.9776591377 | -529.6783045740 | -529.9867102295 | -529.6789503780 | -529.9958436486 |
| 3.90 | -529.9776524472 | -529.6783123020 | -529.9867028713 | -529.6789584580 | -529.9958353921 |
| 4.00 | -529.9776456813 | -529.6783174360 | -529.9866955776 | -529.6789638340 | -529.9958274087 |
| 4.10 | -529.9776392186 | -529.6783208720 | -529.9866886989 | -529.6789673880 | -529.9958200272 |
| 4.20 | -529.9776332565 | -529.6783231950 | -529.9866824042 | -529.6789697260 | -529.9958133751 |
| 4.30 | -529.9776278743 | -529.6783247800 | -529.9866767584 | -529.6789712630 | -529.9958074798 |
| 4.40 | -529.9776230871 | -529.6783258630 | -529.9866717601 | -529.6789722790 | -529.9958022976 |
| 4.50 | -529.9776188707 | -529.6783265940 | -529.9866673735 | -529.6789729600 | -529.9957977606 |
| 4.60 | -529.9776151814 | -529.6783270720 | -529.9866635453 | -529.6789734250 | -529.9957937938 |
| 4.70 | -529.9776119653 | -529.6783273650 | -529.9866602231 | -529.6789737470 | -529.9957903442 |
| 4.80 | -529.9776091693 | -529.6783275230 | -529.9866573312 | -529.6789739710 | -529.9957873145 |
| 4.90 | -529.9776067409 | -529.6783275850 | -529.9866548294 | -529.6789741240 | -529.9957846845 |
| 5.00 | -529.9776046320 | -529.6783275830 | -529.9866526608 | -529.6789742240 | -529.9957823959 |
| 5.10 | -529.9776028002 | -529.6783275410 | -529.9866507799 | -529.6789742840 | -529.9957804063 |
| 5.20 | -529.9776012058 | -529.6783274770 | -529.9866491467 | -529.6789743130 | -529.9957786800 |
| 5.30 | -529.9775998176 | -529.6783274030 | -529.9866477263 | -529.6789743210 | -529.9957771798 |
| 5.40 | -529.9775986062 | -529.6783273280 | -529.9866464887 | -529.6789743130 | -529.9957758771 |
| 5.50 | -529.9775975470 | -529.6783272580 | -529.9866454082 | -529.6789742950 | -529.9957747452 |
| 5.60 | -529.9775966205 | -529.6783271940 | -529.9866444629 | -529.6789742720 | -529.9957737571 |
| 5.70 | -529.9775958055 | -529.6783271370 | -529.9866436343 | -529.6789742480 | -529.9957728956 |
| 5.80 | -529.9775950896 | -529.6783270880 | -529.9866429061 | -529.6789742220 | -529.9957721417 |
| 5.90 | -529.9775944585 | -529.6783270460 | -529.9866422649 | -529.6789741990 | -529.9957714791 |
| 6.00 | -529.9775939011 | -529.6783270090 | -529.9866416989 | -529.6789741770 | -529.9957708957 |
| 6.10 | -529.9775934085 | -529.6783269780 | -529.9866411982 | -529.6789741570 | -529.9957703803 |
| 6.20 | -529.9775929700 | -529.6783269510 | -529.9866407547 | -529.6789741390 | -529.9957699264 |
| 6.30 | -529.9775925810 | -529.6783269280 | -529.9866403606 | -529.6789741240 | -529.9957695225 |
| 6.40 | -529.9775922346 | -529.6783269080 | -529.9866400099 | -529.6789741100 | -529.9957691638 |
| 6.50 | -529.9775919256 | -529.6783268910 | -529.9866396971 | -529.6789740980 | -529.9957688444 |
| 6.60 | -529.9775916501 | -529.6783268770 | -529.9866394176 | -529.6789740880 | -529.9957685584 |
| 6.70 | -529.9775914019 | -529.6783268650 | -529.9866391676 | -529.6789740790 | -529.9957683049 |
| 6.80 | -529.9775911799 | -529.6783268550 | -529.9866389433 | -529.6789740710 | -529.9957680771 |

|       |                 |                 |                 |                 |                 |
|-------|-----------------|-----------------|-----------------|-----------------|-----------------|
| 6.90  | -529.9775909804 | -529.6783268470 | -529.9866387419 | -529.6789740640 | -529.9957678730 |
| 7.00  | -529.9775908009 | -529.6783268400 | -529.9866385606 | -529.6789740580 | -529.9957676894 |
| 7.10  | -529.9775906398 | -529.6783268350 | -529.9866383972 | -529.6789740530 | -529.9957675235 |
| 7.20  | -529.9775904929 | -529.6783268310 | -529.9866382498 | -529.6789740490 | -529.9957673757 |
| 7.30  | -529.9775903607 | -529.6783268280 | -529.9866381165 | -529.6789740450 | -529.9957672418 |
| 7.40  | -529.9775902409 | -529.6783268250 | -529.9866379959 | -529.6789740420 | -529.9957671201 |
| 7.50  | -529.9775901323 | -529.6783268230 | -529.9866378864 | -529.6789740400 | -529.9957670098 |
| 7.60  | -529.9775900344 | -529.6783268220 | -529.9866377870 | -529.6789740380 | -529.9957669093 |
| 7.70  | -529.9775899439 | -529.6783268210 | -529.9866376967 | -529.6789740370 | -529.9957668193 |
| 7.80  | -529.9775898622 | -529.6783268200 | -529.9866376145 | -529.6789740350 | -529.9957667371 |
| 7.90  | -529.9775897877 | -529.6783268190 | -529.9866375395 | -529.6789740340 | -529.9957666616 |
| 8.00  | -529.9775897197 | -529.6783268190 | -529.9866374711 | -529.6789740340 | -529.9957665928 |
| 8.10  | -529.9775896583 | -529.6783268190 | -529.9866374085 | -529.6789740330 | -529.9957665294 |
| 8.20  | -529.9775896007 | -529.6783268190 | -529.9866373514 | -529.6789740330 | -529.9957664728 |
| 8.30  | -529.9775895485 | -529.6783268180 | -529.9866372990 | -529.6789740320 | -529.9957664202 |
| 8.40  | -529.9775895007 | -529.6783268180 | -529.9866372509 | -529.6789740320 | -529.9957663719 |
| 8.50  | -529.9775894568 | -529.6783268180 | -529.9866372068 | -529.6789740320 | -529.9957663275 |
| 8.60  | -529.9775894173 | -529.6783268180 | -529.9866371662 | -529.6789740320 | -529.9957662858 |
| 8.70  | -529.9775893794 | -529.6783268180 | -529.9866371290 | -529.6789740320 | -529.9957662493 |
| 8.80  | -529.9775893452 | -529.6783268180 | -529.9866370946 | -529.6789740320 | -529.9957662148 |
| 8.90  | -529.9775893137 | -529.6783268180 | -529.9866370630 | -529.6789740320 | -529.9957661831 |
| 9.00  | -529.9775892846 | -529.6783268180 | -529.9866370338 | -529.6789740320 | -529.9957661537 |
| 9.10  | -529.9775892577 | -529.6783268180 | -529.9866370068 | -529.6789740310 | -529.9957661272 |
| 9.20  | -529.9775892329 | -529.6783268180 | -529.9866369819 | -529.6789740310 | -529.9957661022 |
| 9.30  | -529.9775892099 | -529.6783268180 | -529.9866369588 | -529.6789740310 | -529.9957660791 |
| 9.40  | -529.9775891886 | -529.6783268180 | -529.9866369375 | -529.6789740310 | -529.9957660576 |
| 9.50  | -529.9775891689 | -529.6783268180 | -529.9866369177 | -529.6789740310 | -529.9957660378 |
| 9.60  | -529.9775891506 | -529.6783268180 | -529.9866368993 | -529.6789740310 | -529.9957660194 |
| 9.70  | -529.9775891336 | -529.6783268180 | -529.9866368823 | -529.6789740310 | -529.9957660023 |
| 9.80  | -529.9775891178 | -529.6783268180 | -529.9866368664 | -529.6789740310 | -529.9957659864 |
| 9.90  | -529.9775891031 | -529.6783268180 | -529.9866368517 | -529.6789740310 | -529.9957659716 |
| 10.00 | -529.9775890894 | -529.6783268180 | -529.9866368380 | -529.6789740310 | -529.9957659579 |
| 10.10 | -529.9775890767 | -529.6783268180 | -529.9866368253 | -529.6789740310 | -529.9957659451 |
| 10.20 | -529.9775890648 | -529.6783268180 | -529.9866368134 | -529.6789740310 | -529.9957659332 |
| 10.30 | -529.9775890538 | -529.6783268180 | -529.9866368023 | -529.6789740310 | -529.9957659221 |
| 10.40 | -529.9775890435 | -529.6783268180 | -529.9866367920 | -529.6789740310 | -529.9957659117 |
| 10.50 | -529.9775890338 | -529.6783268180 | -529.9866367823 | -529.6789740310 | -529.9957659020 |
| 10.60 | -529.9775890248 | -529.6783268180 | -529.9866367733 | -529.6789740310 | -529.9957658930 |
| 10.70 | -529.9775890164 | -529.6783268180 | -529.9866367648 | -529.6789740310 | -529.9957658846 |
| 10.80 | -529.9775890085 | -529.6783268180 | -529.9866367569 | -529.6789740310 | -529.9957658766 |
| 10.90 | -529.9775890011 | -529.6783268180 | -529.9866367495 | -529.6789740310 | -529.9957658692 |
| 11.00 | -529.9775889942 | -529.6783268180 | -529.9866367426 | -529.6789740310 | -529.9957658623 |
| 11.10 | -529.9775889877 | -529.6783268180 | -529.9866367361 | -529.6789740310 | -529.9957658558 |
| 11.20 | -529.9775889816 | -529.6783268180 | -529.9866367300 | -529.6789740310 | -529.9957658497 |
| 11.30 | -529.9775889759 | -529.6783268180 | -529.9866367243 | -529.6789740310 | -529.9957658440 |
| 11.40 | -529.9775889705 | -529.6783268180 | -529.9866367189 | -529.6789740310 | -529.9957658386 |
| 11.50 | -529.9775889655 | -529.6783268180 | -529.9866367139 | -529.6789740310 | -529.9957658335 |
| 11.60 | -529.9775889608 | -529.6783268180 | -529.9866367092 | -529.6789740310 | -529.9957658288 |
| 11.70 | -529.9775889563 | -529.6783268180 | -529.9866367047 | -529.6789740310 | -529.9957658243 |
| 11.80 | -529.9775889521 | -529.6783268180 | -529.9866367005 | -529.6789740310 | -529.9957658201 |
| 11.90 | -529.9775889482 | -529.6783268180 | -529.9866366965 | -529.6789740310 | -529.9957658162 |
| 12.00 | -529.9775889444 | -529.6783268180 | -529.9866366928 | -529.6789740310 | -529.9957658125 |

Table S4: He-Kr electronic energies (in hartree) calculated at CCSD(T)/aug-cc-pV4Z (CCSD(T)-4Z), CCSD(T)/aug-cc-pV5Z (CCSD(T)-5Z), and CCSD(T)/CBS levels.

| R(Å) | CCSD(T)-4Z      | SCF-4Z          | CCSD(T)-5Z      | SCF-5Z          | CBS             |
|------|-----------------|-----------------|-----------------|-----------------|-----------------|
| 2.00 | -2755.252990564 | -2754.874497040 | -2755.339920716 | -2754.874785400 | -2755.430964123 |
| 2.10 | -2755.264150870 | -2754.886635060 | -2755.351002217 | -2754.886921450 | -2755.441964050 |
| 2.20 | -2755.272029362 | -2754.895312420 | -2755.358816592 | -2754.895597920 | -2755.449711655 |
| 2.30 | -2755.277557443 | -2754.901490130 | -2755.364292366 | -2754.901775200 | -2755.455132791 |
| 2.40 | -2755.281412801 | -2754.905872180 | -2755.368105111 | -2754.906156980 | -2755.458900977 |
| 2.50 | -2755.284084640 | -2754.908970370 | -2755.370742511 | -2754.909254920 | -2755.461502386 |
| 2.60 | -2755.285923723 | -2754.911154410 | -2755.372554139 | -2754.911438670 | -2755.463285372 |
| 2.70 | -2755.287180099 | -2754.912689900 | -2755.373788978 | -2754.912973870 | -2755.464497777 |
| 2.80 | -2755.288031074 | -2754.913766780 | -2755.374623317 | -2754.914050480 | -2755.465314815 |
| 2.90 | -2755.288601730 | -2754.914520370 | -2755.375181262 | -2754.914803780 | -2755.465859586 |
| 3.00 | -2755.288979834 | -2754.915046670 | -2755.375549714 | -2754.915329780 | -2755.466218080 |
| 3.10 | -2755.289226640 | -2754.915413570 | -2755.375789186 | -2754.915696370 | -2755.466450032 |
| 3.20 | -2755.289384656 | -2754.915668890 | -2755.375941591 | -2754.915951440 | -2755.466596689 |
| 3.30 | -2755.289483182 | -2754.915846240 | -2755.376035781 | -2754.916128660 | -2755.466686402 |
| 3.40 | -2755.289542292 | -2754.915969180 | -2755.376091496 | -2754.916251640 | -2755.466738534 |
| 3.50 | -2755.289575633 | -2754.916054220 | -2755.376122151 | -2754.916336860 | -2755.466766270 |
| 3.60 | -2755.289592413 | -2754.916112940 | -2755.376136785 | -2754.916395840 | -2755.466778507 |
| 3.70 | -2755.289598786 | -2754.916153440 | -2755.376141447 | -2754.916436600 | -2755.466781227 |
| 3.71 | -2755.289599017 | -2754.916156720 | -2755.376141520 | -2754.916439900 | -2755.466781123 |
| 3.72 | -2755.289599195 | -2754.916159880 | -2755.376141550 | -2754.916443090 | -2755.466780982 |
| 3.73 | -2755.289599316 | -2754.916162930 | -2755.376141526 | -2754.916446150 | -2755.466780800 |
| 3.74 | -2755.289599384 | -2754.916165860 | -2755.376141452 | -2754.916449110 | -2755.466780560 |
| 3.75 | -2755.289599402 | -2754.916168690 | -2755.376141332 | -2754.916451960 | -2755.466780282 |
| 3.76 | -2755.289599372 | -2754.916171410 | -2755.376141166 | -2754.916454700 | -2755.466779963 |
| 3.77 | -2755.289599298 | -2754.916174040 | -2755.376140959 | -2754.916457350 | -2755.466779605 |
| 3.78 | -2755.289599180 | -2754.916176570 | -2755.376140711 | -2754.916459900 | -2755.466779210 |
| 3.79 | -2755.289599023 | -2754.916179000 | -2755.376140427 | -2754.916462350 | -2755.466778781 |
| 3.80 | -2755.289598828 | -2754.916181350 | -2755.376140107 | -2754.916464720 | -2755.466778319 |
| 3.81 | -2755.289598596 | -2754.916183610 | -2755.376139754 | -2754.916466990 | -2755.466777833 |
| 3.82 | -2755.289598329 | -2754.916185790 | -2755.376139370 | -2754.916469190 | -2755.466777315 |
| 3.83 | -2755.289598032 | -2754.916187890 | -2755.376138956 | -2754.916471300 | -2755.466776774 |
| 3.84 | -2755.289597705 | -2754.916189910 | -2755.376138516 | -2754.916473340 | -2755.466776203 |
| 3.85 | -2755.289597350 | -2754.916191860 | -2755.376138049 | -2754.916475300 | -2755.466775614 |
| 3.86 | -2755.289596969 | -2754.916193740 | -2755.376137559 | -2754.916477190 | -2755.466775004 |
| 3.87 | -2755.289596562 | -2754.916195550 | -2755.376137046 | -2754.916479020 | -2755.466774368 |
| 3.88 | -2755.289596133 | -2754.916197290 | -2755.376136513 | -2754.916480770 | -2755.466773719 |
| 3.89 | -2755.289595681 | -2754.916198970 | -2755.376135959 | -2754.916482460 | -2755.466773054 |
| 3.90 | -2755.289595213 | -2754.916200590 | -2755.376135398 | -2754.916484090 | -2755.466772389 |
| 4.00 | -2755.289589656 | -2754.916213850 | -2755.376128955 | -2754.916497410 | -2755.466764983 |
| 4.10 | -2755.289583235 | -2754.916222980 | -2755.376121826 | -2754.916506560 | -2755.466757101 |
| 4.20 | -2755.289576627 | -2754.916229270 | -2755.376114660 | -2754.916512850 | -2755.466749348 |
| 4.30 | -2755.289570217 | -2754.916233580 | -2755.376107801 | -2754.916517160 | -2755.466742018 |
| 4.40 | -2755.289564221 | -2754.916236530 | -2755.376101448 | -2754.916520110 | -2755.466735292 |
| 4.50 | -2755.289558735 | -2754.916238530 | -2755.376095685 | -2754.916522130 | -2755.466729226 |
| 4.60 | -2755.289553812 | -2754.916239890 | -2755.376090527 | -2754.916523510 | -2755.466723811 |
| 4.70 | -2755.289549418 | -2754.916240810 | -2755.376085959 | -2754.916524460 | -2755.466719042 |
| 4.80 | -2755.289545543 | -2754.916241420 | -2755.376081935 | -2754.916525100 | -2755.466714845 |
| 4.90 | -2755.289542135 | -2754.916241830 | -2755.376078408 | -2754.916525540 | -2755.466711176 |
| 5.00 | -2755.289539149 | -2754.916242110 | -2755.376075324 | -2754.916525840 | -2755.466707980 |
| 5.10 | -2755.289536540 | -2754.916242290 | -2755.376072633 | -2754.916526050 | -2755.466705184 |
| 5.20 | -2755.289534249 | -2754.916242400 | -2755.376070282 | -2754.916526190 | -2755.466702755 |



|       |                 |                 |                 |                 |                 |
|-------|-----------------|-----------------|-----------------|-----------------|-----------------|
| 5.30  | -2755.289532251 | -2754.916242460 | -2755.376068232 | -2754.916526280 | -2755.466700632 |
| 5.40  | -2755.289530507 | -2754.916242500 | -2755.376066440 | -2754.916526340 | -2755.466698780 |
| 5.50  | -2755.289528974 | -2754.916242510 | -2755.376064874 | -2754.916526380 | -2755.466697161 |
| 5.60  | -2755.289527630 | -2754.916242510 | -2755.376063502 | -2754.916526410 | -2755.466695742 |
| 5.70  | -2755.289526450 | -2754.916242500 | -2755.376062298 | -2754.916526420 | -2755.466694503 |
| 5.80  | -2755.289525412 | -2754.916242480 | -2755.376061241 | -2754.916526420 | -2755.466693414 |
| 5.90  | -2755.289524497 | -2754.916242460 | -2755.376060310 | -2754.916526420 | -2755.466692455 |
| 6.00  | -2755.289523689 | -2754.916242440 | -2755.376059488 | -2754.916526420 | -2755.466691608 |
| 6.10  | -2755.289522974 | -2754.916242420 | -2755.376058762 | -2754.916526410 | -2755.466690865 |
| 6.20  | -2755.289522340 | -2754.916242400 | -2755.376058119 | -2754.916526400 | -2755.466690207 |
| 6.30  | -2755.289521777 | -2754.916242390 | -2755.376057548 | -2754.916526400 | -2755.466689622 |
| 6.40  | -2755.289521276 | -2754.916242370 | -2755.376057041 | -2754.916526390 | -2755.466689102 |
| 6.50  | -2755.289520829 | -2754.916242350 | -2755.376056589 | -2754.916526380 | -2755.466688638 |
| 6.60  | -2755.289520431 | -2754.916242340 | -2755.376056185 | -2754.916526370 | -2755.466688230 |
| 6.70  | -2755.289520073 | -2754.916242330 | -2755.376055824 | -2754.916526360 | -2755.466687865 |
| 6.80  | -2755.289519754 | -2754.916242320 | -2755.376055501 | -2754.916526350 | -2755.466687538 |
| 6.90  | -2755.289519466 | -2754.916242310 | -2755.376055210 | -2754.916526350 | -2755.466687239 |
| 7.00  | -2755.289519208 | -2754.916242300 | -2755.376054949 | -2754.916526340 | -2755.466686975 |
| 7.10  | -2755.289518975 | -2754.916242290 | -2755.376054714 | -2754.916526340 | -2755.466686732 |
| 7.20  | -2755.289518765 | -2754.916242280 | -2755.376054502 | -2754.916526330 | -2755.466686518 |
| 7.30  | -2755.289518575 | -2754.916242280 | -2755.376054311 | -2754.916526330 | -2755.466686325 |
| 7.40  | -2755.289518403 | -2754.916242270 | -2755.376054138 | -2754.916526320 | -2755.466686151 |
| 7.50  | -2755.289518248 | -2754.916242270 | -2755.376053981 | -2754.916526320 | -2755.466685992 |
| 7.60  | -2755.289518106 | -2754.916242270 | -2755.376053838 | -2754.916526320 | -2755.466685849 |
| 7.70  | -2755.289517978 | -2754.916242260 | -2755.376053709 | -2754.916526310 | -2755.466685718 |
| 7.80  | -2755.289517861 | -2754.916242260 | -2755.376053591 | -2754.916526310 | -2755.466685600 |
| 7.90  | -2755.289517754 | -2754.916242260 | -2755.376053484 | -2754.916526310 | -2755.466685492 |
| 8.00  | -2755.289517657 | -2754.916242260 | -2755.376053386 | -2754.916526310 | -2755.466685393 |
| 8.10  | -2755.289517568 | -2754.916242260 | -2755.376053297 | -2754.916526310 | -2755.466685303 |
| 8.20  | -2755.289517487 | -2754.916242260 | -2755.376053215 | -2754.916526310 | -2755.466685221 |
| 8.30  | -2755.289517412 | -2754.916242250 | -2755.376053140 | -2754.916526310 | -2755.466685140 |
| 8.40  | -2755.289517344 | -2754.916242250 | -2755.376053072 | -2754.916526310 | -2755.466685071 |
| 8.50  | -2755.289517282 | -2754.916242250 | -2755.376053009 | -2754.916526300 | -2755.466685014 |
| 8.60  | -2755.289517224 | -2754.916242250 | -2755.376052951 | -2754.916526300 | -2755.466684956 |
| 8.70  | -2755.289517171 | -2754.916242250 | -2755.376052898 | -2754.916526300 | -2755.466684902 |
| 8.80  | -2755.289517123 | -2754.916242250 | -2755.376052849 | -2754.916526300 | -2755.466684853 |
| 8.90  | -2755.289517078 | -2754.916242250 | -2755.376052804 | -2754.916526300 | -2755.466684808 |
| 9.00  | -2755.289517036 | -2754.916242250 | -2755.376052762 | -2754.916526300 | -2755.466684766 |
| 9.10  | -2755.289516998 | -2754.916242250 | -2755.376052724 | -2754.916526300 | -2755.466684727 |
| 9.20  | -2755.289516963 | -2754.916242250 | -2755.376052688 | -2754.916526300 | -2755.466684692 |
| 9.30  | -2755.289516930 | -2754.916242250 | -2755.376052655 | -2754.916526300 | -2755.466684659 |
| 9.40  | -2755.289516900 | -2754.916242250 | -2755.376052625 | -2754.916526300 | -2755.466684628 |
| 9.50  | -2755.289516872 | -2754.916242250 | -2755.376052597 | -2754.916526300 | -2755.466684600 |
| 9.60  | -2755.289516846 | -2754.916242250 | -2755.376052571 | -2754.916526300 | -2755.466684574 |
| 9.70  | -2755.289516821 | -2754.916242250 | -2755.376052547 | -2754.916526300 | -2755.466684550 |
| 9.80  | -2755.289516799 | -2754.916242250 | -2755.376052524 | -2754.916526300 | -2755.466684527 |
| 9.90  | -2755.289516778 | -2754.916242250 | -2755.376052503 | -2754.916526300 | -2755.466684506 |
| 10.00 | -2755.289516759 | -2754.916242250 | -2755.376052484 | -2754.916526300 | -2755.466684487 |
| 10.10 | -2755.289516741 | -2754.916242250 | -2755.376052466 | -2754.916526300 | -2755.466684468 |
| 10.20 | -2755.289516724 | -2754.916242250 | -2755.376052449 | -2754.916526300 | -2755.466684452 |
| 10.30 | -2755.289516708 | -2754.916242250 | -2755.376052433 | -2754.916526300 | -2755.466684436 |
| 10.40 | -2755.289516694 | -2754.916242250 | -2755.376052418 | -2754.916526300 | -2755.466684421 |
| 10.50 | -2755.289516680 | -2754.916242250 | -2755.376052405 | -2754.916526300 | -2755.466684407 |
| 10.60 | -2755.289516667 | -2754.916242250 | -2755.376052392 | -2754.916526300 | -2755.466684394 |

|       |                 |                 |                 |                 |                 |
|-------|-----------------|-----------------|-----------------|-----------------|-----------------|
| 10.70 | -2755.289516655 | -2754.916242250 | -2755.376052380 | -2754.916526300 | -2755.466684383 |
| 10.80 | -2755.289516644 | -2754.916242250 | -2755.376052369 | -2754.916526300 | -2755.466684371 |
| 10.90 | -2755.289516634 | -2754.916242250 | -2755.376052358 | -2754.916526300 | -2755.466684361 |
| 11.00 | -2755.289516624 | -2754.916242250 | -2755.376052349 | -2754.916526300 | -2755.466684351 |
| 11.10 | -2755.289516615 | -2754.916242250 | -2755.376052339 | -2754.916526300 | -2755.466684342 |
| 11.20 | -2755.289516606 | -2754.916242250 | -2755.376052331 | -2754.916526300 | -2755.466684333 |
| 11.30 | -2755.289516598 | -2754.916242250 | -2755.376052323 | -2754.916526300 | -2755.466684325 |
| 11.40 | -2755.289516590 | -2754.916242250 | -2755.376052315 | -2754.916526300 | -2755.466684318 |
| 11.50 | -2755.289516583 | -2754.916242250 | -2755.376052308 | -2754.916526300 | -2755.466684310 |
| 11.60 | -2755.289516577 | -2754.916242250 | -2755.376052301 | -2754.916526300 | -2755.466684304 |
| 11.70 | -2755.289516570 | -2754.916242250 | -2755.376052295 | -2754.916526300 | -2755.466684297 |
| 11.80 | -2755.289516564 | -2754.916242250 | -2755.376052289 | -2754.916526300 | -2755.466684291 |
| 11.90 | -2755.289516559 | -2754.916242250 | -2755.376052283 | -2754.916526300 | -2755.466684286 |
| 12.00 | -2755.289516553 | -2754.916242250 | -2755.376052278 | -2754.916526300 | -2755.466684281 |

Table S5: He-Xe electronic energies (in hartree) calculated at CCSD(T)/aug-cc-pV4Z (CCSD(T)-4Z), CCSD(T)/aug-cc-pV5Z (CCSD(T)-5Z), and CCSD(T)/CBS levels.

| R(Å) | CCSD(T)-4Z      | SCF-4Z          | CCSD(T)-5Z      | SCF-5Z          | CBS             |
|------|-----------------|-----------------|-----------------|-----------------|-----------------|
| 2.00 | -331.5173188458 | -331.0926810160 | -331.5937502896 | -331.0928577950 | -331.6738413436 |
| 2.10 | -331.5343322241 | -331.1108579400 | -331.6106435185 | -331.1110258780 | -331.6906134809 |
| 2.20 | -331.5467926710 | -331.1243147760 | -331.6230062665 | -331.1244782510 | -331.7028762324 |
| 2.30 | -331.5558619375 | -331.1342264650 | -331.6319954535 | -331.1343876490 | -331.7117826887 |
| 2.40 | -331.5624241177 | -331.1414942530 | -331.6384916951 | -331.1416541920 | -331.7182104482 |
| 2.50 | -331.5671452511 | -331.1468023620 | -331.6431583699 | -331.1469614980 | -331.7228204373 |
| 2.60 | -331.5705226807 | -331.1506656840 | -331.6464907404 | -331.1508241220 | -331.7261059248 |
| 2.70 | -331.5729248513 | -331.1534687640 | -331.6488557056 | -331.1536264420 | -331.7284322819 |
| 2.80 | -331.5746229090 | -331.1554969310 | -331.6505232721 | -331.1556537450 | -331.7300683429 |
| 2.90 | -331.5758152328 | -331.1569607170 | -331.6516908679 | -331.1571166080 | -331.7312105131 |
| 3.00 | -331.5766462069 | -331.1580147350 | -331.6525020526 | -331.1581697260 | -331.7320014408 |
| 3.10 | -331.5772203778 | -331.1580147350 | -331.6530606312 | -331.1589262690 | -331.7321186394 |
| 3.20 | -331.5776131609 | -331.1587720750 | -331.6534412584 | -331.1594687260 | -331.7326072326 |
| 3.30 | -331.5778785918 | -331.1593151740 | -331.6536973289 | -331.1598570180 | -331.7329404519 |
| 3.40 | -331.5780552423 | -331.1597039290 | -331.6538668222 | -331.1601345350 | -331.7331649288 |
| 3.50 | -331.5781704831 | -331.1599817290 | -331.6539766004 | -331.1603326010 | -331.7333137698 |
| 3.60 | -331.5782436416 | -331.1601799150 | -331.6540455597 | -331.1604737770 | -331.7334103512 |
| 3.70 | -331.5782882364 | -331.1603210730 | -331.6540869196 | -331.1605742730 | -331.7334711607 |
| 3.80 | -331.5783137117 | -331.1604927230 | -331.6541098483 | -331.1606457200 | -331.7335477110 |
| 3.90 | -331.5783266058 | -331.1605432620 | -331.6541207390 | -331.1606964500 | -331.7335340754 |
| 3.91 | -331.5783273920 | -331.1605474240 | -331.6541213505 | -331.1607006300 | -331.7335578360 |
| 3.92 | -331.5783280989 | -331.1605514440 | -331.6541218850 | -331.1607046680 | -331.7335548420 |
| 3.93 | -331.5783287329 | -331.1605553280 | -331.6541223507 | -331.1607085700 | -331.7335493653 |
| 3.94 | -331.5783292973 | -331.1605590800 | -331.6541227504 | -331.1607123400 | -331.7335426515 |
| 3.95 | -331.5783297952 | -331.1605627050 | -331.6541230870 | -331.1607159820 | -331.7335355181 |
| 3.96 | -331.5783302296 | -331.1605662070 | -331.6541233636 | -331.1607195010 | -331.7335284077 |
| 3.97 | -331.5783306036 | -331.1605695910 | -331.6541235833 | -331.1607229010 | -331.7335216382 |
| 3.98 | -331.5783309199 | -331.1605728590 | -331.6541237487 | -331.1607261860 | -331.7335153566 |
| 3.99 | -331.5783311812 | -331.1605760170 | -331.6541238624 | -331.1607293600 | -331.7335096302 |
| 4.00 | -331.5783313902 | -331.1605790680 | -331.6541239416 | -331.1607324260 | -331.7335044723 |
| 4.01 | -331.5783315495 | -331.1605820150 | -331.6541239595 | -331.1607353880 | -331.7334998685 |
| 4.02 | -331.5783316612 | -331.1605848620 | -331.6541239331 | -331.1607382490 | -331.7334957864 |
| 4.03 | -331.5783317277 | -331.1605876130 | -331.6541238643 | -331.1607410130 | -331.7334921753 |
| 4.04 | -331.5783317514 | -331.1605902700 | -331.6541237480 | -331.1607436840 | -331.7334890026 |
| 4.05 | -331.5783317344 | -331.1605928370 | -331.6541236022 | -331.1607462640 | -331.7334862131 |

|      |                 |                 |                 |                 |                 |
|------|-----------------|-----------------|-----------------|-----------------|-----------------|
| 4.06 | -331.5783316786 | -331.1605953170 | -331.6541234189 | -331.1607487560 | -331.7334837625 |
| 4.07 | -331.5783315860 | -331.1605977130 | -331.6541232026 | -331.1607511640 | -331.7334816109 |
| 4.08 | -331.5783314586 | -331.1606000270 | -331.6541229535 | -331.1607534900 | -331.7334797192 |
| 4.09 | -331.5783312981 | -331.1606022630 | -331.6541226740 | -331.1607557360 | -331.7334780505 |
| 4.10 | -331.5783311057 | -331.1606044230 | -331.6541223672 | -331.1607579060 | -331.7334765857 |
| 4.20 | -331.5783278020 | -331.1606223770 | -331.6541180231 | -331.1607759330 | -331.7334752918 |
| 4.30 | -331.5783228352 | -331.1606350910 | -331.6541122103 | -331.1607886710 | -331.7334741484 |
| 4.40 | -331.5783170857 | -331.1606440950 | -331.6541057821 | -331.1607976630 | -331.7334731353 |
| 4.50 | -331.5783111177 | -331.1606504660 | -331.6540992496 | -331.1608040080 | -331.7334722369 |
| 4.60 | -331.5783052628 | -331.1606549680 | -331.6540929410 | -331.1608084830 | -331.7334714391 |
| 4.70 | -331.5782997228 | -331.1606581410 | -331.6540870346 | -331.1608116400 | -331.7334707288 |
| 4.80 | -331.5782946014 | -331.1606603700 | -331.6540816177 | -331.1608138680 | -331.7334700947 |
| 4.90 | -331.5782899404 | -331.1606619290 | -331.6540767183 | -331.1608154420 | -331.7334695296 |
| 5.00 | -331.5782857442 | -331.1606630160 | -331.6540723298 | -331.1608165530 | -331.7334690227 |
| 5.10 | -331.5782819950 | -331.1606637720 | -331.6540684258 | -331.1608173370 | -331.7334685691 |
| 5.20 | -331.5782786641 | -331.1606642950 | -331.6540649664 | -331.1608178900 | -331.7334681616 |
| 5.30 | -331.5782757143 | -331.1606646580 | -331.6540619147 | -331.1608182780 | -331.7334677953 |
| 5.40 | -331.5782731077 | -331.1606649080 | -331.6540592249 | -331.1608185500 | -331.7334674651 |
| 5.50 | -331.5782708073 | -331.1606650790 | -331.6540568561 | -331.1608187390 | -331.7334671680 |
| 5.60 | -331.5782687779 | -331.1606651960 | -331.6540547706 | -331.1608188690 | -331.7334668993 |
| 5.70 | -331.5782669875 | -331.1606652730 | -331.6540529341 | -331.1608189580 | -331.7334666566 |
| 5.80 | -331.5782654110 | -331.1606653230 | -331.6540513157 | -331.1608190190 | -331.7334664364 |
| 5.90 | -331.5782640139 | -331.1606653530 | -331.6540498880 | -331.1608190580 | -331.7334662369 |
| 6.00 | -331.5782627788 | -331.1606653680 | -331.6540486269 | -331.1608190830 | -331.7334660561 |
| 6.10 | -331.5782616849 | -331.1606653730 | -331.6540475116 | -331.1608190980 | -331.7334658914 |
| 6.20 | -331.5782607148 | -331.1606653700 | -331.6540465236 | -331.1608191060 | -331.7334657418 |
| 6.30 | -331.5782598531 | -331.1606653630 | -331.6540456470 | -331.1608191100 | -331.7334656053 |
| 6.40 | -331.5782590865 | -331.1606653530 | -331.6540448679 | -331.1608191100 | -331.7334654806 |
| 6.50 | -331.5782584034 | -331.1606653410 | -331.6540441742 | -331.1608191080 | -331.7334653675 |
| 6.60 | -331.5782577937 | -331.1606653280 | -331.6540435556 | -331.1608191060 | -331.7334652629 |
| 6.70 | -331.5782572485 | -331.1606653160 | -331.6540430029 | -331.1608191020 | -331.7334651676 |
| 6.80 | -331.5782567602 | -331.1606653030 | -331.6540425083 | -331.1608190990 | -331.7334650805 |
| 6.90 | -331.5782563222 | -331.1606652920 | -331.6540420649 | -331.1608190960 | -331.7334650002 |
| 7.00 | -331.5782559287 | -331.1606652810 | -331.6540416667 | -331.1608190930 | -331.7334649263 |
| 7.10 | -331.5782555745 | -331.1606652710 | -331.6540413085 | -331.1608190900 | -331.7334648587 |
| 7.20 | -331.5782552552 | -331.1606652620 | -331.6540409858 | -331.1608190880 | -331.7334647960 |
| 7.30 | -331.5782549669 | -331.1606652550 | -331.6540406946 | -331.1608190860 | -331.7334647386 |
| 7.40 | -331.5782547063 | -331.1606652480 | -331.6540404314 | -331.1608190840 | -331.7334646846 |
| 7.50 | -331.5782544703 | -331.1606652420 | -331.6540401932 | -331.1608190820 | -331.7334646351 |
| 7.60 | -331.5782542563 | -331.1606652360 | -331.6540399773 | -331.1608190800 | -331.7334645900 |
| 7.70 | -331.5782540620 | -331.1606652320 | -331.6540397813 | -331.1608190790 | -331.7334645477 |
| 7.80 | -331.5782538853 | -331.1606652280 | -331.6540396031 | -331.1608190770 | -331.7334645084 |
| 7.90 | -331.5782537244 | -331.1606652240 | -331.6540394410 | -331.1608190750 | -331.7334644721 |
| 8.00 | -331.5782535777 | -331.1606652220 | -331.6540392931 | -331.1608190740 | -331.7334644388 |
| 8.10 | -331.5782534438 | -331.1606652190 | -331.6540391582 | -331.1608190720 | -331.7334644075 |
| 8.20 | -331.5782533214 | -331.1606652170 | -331.6540390350 | -331.1608190710 | -331.7334643783 |
| 8.30 | -331.5782532095 | -331.1606652160 | -331.6540389222 | -331.1608190690 | -331.7334643512 |
| 8.40 | -331.5782531070 | -331.1606652140 | -331.6540388189 | -331.1608190680 | -331.7334643259 |
| 8.50 | -331.5782530129 | -331.1606652130 | -331.6540387242 | -331.1608190670 | -331.7334643023 |
| 8.60 | -331.5782529265 | -331.1606652130 | -331.6540386373 | -331.1608190660 | -331.7334642804 |
| 8.70 | -331.5782528471 | -331.1606652120 | -331.6540385574 | -331.1608190650 | -331.7334642599 |
| 8.80 | -331.5782527740 | -331.1606652110 | -331.6540384839 | -331.1608190640 | -331.7334642407 |
| 8.90 | -331.5782527068 | -331.1606652110 | -331.6540384163 | -331.1608190630 | -331.7334642229 |
| 9.00 | -331.5782526448 | -331.1606652110 | -331.6540383539 | -331.1608190630 | -331.7334642061 |

|       |                 |                 |                 |                 |                 |
|-------|-----------------|-----------------|-----------------|-----------------|-----------------|
| 9.10  | -331.5782525876 | -331.1606652110 | -331.6540382963 | -331.1608190620 | -331.7334641905 |
| 9.20  | -331.5782525347 | -331.1606652100 | -331.6540382432 | -331.1608190620 | -331.7334641758 |
| 9.30  | -331.5782524858 | -331.1606652100 | -331.6540381940 | -331.1608190620 | -331.7334641621 |
| 9.40  | -331.5782524406 | -331.1606652100 | -331.6540381486 | -331.1608190610 | -331.7334641492 |
| 9.50  | -331.5782523987 | -331.1606652100 | -331.6540381065 | -331.1608190610 | -331.7334641372 |
| 9.60  | -331.5782523599 | -331.1606652100 | -331.6540380674 | -331.1608190610 | -331.7334641258 |
| 9.70  | -331.5782523239 | -331.1606652100 | -331.6540380313 | -331.1608190610 | -331.7334641152 |
| 9.80  | -331.5782522905 | -331.1606652100 | -331.6540379977 | -331.1608190600 | -331.7334641052 |
| 9.90  | -331.5782522594 | -331.1606652100 | -331.6540379664 | -331.1608190600 | -331.7334640958 |
| 10.00 | -331.5782522305 | -331.1606652100 | -331.6540379374 | -331.1608190600 | -331.7334640870 |
| 10.10 | -331.5782522036 | -331.1606652100 | -331.6540379104 | -331.1608190600 | -331.7334640787 |
| 10.20 | -331.5782521786 | -331.1606652100 | -331.6540378852 | -331.1608190600 | -331.7334640708 |

Table S6: He-Rn electronic energies (in hartree) calculated at CCSD(T)/aug-cc-pV4Z (CCSD(T)-4Z), CCSD(T)/aug-cc-pV5Z (CCSD(T)-5Z), and CCSD(T)/CBS levels.

| R(Å) | CCSD(T)-4Z      | SCF-4Z          | CCSD(T)-5Z      | SCF-5Z          | CBS             |
|------|-----------------|-----------------|-----------------|-----------------|-----------------|
| 3.00 | -290.8478632322 | -290.4015535240 | -290.9433623324 | -290.4017131920 | -291.0434684093 |
| 3.10 | -290.8486121173 | -290.4025097060 | -290.9440902255 | -290.4026684060 | -291.0441748217 |
| 3.20 | -290.8491356538 | -290.4032047400 | -290.9445970548 | -290.4033626150 | -291.0446645857 |
| 3.30 | -290.8494981805 | -290.4037091100 | -290.9449464576 | -290.4038663420 | -291.0450005804 |
| 3.40 | -290.8497463281 | -290.4040745400 | -290.9451844069 | -290.4042313300 | -291.0452280781 |
| 3.50 | -290.8499137425 | -290.4043389030 | -290.9453439816 | -290.4044954450 | -291.0453795670 |
| 3.60 | -290.8500245850 | -290.4045298690 | -290.9454488312 | -290.4046863330 | -291.0454781728 |
| 3.70 | -290.8500961258 | -290.4046676200 | -290.9455157908 | -290.4048241350 | -291.0455402972 |
| 3.80 | -290.8501406268 | -290.4047668510 | -290.9455567762 | -290.4049234960 | -291.0455775210 |
| 3.90 | -290.8501667490 | -290.4048382450 | -290.9455801766 | -290.4049950540 | -291.0455979736 |
| 4.00 | -290.8501805605 | -290.4048895570 | -290.9455918668 | -290.4050465280 | -291.0456073472 |
| 4.10 | -290.8501863140 | -290.4049264060 | -290.9455959208 | -290.4050835120 | -291.0456095422 |
| 4.11 | -290.8501865677 | -290.4049294620 | -290.9455960231 | -290.4050865800 | -291.0456094790 |
| 4.12 | -290.8501867714 | -290.4049324190 | -290.9455960802 | -290.4050895480 | -291.0456093761 |
| 4.13 | -290.8501869287 | -290.4049352800 | -290.9455960943 | -290.4050924190 | -291.0456092343 |
| 4.14 | -290.8501870418 | -290.4049380470 | -290.9455960672 | -290.4050951960 | -291.0456090546 |
| 4.15 | -290.8501871129 | -290.4049407240 | -290.9455959909 | -290.4050978830 | -291.0456088180 |
| 4.16 | -290.8501871440 | -290.4049433130 | -290.9455958894 | -290.4051004820 | -291.0456085717 |
| 4.17 | -290.8501871371 | -290.4049458180 | -290.9455957512 | -290.4051029950 | -291.0456082913 |
| 4.18 | -290.8501870939 | -290.4049482410 | -290.9455955797 | -290.4051054270 | -291.0456079800 |
| 4.19 | -290.8501870163 | -290.4049505850 | -290.9455953764 | -290.4051077790 | -291.0456076404 |
| 4.20 | -290.8501869060 | -290.4049528530 | -290.9455951430 | -290.4051100540 | -291.0456072740 |
| 4.21 | -290.8501867646 | -290.4049550460 | -290.9455948811 | -290.4051122550 | -291.0456068811 |
| 4.22 | -290.8501865937 | -290.4049571680 | -290.9455945920 | -290.4051143830 | -291.0456064647 |
| 4.23 | -290.8501863947 | -290.4049592200 | -290.9455942775 | -290.4051164420 | -291.0456060250 |
| 4.24 | -290.8501861692 | -290.4049612050 | -290.9455939387 | -290.4051184340 | -291.0456055635 |
| 4.25 | -290.8501859186 | -290.4049631260 | -290.9455935772 | -290.4051203600 | -291.0456050827 |
| 4.30 | -290.8501843340 | -290.4049718270 | -290.9455914780 | -290.4051290830 | -291.0456024313 |
| 4.40 | -290.8501799392 | -290.4049854380 | -290.9455861895 | -290.4051427100 | -291.0455961960 |
| 4.50 | -290.8501746240 | -290.4049952000 | -290.9455801348 | -290.4051524600 | -291.0455893723 |
| 4.60 | -290.8501689588 | -290.4050021970 | -290.9455738709 | -290.4051594320 | -291.0455824942 |
| 4.70 | -290.8501633140 | -290.4050072090 | -290.9455677184 | -290.4051644140 | -291.0455758261 |
| 4.80 | -290.8501578939 | -290.4050107950 | -290.9455618885 | -290.4051679750 | -291.0455695802 |
| 4.90 | -290.8501528281 | -290.4050133540 | -290.9455564870 | -290.4051705220 | -291.0455638332 |
| 5.00 | -290.8501481749 | -290.4050151750 | -290.9455515595 | -290.4051723440 | -291.0455586174 |
| 5.10 | -290.8501439514 | -290.4050164670 | -290.9455471295 | -290.4051736470 | -291.0455539646 |
| 5.20 | -290.8501401516 | -290.4050173790 | -290.9455431427 | -290.4051745790 | -291.0455497702 |

|       |                 |                 |                 |                 |                 |
|-------|-----------------|-----------------|-----------------|-----------------|-----------------|
| 5.30  | -290.8501367521 | -290.4050180210 | -290.9455395978 | -290.4051752450 | -291.0455460594 |
| 5.40  | -290.8501337237 | -290.4050184700 | -290.9455364505 | -290.4051757190 | -291.0455427733 |
| 5.50  | -290.8501310337 | -290.4050187820 | -290.9455336638 | -290.4051760550 | -291.0455398716 |
| 5.60  | -290.8501286504 | -290.4050189980 | -290.9455311993 | -290.4051762930 | -291.0455373095 |
| 5.70  | -290.8501265374 | -290.4050191470 | -290.9455290213 | -290.4051764600 | -291.0455350533 |
| 5.80  | -290.8501246662 | -290.4050192480 | -290.9455270967 | -290.4051765760 | -291.0455330641 |
| 5.90  | -290.8501230083 | -290.4050193160 | -290.9455253950 | -290.4051766560 | -291.0455313098 |
| 6.00  | -290.8501215388 | -290.4050193610 | -290.9455238895 | -290.4051767110 | -291.0455297609 |
| 6.10  | -290.8501202351 | -290.4050193890 | -290.9455225561 | -290.4051767480 | -291.0455283913 |
| 6.20  | -290.8501190773 | -290.4050194060 | -290.9455213737 | -290.4051767710 | -291.0455271797 |
| 6.30  | -290.8501180478 | -290.4050194140 | -290.9455203238 | -290.4051767860 | -291.0455261045 |
| 6.40  | -290.8501171311 | -290.4050194170 | -290.9455193900 | -290.4051767940 | -291.0455251500 |
| 6.50  | -290.8501163138 | -290.4050194170 | -290.9455185584 | -290.4051767980 | -291.0455243011 |
| 6.60  | -290.8501155839 | -290.4050194130 | -290.9455178165 | -290.4051767990 | -291.0455235438 |
| 6.70  | -290.8501149311 | -290.4050194080 | -290.9455171536 | -290.4051767980 | -291.0455228680 |
| 6.80  | -290.8501143464 | -290.4050194020 | -290.9455165603 | -290.4051767960 | -291.0455222635 |
| 6.90  | -290.8501138218 | -290.4050193950 | -290.9455160284 | -290.4051767940 | -291.0455217211 |
| 7.00  | -290.8501133504 | -290.4050193880 | -290.9455155508 | -290.4051767910 | -291.0455212347 |
| 7.10  | -290.8501129262 | -290.4050193800 | -290.9455151211 | -290.4051767880 | -291.0455207966 |
| 7.20  | -290.8501125438 | -290.4050193740 | -290.9455147342 | -290.4051767850 | -291.0455204032 |
| 7.30  | -290.8501121986 | -290.4050193670 | -290.9455143852 | -290.4051767820 | -291.0455200478 |
| 7.40  | -290.8501118866 | -290.4050193610 | -290.9455140697 | -290.4051767790 | -291.0455197272 |
| 7.50  | -290.8501116040 | -290.4050193550 | -290.9455137843 | -290.4051767760 | -291.0455194369 |
| 7.60  | -290.8501113479 | -290.4050193500 | -290.9455135256 | -290.4051767740 | -291.0455191740 |
| 7.70  | -290.8501111153 | -290.4050193450 | -290.9455132908 | -290.4051767720 | -291.0455189351 |
| 7.80  | -290.8501109039 | -290.4050193410 | -290.9455130774 | -290.4051767690 | -291.0455187192 |
| 7.90  | -290.8501107114 | -290.4050193380 | -290.9455128833 | -290.4051767670 | -291.0455185227 |
| 8.00  | -290.8501105359 | -290.4050193340 | -290.9455127063 | -290.4051767650 | -291.0455183431 |
| 8.10  | -290.8501103757 | -290.4050193320 | -290.9455125449 | -290.4051767640 | -291.0455181798 |
| 8.20  | -290.8501102294 | -290.4050193290 | -290.9455123975 | -290.4051767620 | -291.0455180306 |
| 8.30  | -290.8501100955 | -290.4050193270 | -290.9455122625 | -290.4051767600 | -291.0455178946 |
| 8.40  | -290.8501099729 | -290.4050193250 | -290.9455121391 | -290.4051767590 | -291.0455177697 |
| 8.50  | -290.8501098604 | -290.4050193240 | -290.9455120258 | -290.4051767580 | -291.0455176557 |
| 8.60  | -290.8501097573 | -290.4050193230 | -290.9455119219 | -290.4051767570 | -291.0455175510 |
| 8.70  | -290.8501096624 | -290.4050193220 | -290.9455118265 | -290.4051767560 | -291.0455174549 |
| 8.80  | -290.8501095751 | -290.4050193210 | -290.9455117386 | -290.4051767550 | -291.0455173664 |
| 8.90  | -290.8501094947 | -290.4050193200 | -290.9455116578 | -290.4051767540 | -291.0455172851 |
| 9.00  | -290.8501094206 | -290.4050193200 | -290.9455115833 | -290.4051767530 | -291.0455172108 |
| 9.10  | -290.8501093522 | -290.4050193190 | -290.9455115146 | -290.4051767520 | -291.0455171418 |
| 9.20  | -290.8501092891 | -290.4050193190 | -290.9455114511 | -290.4051767520 | -291.0455170779 |
| 9.30  | -290.8501092308 | -290.4050193190 | -290.9455113925 | -290.4051767520 | -291.0455170190 |
| 9.40  | -290.8501091768 | -290.4050193190 | -290.9455113382 | -290.4051767510 | -291.0455169650 |
| 9.50  | -290.8501091268 | -290.4050193180 | -290.9455112880 | -290.4051767510 | -291.0455169140 |
| 9.60  | -290.8501090804 | -290.4050193180 | -290.9455112414 | -290.4051767510 | -291.0455168672 |
| 9.70  | -290.8501090375 | -290.4050193180 | -290.9455111983 | -290.4051767500 | -291.0455168244 |
| 9.80  | -290.8501089976 | -290.4050193180 | -290.9455111582 | -290.4051767500 | -291.0455167841 |
| 9.90  | -290.8501089605 | -290.4050193180 | -290.9455111210 | -290.4051767500 | -291.0455167468 |
| 10.00 | -290.8501089260 | -290.4050193180 | -290.9455110864 | -290.4051767500 | -291.0455167120 |
| 10.10 | -290.8501088939 | -290.4050193180 | -290.9455110542 | -290.4051767500 | -291.0455166797 |
| 10.20 | -290.8501088640 | -290.4050193180 | -290.9455110241 | -290.4051767500 | -291.0455166495 |
| 10.30 | -290.8501088362 | -290.4050193180 | -290.9455109962 | -290.4051767500 | -291.0455166215 |
| 10.40 | -290.8501088102 | -290.4050193180 | -290.9455109701 | -290.4051767500 | -291.0455165953 |
| 10.50 | -290.8501087860 | -290.4050193180 | -290.9455109458 | -290.4051767500 | -291.0455165709 |
| 10.60 | -290.8501087633 | -290.4050193180 | -290.9455109231 | -290.4051767500 | -291.0455165482 |

|       |                 |                 |                 |                 |                 |
|-------|-----------------|-----------------|-----------------|-----------------|-----------------|
| 10.70 | -290.8501087422 | -290.4050193180 | -290.9455109019 | -290.4051767500 | -291.0455165268 |
| 10.80 | -290.8501087223 | -290.4050193180 | -290.9455108820 | -290.4051767500 | -291.0455165069 |
| 10.90 | -290.8501087038 | -290.4050193180 | -290.9455108634 | -290.4051767500 | -291.0455164882 |
| 11.00 | -290.8501086865 | -290.4050193180 | -290.9455108460 | -290.4051767500 | -291.0455164708 |
| 11.10 | -290.8501086703 | -290.4050193180 | -290.9455108298 | -290.4051767500 | -291.0455164545 |
| 11.20 | -290.8501086550 | -290.4050193180 | -290.9455108144 | -290.4051767500 | -291.0455164391 |
| 11.30 | -290.8501086407 | -290.4050193180 | -290.9455108001 | -290.4051767500 | -291.0455164248 |
| 11.40 | -290.8501086273 | -290.4050193180 | -290.9455107867 | -290.4051767500 | -291.0455164113 |
| 11.50 | -290.8501086147 | -290.4050193180 | -290.9455107741 | -290.4051767500 | -291.0455163986 |
| 11.60 | -290.8501086028 | -290.4050193180 | -290.9455107622 | -290.4051767500 | -291.0455163867 |
| 11.70 | -290.8501085917 | -290.4050193180 | -290.9455107510 | -290.4051767500 | -291.0455163755 |
| 11.80 | -290.8501085812 | -290.4050193180 | -290.9455107405 | -290.4051767500 | -291.0455163650 |
| 11.90 | -290.8501085714 | -290.4050193180 | -290.9455107306 | -290.4051767500 | -291.0455163550 |
| 12.00 | -290.8501085621 | -290.4050193180 | -290.9455107213 | -290.4051767500 | -291.0455163457 |

Table S7: Ne<sub>2</sub> electronic energies (in hartree) calculated at CCSD(T)/aug-cc-pV4Z (CCSD(T)-4Z), CCSD(T)/aug-cc-pV5Z (CCSD(T)-5Z), and CCSD(T)/CBS levels.

| R(Å) | CCSD(T)-4Z      | SCF-4Z          | CCSD(T)-5Z      | SCF-5Z          | CBS             |
|------|-----------------|-----------------|-----------------|-----------------|-----------------|
| 2.00 | -257.6820198143 | -257.0731902770 | -257.7070088970 | -257.0791695350 | -257.7298678435 |
| 2.10 | -257.6870548539 | -257.0784825640 | -257.7119987964 | -257.0844720040 | -257.7348046624 |
| 2.20 | -257.6901938001 | -257.0818277560 | -257.7150987484 | -257.0878249030 | -257.7378593729 |
| 2.30 | -257.6921398026 | -257.0839446710 | -257.7170113403 | -257.0899447390 | -257.7397352700 |
| 2.40 | -257.6933366747 | -257.0852843910 | -257.7181803622 | -257.0912846250 | -257.7408749787 |
| 2.50 | -257.6940645625 | -257.0861292950 | -257.7188858334 | -257.0921310050 | -257.7415561016 |
| 2.60 | -257.6945001539 | -257.0866580890 | -257.7193040528 | -257.0926651200 | -257.7419531054 |
| 2.70 | -257.6947547138 | -257.0869859900 | -257.7195456632 | -257.0930018420 | -257.7421761738 |
| 2.80 | -257.6948981519 | -257.0871880210 | -257.7196797777 | -257.0932140210 | -257.7422948053 |
| 2.90 | -257.6949742693 | -257.0873125800 | -257.7197493572 | -257.0933477500 | -257.7423523736 |
| 3.00 | -257.6950104078 | -257.0873900970 | -257.7197809377 | -257.0934320600 | -257.7423753556 |
| 3.10 | -257.6950233940 | -257.0874390940 | -257.7197907830 | -257.0934851640 | -257.7423795983 |
| 3.11 | -257.6950238655 | -257.0874428940 | -257.7197909923 | -257.0934892410 | -257.7423793769 |
| 3.12 | -257.6950242237 | -257.0874465300 | -257.7197910782 | -257.0934931320 | -257.7423790338 |
| 3.13 | -257.6950244680 | -257.0874500100 | -257.7197910790 | -257.0934968450 | -257.7423786483 |
| 3.14 | -257.6950246106 | -257.0874533390 | -257.7197909824 | -257.0935003890 | -257.7423781799 |
| 3.15 | -257.6950246569 | -257.0874565260 | -257.7197907972 | -257.0935037700 | -257.7423776428 |
| 3.16 | -257.6950246133 | -257.0874595770 | -257.7197905288 | -257.0935069970 | -257.7423770396 |
| 3.17 | -257.6950244854 | -257.0874624960 | -257.7197901821 | -257.0935100750 | -257.7423763740 |
| 3.18 | -257.6950242792 | -257.0874652910 | -257.7197897636 | -257.0935130110 | -257.7423756537 |
| 3.19 | -257.6950239998 | -257.0874679660 | -257.7197892779 | -257.0935158120 | -257.7423748807 |
| 3.20 | -257.6950236522 | -257.0874705270 | -257.7197887294 | -257.0935184840 | -257.7423740592 |
| 3.21 | -257.6950232411 | -257.0874729780 | -257.7197881231 | -257.0935210310 | -257.7423731940 |
| 3.22 | -257.6950227712 | -257.0874753250 | -257.7197874628 | -257.0935234610 | -257.7423722874 |
| 3.23 | -257.6950222466 | -257.0874775700 | -257.7197867526 | -257.0935257780 | -257.7423713420 |
| 3.24 | -257.6950216714 | -257.0874797200 | -257.7197859964 | -257.0935279860 | -257.7423703633 |
| 3.25 | -257.6950210494 | -257.0874817760 | -257.7197851976 | -257.0935300920 | -257.7423693510 |
| 3.26 | -257.6950203843 | -257.0874837440 | -257.7197843596 | -257.0935320990 | -257.7423683096 |
| 3.27 | -257.6950196794 | -257.0874856260 | -257.7197834861 | -257.0935340110 | -257.7423672425 |
| 3.28 | -257.6950189380 | -257.0874874270 | -257.7197825798 | -257.0935358340 | -257.7423661508 |
| 3.29 | -257.6950181632 | -257.0874891490 | -257.7197816437 | -257.0935375710 | -257.7423650369 |
| 3.30 | -257.6950173573 | -257.0874907950 | -257.7197806775 | -257.0935392250 | -257.7423638981 |
| 3.40 | -257.6950081540 | -257.0875036810 | -257.7197700535 | -257.0935519860 | -257.7423518537 |
| 3.50 | -257.6949980877 | -257.0875115360 | -257.7197588001 | -257.0935597350 | -257.7423394144 |
| 3.60 | -257.6949882487 | -257.0875159430 | -257.7197479208 | -257.0935643970 | -257.7423273004 |

|      |                 |                 |                 |                 |                 |
|------|-----------------|-----------------|-----------------|-----------------|-----------------|
| 3.70 | -257.6949791655 | -257.0875180430 | -257.7197379510 | -257.0935672050 | -257.7423160026 |
| 3.80 | -257.6949710455 | -257.0875186840 | -257.7197290767 | -128.5467861750 | -257.7422965303 |
| 3.90 | -257.6949639263 | -257.0875184850 | -257.7197212947 | -257.0935700130 | -257.7422885661 |
| 4.00 | -257.6949577574 | -257.0875178670 | -257.7197146111 | -257.0935707130 | -257.7422817670 |
| 4.10 | -257.6949524504 | -257.0875170910 | -257.7197089112 | -257.0935711600 | -257.7422759336 |
| 4.20 | -257.6949479023 | -257.0875163010 | -257.7197040251 | -257.0935714250 | -257.7422710048 |
| 4.30 | -257.6949440178 | -257.0875155610 | -257.7196998692 | -257.0935715540 | -257.7422668482 |
| 4.40 | -257.6949406944 | -257.0875148940 | -257.7196963295 | -257.0935715810 | -257.7422633550 |
| 4.50 | -257.6949378498 | -257.0875143030 | -257.7196933191 | -257.0935715400 | -257.7422603976 |
| 4.60 | -257.6949354206 | -257.0875137830 | -257.7196907522 | -257.0935714580 | -257.7422579340 |
| 4.70 | -257.6949333357 | -257.0875133310 | -257.7196885788 | -257.0935713570 | -257.7422557636 |
| 4.80 | -257.6949315487 | -257.0875129430 | -257.7196866825 | -257.0935712530 | -257.7422539490 |
| 4.90 | -257.6949300099 | -257.0875126180 | -257.7196850708 | -257.0935711530 | -257.7422524004 |
| 5.00 | -257.6949286825 | -257.0875123520 | -257.7196836837 | -257.0935710630 | -257.7422510756 |
| 5.10 | -257.6949275356 | -257.0875121400 | -257.7196824865 | -257.0935709840 | -257.7422499423 |
| 5.20 | -257.6949265398 | -257.0875119760 | -257.7196814493 | -257.0935709140 | -257.7422489715 |
| 5.30 | -257.6949256742 | -257.0875118530 | -257.7196805492 | -257.0935708520 | -257.7422481379 |
| 5.40 | -257.6949249202 | -257.0875117640 | -257.7196797654 | -257.0935707960 | -257.7422474198 |
| 5.50 | -257.6949242612 | -257.0875117010 | -257.7196790814 | -257.0935707470 | -257.7422468005 |
| 5.60 | -257.6949236848 | -257.0875116590 | -257.7196784832 | -257.0935707020 | -257.7422462616 |
| 5.70 | -257.6949231771 | -257.0875116300 | -257.7196779575 | -257.0935706630 | -257.7422457933 |
| 5.80 | -257.6949227305 | -257.0875116130 | -257.7196774954 | -257.0935706280 | -257.7422453828 |
| 5.90 | -257.6949223366 | -257.0875116020 | -257.7196770879 | -257.0935705970 | -257.7422450218 |
| 6.00 | -257.6949219882 | -257.0875115960 | -257.7196767279 | -257.0935705710 | -257.7422447022 |
| 6.10 | -257.6949216802 | -257.0875115920 | -257.7196764095 | -257.0935705500 | -257.7422444194 |
| 6.20 | -257.6949214053 | -257.0875115910 | -257.7196761262 | -257.0935705320 | -257.7422441673 |
| 6.30 | -257.6949211609 | -257.0875115900 | -257.7196758744 | -257.0935705180 | -257.7422439417 |
| 6.40 | -257.6949209432 | -257.0875115890 | -257.7196756501 | -257.0935705070 | -257.7422437404 |
| 6.50 | -257.6949207486 | -257.0875115890 | -257.7196754498 | -257.0935704980 | -257.7422435597 |
| 6.60 | -257.6949205752 | -257.0875115890 | -257.7196752709 | -257.0935704910 | -257.7422433972 |
| 6.70 | -257.6949204184 | -257.0875115890 | -257.7196751100 | -257.0935704860 | -257.7422432509 |
| 6.80 | -257.6949202778 | -257.0875115890 | -257.7196749658 | -257.0935704830 | -257.7422431193 |
| 6.90 | -257.6949201516 | -257.0875115890 | -257.7196748361 | -257.0935704800 | -257.7422430004 |
| 7.00 | -257.6949200378 | -257.0875115890 | -257.7196747193 | -257.0935704780 | -257.7422428926 |
| 7.10 | -257.6949199358 | -257.0875115890 | -257.7196746142 | -257.0935704770 | -257.7422427954 |
| 7.20 | -257.6949198424 | -257.0875115890 | -257.7196745186 | -257.0935704760 | -257.7422427072 |
| 7.30 | -257.6949197581 | -257.0875115890 | -257.7196744324 | -257.0935704760 | -257.7422426272 |
| 7.40 | -257.6949196819 | -257.0875115880 | -257.7196743543 | -257.0935704750 | -257.7422425545 |
| 7.50 | -257.6949196126 | -257.0875115880 | -257.7196742834 | -257.0935704750 | -257.7422424884 |
| 7.60 | -257.6949195505 | -257.0875115880 | -257.7196742193 | -257.0935704750 | -257.7422424283 |
| 7.70 | -257.6949194927 | -257.0875115880 | -257.7196741604 | -257.0935704750 | -257.7422423739 |
| 7.80 | -257.6949194402 | -257.0875115880 | -257.7196741070 | -257.0935704750 | -257.7422423240 |
| 7.90 | -257.6949193925 | -257.0875115880 | -257.7196740582 | -257.0935704750 | -257.7422422785 |
| 8.00 | -257.6949193490 | -257.0875115880 | -257.7196740137 | -257.0935704750 | -257.7422422367 |
| 8.10 | -257.6949193099 | -257.0875115880 | -257.7196739734 | -257.0935704750 | -257.7422421985 |
| 8.20 | -257.6949192729 | -257.0875115880 | -257.7196739358 | -257.0935704750 | -257.7422421639 |
| 8.30 | -257.6949192392 | -257.0875115880 | -257.7196739016 | -257.0935704750 | -257.7422421318 |
| 8.40 | -257.6949192085 | -257.0875115880 | -257.7196738703 | -257.0935704750 | -257.7422421025 |
| 8.50 | -257.6949191803 | -257.0875115880 | -257.7196738415 | -257.0935704750 | -257.7422420753 |
| 8.60 | -257.6949191551 | -257.0875115880 | -257.7196738153 | -257.0935704750 | -257.7422420503 |
| 8.70 | -257.6949191307 | -257.0875115880 | -257.7196737906 | -257.0935704750 | -257.7422420276 |
| 8.80 | -257.6949191084 | -257.0875115880 | -257.7196737682 | -257.0935704750 | -257.7422420065 |
| 8.90 | -257.6949190881 | -257.0875115880 | -257.7196737475 | -257.0935704750 | -257.7422419871 |
| 9.00 | -257.6949190693 | -257.0875115880 | -257.7196737284 | -257.0935704750 | -257.7422419691 |

|       |                 |                 |                 |                 |                 |
|-------|-----------------|-----------------|-----------------|-----------------|-----------------|
| 9.10  | -257.6949190520 | -257.0875115880 | -257.7196737107 | -257.0935704750 | -257.7422419525 |
| 9.20  | -257.6949190359 | -257.0875115880 | -257.7196736944 | -257.0935704750 | -257.7422419370 |
| 9.30  | -257.6949190211 | -257.0875115880 | -257.7196736792 | -257.0935704750 | -257.7422419227 |
| 9.40  | -257.6949190074 | -257.0875115880 | -257.7196736652 | -257.0935704750 | -257.7422419095 |
| 9.50  | -257.6949189947 | -257.0875115880 | -257.7196736523 | -257.0935704750 | -257.7422418972 |
| 9.60  | -257.6949189828 | -257.0875115880 | -257.7196736402 | -257.0935704750 | -257.7422418865 |
| 9.70  | -257.6949189719 | -257.0875115880 | -257.7196736294 | -257.0935704750 | -257.7422418751 |
| 9.80  | -257.6949189616 | -257.0875115880 | -257.7196736186 | -257.0935704750 | -257.7422418654 |
| 9.90  | -257.6949189521 | -257.0875115880 | -257.7196736090 | -257.0935704750 | -257.7422418553 |
| 10.00 | -257.6949189441 | -257.0875115880 | -257.7196735999 | -257.0935704750 | -257.7422418473 |
| 10.10 | -257.6949189353 | -257.0875115880 | -257.7196735915 | -257.0935704750 | -257.7422418396 |
| 10.20 | -257.6949189273 | -257.0875115880 | -257.7196735837 | -257.0935704750 | -257.7422418322 |
| 10.30 | -257.6949189201 | -257.0875115880 | -257.7196735764 | -257.0935704750 | -257.7422418253 |
| 10.40 | -257.6949189134 | -257.0875115880 | -257.7196735696 | -257.0935704750 | -257.7422418189 |
| 10.50 | -257.6949189071 | -257.0875115880 | -257.7196735632 | -257.0935704750 | -257.7422418129 |
| 10.60 | -257.6949189013 | -257.0875115880 | -257.7196735573 | -257.0935704750 | -257.7422418079 |
| 10.70 | -257.6949188959 | -257.0875115880 | -257.7196735521 | -257.0935704750 | -257.7422418019 |
| 10.80 | -257.6949188908 | -257.0875115880 | -257.7196735465 | -257.0935704750 | -257.7422417971 |
| 10.90 | -257.6949188860 | -257.0875115880 | -257.7196735418 | -257.0935704750 | -257.7422417923 |
| 11.00 | -257.6949188815 | -257.0875115880 | -257.7196735371 | -257.0935704750 | -257.7422417797 |
| 11.10 | -257.6949188773 | -257.0875115880 | -257.7196735288 | -257.0935704750 | -257.7422417762 |
| 11.20 | -257.6949188733 | -257.0875115880 | -257.7196735251 | -257.0935704750 | -257.7422417728 |
| 11.30 | -257.6949188696 | -257.0875115880 | -257.7196735215 | -257.0935704750 | -257.7422417696 |
| 11.40 | -257.6949188661 | -257.0875115880 | -257.7196735182 | -257.0935704750 | -257.7422417730 |
| 11.50 | -257.6949188628 | -257.0875115880 | -257.7196735182 | -257.0935704750 | -257.7422417698 |
| 11.60 | -257.6949188598 | -257.0875115880 | -257.7196735150 | -257.0935704750 | -257.7422417675 |
| 11.70 | -257.6949188569 | -257.0875115880 | -257.7196735124 | -257.0935704750 | -257.7422417640 |
| 11.80 | -257.6949188541 | -257.0875115880 | -257.7196735093 | -257.0935704750 | -257.7422417615 |
| 11.90 | -257.6949188515 | -257.0875115880 | -257.7196735068 | -257.0935704750 | -257.7422417589 |

Table S8: Ne-Ar electronic energies (in hartree) calculated at CCSD(T)/aug-cc-pV4Z (CCSD(T)-4Z), CCSD(T)/aug-cc-pV5Z (CCSD(T)-5Z), and CCSD(T)/CBS levels.

| R(Å) | CCSD(T)-4Z      | SCF-4Z          | CCSD(T)-5Z      | SCF-5Z          | CBS             |
|------|-----------------|-----------------|-----------------|-----------------|-----------------|
| 2.00 | -655.8678603251 | -655.2991724750 | -655.8893126982 | -655.8893126982 | -655.9097933072 |
| 2.10 | -655.8860183300 | -655.3186612080 | -655.9073121981 | -655.9073121981 | -655.9276430673 |
| 2.20 | -655.8983450195 | -655.3320388020 | -655.9195170341 | -655.9195170341 | -655.9397301125 |
| 2.30 | -655.9066625598 | -655.3411916920 | -655.9277406831 | -655.9277406831 | -655.9478616330 |
| 2.40 | -655.9122399805 | -655.3474373050 | -655.9332456317 | -655.9332456317 | -655.9532947250 |
| 2.50 | -655.9159547590 | -655.3516894830 | -655.9369043991 | -655.9369043991 | -655.9568975754 |
| 2.60 | -655.9184100630 | -655.3545786160 | -655.9393164205 | -655.9393164205 | -655.9592661334 |
| 2.70 | -655.9200182925 | -655.3565375040 | -655.9408912847 | -655.9408912847 | -655.9608070679 |
| 2.80 | -655.9210600272 | -655.3578623090 | -655.9419073953 | -655.9419073953 | -655.9617962845 |
| 2.90 | -655.9217253059 | -655.3587554900 | -655.9425530861 | -655.9425530861 | -655.9624201512 |
| 3.00 | -655.9221422508 | -655.3593555990 | -655.9429550836 | -655.9429550836 | -655.9628040426 |
| 3.10 | -655.9223968202 | -655.3597575520 | -655.9431982677 | -655.9431982677 | -655.9630321500 |
| 3.20 | -655.9225463902 | -655.3600262740 | -655.9433391595 | -655.9433391595 | -655.9631607054 |
| 3.30 | -655.9226289673 | -655.3602059170 | -655.9434150739 | -655.9434150739 | -655.9632268231 |
| 3.40 | -655.9226695916 | -655.3603262150 | -655.9434505196 | -655.9434505196 | -655.9632547368 |
| 3.41 | -655.9226720234 | -655.3603358100 | -655.9434524955 | -655.9434524955 | -655.9632560657 |
| 3.42 | -655.9226742259 | -655.3603450310 | -655.9434542561 | -655.9434542561 | -655.9632572016 |
| 3.43 | -655.9226762014 | -655.3603538920 | -655.9434558001 | -655.9434558001 | -655.9632581389 |
| 3.44 | -655.9226779612 | -655.3603624070 | -655.9434571384 | -655.9434571384 | -655.9632588878 |
| 3.45 | -655.9226795164 | -655.3603705910 | -655.9434582818 | -655.9434582818 | -655.9632594592 |



|      |                 |                 |                 |                 |                 |
|------|-----------------|-----------------|-----------------|-----------------|-----------------|
| 3.46 | -655.9226808776 | -655.3603784560 | -655.9434592404 | -655.9434592404 | -655.9632598623 |
| 3.47 | -655.9226820550 | -655.3603860140 | -655.9434600242 | -655.9434600242 | -655.9632601061 |
| 3.48 | -655.9226830583 | -655.3603932790 | -655.9434606425 | -655.9434606425 | -655.9632602002 |
| 3.49 | -655.9226838967 | -655.3604002600 | -655.9434611041 | -655.9434611041 | -655.9632601520 |
| 3.50 | -655.9226845790 | -655.3604069700 | -655.9434614178 | -655.9434614178 | -655.9632599705 |
| 3.51 | -655.9226851133 | -655.3604134190 | -655.9434615916 | -655.9434615916 | -655.9632596631 |
| 3.52 | -655.9226855079 | -655.3604196170 | -655.9434616333 | -655.9434616333 | -655.9632592375 |
| 3.53 | -655.9226857702 | -655.3604255740 | -655.9434615505 | -655.9434615505 | -655.9632587010 |
| 3.54 | -655.9226859076 | -655.3604312980 | -655.9434613502 | -655.9434613502 | -655.9632580593 |
| 3.55 | -655.9226859355 | -655.3604368000 | -655.9434610393 | -655.9434610393 | -655.9632573104 |
| 3.56 | -655.9226858437 | -655.3604420880 | -655.9434606242 | -655.9434606242 | -655.9632564792 |
| 3.57 | -655.9226856472 | -655.3604471700 | -655.9434601112 | -655.9434601112 | -655.9632555611 |
| 3.58 | -655.9226853520 | -655.3604520540 | -655.9434595062 | -655.9434595062 | -655.9632545619 |
| 3.59 | -655.9226849640 | -655.3604567470 | -655.9434588148 | -655.9434588148 | -655.9632534869 |
| 3.60 | -655.9226844787 | -655.3604612570 | -655.9434580454 | -655.9434580454 | -655.9632523583 |
| 3.70 | -655.9226759890 | -655.3604976880 | -655.9434468857 | -655.9434468857 | -655.9632379366 |
| 3.80 | -655.9226632845 | -655.3605219810 | -655.9434319953 | -655.9434319953 | -655.9632111715 |
| 3.90 | -655.9226489263 | -655.3605379930 | -655.9434158345 | -655.9434158345 | -655.9632021148 |
| 4.00 | -655.9226344165 | -655.3605483680 | -655.9433998281 | -655.9433998281 | -655.9631842303 |
| 4.10 | -655.9226205859 | -655.3605549420 | -655.9433847453 | -655.9433847453 | -655.9631674844 |
| 4.20 | -655.9226078709 | -655.3605589900 | -655.9433709859 | -655.9433709859 | -655.9631522512 |
| 4.30 | -655.9225964240 | -655.3605613900 | -655.9433586739 | -655.9433586739 | -655.9631386433 |
| 4.40 | -655.9225862717 | -655.3605627320 | -655.9433478036 | -655.9433478036 | -655.9631266359 |
| 4.50 | -655.9225773530 | -655.3605634070 | -655.9433382774 | -655.9433382774 | -655.9631161054 |
| 4.60 | -655.9225695611 | -655.3605636700 | -655.9433300147 | -655.9433300147 | -655.9631070074 |
| 4.70 | -655.9225627938 | -655.3605636840 | -655.9433228359 | -655.9433228359 | -655.9630990855 |
| 4.80 | -655.922569160  | -655.3605635540 | -655.9433166295 | -655.9433166295 | -655.9630922580 |
| 4.90 | -655.9225518194 | -655.3605633450 | -655.9433112640 | -655.9433112640 | -655.9630863687 |
| 5.00 | -655.9225474022 | -655.3605631000 | -655.9433066318 | -655.9433066318 | -655.9630813049 |
| 5.10 | -655.9225435615 | -655.3605628450 | -655.9433026127 | -655.9433026127 | -655.9630769243 |
| 5.20 | -655.9225402339 | -655.3605625930 | -655.9432991370 | -655.9432991370 | -655.9630731473 |
| 5.30 | -655.9225373368 | -655.3605623530 | -655.9432961164 | -655.9432961164 | -655.9630698740 |
| 5.40 | -655.9225348124 | -655.3605621290 | -655.9432934905 | -655.9432934905 | -655.9630670371 |
| 5.50 | -655.9225326081 | -655.3605619220 | -655.9432912019 | -655.9432912019 | -655.9630645701 |
| 5.60 | -655.9225306765 | -655.3605617330 | -655.9432892014 | -655.9432892014 | -655.9630624199 |
| 5.70 | -655.9225289890 | -655.3605615610 | -655.9432874536 | -655.9432874536 | -655.9630605404 |
| 5.80 | -655.9225275030 | -655.3605614070 | -655.9432859174 | -655.9432859174 | -655.9630588918 |
| 5.90 | -655.9225261881 | -655.3605612700 | -655.9432845670 | -655.9432845670 | -655.9630574525 |
| 6.00 | -655.9225250348 | -655.3605611490 | -655.9432833763 | -655.9432833763 | -655.9630561782 |
| 6.10 | -655.9225240149 | -655.3605610460 | -655.9432823231 | -655.9432823231 | -655.9630550541 |
| 6.20 | -655.9225231150 | -655.3605609570 | -655.9432813934 | -655.9432813934 | -655.9630540635 |
| 6.30 | -655.9225223104 | -655.3605608830 | -655.9432805664 | -655.9432805664 | -655.9630531904 |
| 6.40 | -655.9225215949 | -655.3605608220 | -655.9432798315 | -655.9432798315 | -655.9630524182 |
| 6.50 | -655.9225209568 | -655.3605607730 | -655.9432791766 | -655.9432791766 | -655.9630517344 |
| 6.60 | -655.9225203824 | -655.3605607340 | -655.9432785911 | -655.9432785911 | -655.9630511306 |
| 6.70 | -655.9225198770 | -655.3605607030 | -655.9432780693 | -655.9432780693 | -655.9630505877 |
| 6.80 | -655.9225194193 | -655.3605606790 | -655.9432776004 | -655.9432776004 | -655.9630501059 |
| 6.90 | -655.9225190085 | -655.3605606620 | -655.9432771798 | -655.9432771798 | -655.9630496762 |
| 7.00 | -655.9225186388 | -655.3605606480 | -655.9432768016 | -655.9432768016 | -655.9630492906 |
| 7.10 | -655.9225183014 | -655.3605606390 | -655.9432764602 | -655.9432764602 | -655.9630489481 |
| 7.20 | -655.9225180052 | -655.3605606320 | -655.9432761537 | -655.9432761537 | -655.9630486341 |
| 7.30 | -655.9225177332 | -655.3605606270 | -655.9432758758 | -655.9432758758 | -655.9630483527 |
| 7.40 | -655.9225174871 | -655.3605606230 | -655.9432756245 | -655.9432756245 | -655.9630480983 |
| 7.50 | -655.9225172639 | -655.3605606210 | -655.9432753967 | -655.9432753967 | -655.9630478684 |

|       |                 |                 |                 |                 |                 |
|-------|-----------------|-----------------|-----------------|-----------------|-----------------|
| 7.60  | -655.9225170570 | -655.3605606190 | -655.9432751894 | -655.9432751894 | -655.9630476630 |
| 7.70  | -655.9225168773 | -655.3605606180 | -655.9432750023 | -655.9432750023 | -655.9630474698 |
| 7.80  | -655.9225167093 | -655.3605606180 | -655.9432748311 | -655.9432748311 | -655.9630472969 |
| 7.90  | -655.9225165564 | -655.3605606170 | -655.9432746754 | -655.9432746754 | -655.9630471392 |
| 8.00  | -655.9225164169 | -655.3605606170 | -655.9432745332 | -655.9432745332 | -655.9630469954 |
| 8.10  | -655.9225162851 | -655.3605606170 | -655.9432744028 | -655.9432744028 | -655.9630468671 |
| 8.20  | -655.9225161728 | -655.3605606170 | -655.9432742848 | -655.9432742848 | -655.9630467436 |
| 8.30  | -655.9225160658 | -655.3605606170 | -655.9432741758 | -655.9432741758 | -655.9630466332 |
| 8.40  | -655.9225159678 | -655.3605606170 | -655.9432740762 | -655.9432740762 | -655.9630465323 |
| 8.50  | -655.9225158778 | -655.3605606170 | -655.9432739846 | -655.9432739846 | -655.9630464392 |
| 8.60  | -655.9225157908 | -655.3605606170 | -655.9432739000 | -655.9432739000 | -655.9630463577 |
| 8.70  | -655.9225157192 | -655.3605606170 | -655.9432738235 | -655.9432738235 | -655.9630462759 |
| 8.80  | -655.9225156490 | -655.3605606170 | -655.9432737521 | -655.9432737521 | -655.9630462033 |
| 8.90  | -655.9225155844 | -655.3605606170 | -655.9432736865 | -655.9432736865 | -655.9630461367 |
| 9.00  | -655.9225155248 | -655.3605606170 | -655.9432736260 | -655.9432736260 | -655.9630460752 |
| 9.10  | -655.9225154698 | -655.3605606170 | -655.9432735702 | -655.9432735702 | -655.9630460185 |
| 9.20  | -655.9225154189 | -655.3605606170 | -655.9432735185 | -655.9432735185 | -655.9630459661 |
| 9.30  | -655.9225153719 | -655.3605606170 | -655.9432734708 | -655.9432734708 | -655.9630459176 |
| 9.40  | -655.9225153283 | -655.3605606170 | -655.9432734266 | -655.9432734266 | -655.9630458727 |
| 9.50  | -655.9225152879 | -655.3605606170 | -655.9432733856 | -655.9432733856 | -655.9630458312 |
| 9.60  | -655.9225152505 | -655.3605606170 | -655.9432733478 | -655.9432733478 | -655.9630457930 |
| 9.70  | -655.9225152158 | -655.3605606170 | -655.9432733124 | -655.9432733124 | -655.9630457567 |
| 9.80  | -655.9225151834 | -655.3605606170 | -655.9432732796 | -655.9432732796 | -655.9630457237 |
| 9.90  | -655.9225151533 | -655.3605606170 | -655.9432732492 | -655.9432732492 | -655.9630456928 |
| 10.00 | -655.9225151254 | -655.3605606170 | -655.9432732209 | -655.9432732209 | -655.9630456641 |
| 10.10 | -655.9225150993 | -655.3605606170 | -655.9432731945 | -655.9432731945 | -655.9630456373 |
| 10.20 | -655.9225150751 | -655.3605606170 | -655.9432731699 | -655.9432731699 | -655.9630456124 |
| 10.30 | -655.9225150525 | -655.3605606170 | -655.9432731470 | -655.9432731470 | -655.9630455892 |
| 10.40 | -655.9225150314 | -655.3605606170 | -655.9432731256 | -655.9432731256 | -655.9630455676 |
| 10.50 | -655.9225150116 | -655.3605606170 | -655.9432731057 | -655.9432731057 | -655.9630455473 |
| 10.60 | -655.9225149932 | -655.3605606170 | -655.9432730872 | -655.9432730872 | -655.9630455288 |
| 10.70 | -655.9225149761 | -655.3605606170 | -655.9432730696 | -655.9432730696 | -655.9630455106 |
| 10.80 | -655.9225149599 | -655.3605606170 | -655.9432730533 | -655.9432730533 | -655.9630454943 |
| 10.90 | -655.9225149448 | -655.3605606170 | -655.9432730380 | -655.9432730380 | -655.9630454788 |
| 11.00 | -655.9225149306 | -655.3605606170 | -655.9432730237 | -655.9432730237 | -655.9630454644 |
| 11.10 | -655.9225149174 | -655.3605606170 | -655.9432730103 | -655.9432730103 | -655.9630454507 |
| 11.20 | -655.9225149049 | -655.3605606170 | -655.9432729977 | -655.9432729977 | -655.9630454380 |
| 11.30 | -655.9225148933 | -655.3605606170 | -655.9432729859 | -655.9432729859 | -655.9630454261 |
| 11.40 | -655.9225148823 | -655.3605606170 | -655.9432729748 | -655.9432729748 | -655.9630454149 |
| 11.50 | -655.9225148720 | -655.3605606170 | -655.9432729644 | -655.9432729644 | -655.9630454044 |
| 11.60 | -655.9225148623 | -655.3605606170 | -655.9432729548 | -655.9432729548 | -655.9630453949 |
| 11.70 | -655.9225148533 | -655.3605606170 | -655.9432729454 | -655.9432729454 | -655.9630453850 |
| 11.80 | -655.9225148446 | -655.3605606170 | -655.9432729368 | -655.9432729368 | -655.9630453764 |
| 11.90 | -655.9225148366 | -655.3605606170 | -655.9432729286 | -655.9432729286 | -655.9630453681 |
| 12.00 | -655.9225148290 | -655.3605606170 | -655.9432729209 | -655.9432729209 | -655.9630453604 |

Table S9: Ne-Kr electronic energies (in Hartree) calculated at CCSD(T)/aug-cc-pV4Z (CCSD(T)-4Z), CCSD(T)/aug-cc-pV5Z (CCSD(T)-5Z), and CCSD(T)/CBS levels.

| R(Å) | CCSD(T)-4Z      | SCF-4Z          | CCSD(T)-5Z      | SCF-5Z          | CBS             |
|------|-----------------|-----------------|-----------------|-----------------|-----------------|
| 2.00 | -2881.151717788 | -2880.506408620 | -2881.250978357 | -2880.509592860 | -2881.353331707 |
| 2.10 | -2881.177406849 | -2880.533798470 | -2881.276487968 | -2880.536989490 | -2881.378649236 |
| 2.20 | -2881.195405944 | -2880.553194960 | -2881.294335295 | -2880.556389640 | -2881.396335274 |
| 2.30 | -2881.207937990 | -2880.566868520 | -2881.306735974 | -2880.570061470 | -2881.408599097 |

|      |                 |                 |                 |                 |                 |
|------|-----------------|-----------------|-----------------|-----------------|-----------------|
| 2.40 | -2881.216612163 | -2880.576472790 | -2881.315296369 | -2880.579659700 | -2881.417043511 |
| 2.50 | -2881.222579702 | -2880.583197760 | -2881.321167473 | -2880.586377010 | -2881.422817742 |
| 2.60 | -2881.226657984 | -2880.587893260 | -2881.325166562 | -2880.591065660 | -2881.426737590 |
| 2.70 | -2881.229424188 | -2880.591163060 | -2881.327870061 | -2880.594330790 | -2881.429377925 |
| 2.80 | -2881.231284207 | -2880.593434300 | -2881.329681755 | -2880.596599950 | -2881.431140086 |
| 2.90 | -2881.232522065 | -2880.595007940 | -2881.330883179 | -2880.598174030 | -2881.432303037 |
| 3.00 | -2881.233335554 | -2880.596095360 | -2881.331669606 | -2880.599264120 | -2881.433059569 |
| 3.10 | -2881.233861664 | -2880.596844720 | -2881.332175733 | -2880.600017890 | -2881.433542253 |
| 3.20 | -2881.234194768 | -2880.597359780 | -2881.332494135 | -2880.600538430 | -2881.433842153 |
| 3.30 | -2881.234399498 | -2880.597713090 | -2881.332687969 | -2880.600897490 | -2881.434021324 |
| 3.40 | -2881.234519884 | -2880.597955240 | -2881.332800188 | -2880.601144910 | -2881.434122014 |
| 3.50 | -2881.234585677 | -2880.598121280 | -2881.332859755 | -2880.601315200 | -2881.434172662 |
| 3.60 | -2881.234616840 | -2880.598235300 | -2881.332886049 | -2880.601432250 | -2881.434192145 |
| 3.61 | -2881.234618608 | -2880.598244520 | -2881.332887406 | -2880.601441710 | -2881.434192935 |
| 3.62 | -2881.234620174 | -2880.598253410 | -2881.332888530 | -2880.601450830 | -2881.434193465 |
| 3.63 | -2881.234621551 | -2880.598261970 | -2881.332889522 | -2880.601459600 | -2881.434193935 |
| 3.64 | -2881.234622748 | -2880.598270220 | -2881.332890295 | -2880.601468060 | -2881.434194147 |
| 3.65 | -2881.234623773 | -2880.598278160 | -2881.332890928 | -2880.601476200 | -2881.434194256 |
| 3.66 | -2881.234624635 | -2880.598285810 | -2881.332891407 | -2880.601484030 | -2881.434194232 |
| 3.67 | -2881.234625343 | -2880.598293180 | -2881.332891739 | -2880.601491580 | -2881.434194070 |
| 3.68 | -2881.234625904 | -2880.598300290 | -2881.332891933 | -2880.601498850 | -2881.434193788 |
| 3.69 | -2881.234626327 | -2880.598307130 | -2881.332891996 | -2880.601505850 | -2881.434193383 |
| 3.70 | -2881.234626618 | -2880.598313720 | -2881.332891934 | -2880.601512590 | -2881.434192866 |
| 3.71 | -2881.234626784 | -2880.598320070 | -2881.332891754 | -2880.601519080 | -2881.434192244 |
| 3.72 | -2881.234626833 | -2880.598326190 | -2881.332891463 | -2880.601525320 | -2881.434191530 |
| 3.73 | -2881.234626771 | -2880.598332080 | -2881.332891068 | -2880.601531340 | -2881.434190712 |
| 3.74 | -2881.234626603 | -2880.598337750 | -2881.332890574 | -2880.601537130 | -2881.434189808 |
| 3.75 | -2881.234626336 | -2880.598343220 | -2881.332889986 | -2880.601542710 | -2881.434188823 |
| 3.76 | -2881.234625975 | -2880.598348490 | -2881.332889311 | -2880.601548080 | -2881.434187762 |
| 3.77 | -2881.234625524 | -2880.598353560 | -2881.332888553 | -2880.601553250 | -2881.434186626 |
| 3.78 | -2881.234624992 | -2880.598358450 | -2881.332887718 | -2880.601558230 | -2881.434185422 |
| 3.79 | -2881.234624382 | -2880.598363160 | -2881.332886810 | -2880.601563020 | -2881.434184156 |
| 3.80 | -2881.234623696 | -2880.598478200 | -2881.332885855 | -2752.054899610 | -2953.650910695 |
| 3.90 | -2881.234613686 | -2880.598478220 | -2881.332873195 | -2880.601605270 | -2881.434208384 |
| 4.00 | -2881.234600144 | -2880.598478050 | -2881.332857425 | -2880.601630970 | -2881.434175741 |
| 4.10 | -2881.234585255 | -2880.598477530 | -2881.332840653 | -2880.601648470 | -2881.434146871 |
| 4.20 | -2881.234570340 | -2880.598476480 | -2881.332824178 | -2880.601660380 | -2881.434121478 |
| 4.30 | -2881.234556133 | -2880.598474610 | -2881.332808632 | -2880.601668480 | -2881.434098927 |
| 4.40 | -2881.234543016 | -2880.598471500 | -2881.332794420 | -2880.601673980 | -2881.434078728 |
| 4.50 | -2881.234531148 | -2880.598466550 | -2881.332781630 | -2880.601677720 | -2881.434060089 |
| 4.60 | -2881.234520554 | -2880.598458920 | -2881.332770269 | -2880.601680260 | -2881.434042210 |
| 4.70 | -2881.234511184 | -2880.598447370 | -2881.332760281 | -2880.601681980 | -2881.434024118 |
| 4.80 | -2881.234502946 | -2880.598430150 | -2881.332751527 | -2880.601683140 | -2881.434004498 |
| 4.90 | -2881.234495730 | -2880.598404780 | -2881.332743883 | -2880.601683910 | -2881.433981719 |
| 5.00 | -2881.234489427 | -2752.054720900 | -2881.332737236 | -2880.601684410 | -2809.218985165 |
| 5.10 | -2881.234483925 | -2880.598478070 | -2881.332731461 | -2880.601684720 | -2881.434009369 |
| 5.20 | -2881.234479129 | -2880.598477890 | -2881.332726438 | -2880.601684910 | -2881.434003899 |
| 5.30 | -2881.234474939 | -2880.598477700 | -2881.332722062 | -2880.601685010 | -2881.433999165 |
| 5.40 | -2881.234471285 | -2880.598477520 | -2881.332718250 | -2880.601685050 | -2881.433995065 |
| 5.50 | -2881.234468090 | -2880.598477360 | -2881.332714926 | -2880.601685060 | -2881.433991508 |
| 5.60 | -2881.234465295 | -2880.598477220 | -2881.332712019 | -2880.601685050 | -2881.433988411 |
| 5.70 | -2881.234462842 | -2880.598477090 | -2881.332709478 | -2880.601685020 | -2881.433985722 |
| 5.80 | -2881.234460689 | -2880.598476980 | -2881.332707247 | -2880.601684980 | -2881.433983370 |
| 5.90 | -2881.234458793 | -2880.598476880 | -2881.332705286 | -2880.601684950 | -2881.433981301 |

|       |                 |                 |                 |                 |                 |
|-------|-----------------|-----------------|-----------------|-----------------|-----------------|
| 6.00  | -2881.234457122 | -2880.598476790 | -2881.332703559 | -2880.601684910 | -2881.433979488 |
| 6.10  | -2881.234455642 | -2880.598476700 | -2881.332702032 | -2880.601684880 | -2881.433977878 |
| 6.20  | -2881.234454330 | -2880.598476620 | -2881.332700686 | -2880.601684850 | -2881.433976468 |
| 6.30  | -2881.234453177 | -2880.598476540 | -2881.332699490 | -2880.601684820 | -2881.433975199 |
| 6.40  | -2881.234452145 | -2880.598476470 | -2881.332698428 | -2880.601684790 | -2881.433974083 |
| 6.50  | -2881.234451226 | -2880.598476410 | -2881.332697483 | -2880.601684770 | -2881.433973089 |
| 6.60  | -2881.234450401 | -2880.598476350 | -2881.332696638 | -2880.601684750 | -2881.433972199 |
| 6.70  | -2881.234449671 | -2880.598476300 | -2881.332695888 | -2880.601684730 | -2881.433971410 |
| 6.80  | -2881.234449014 | -2880.598476260 | -2881.332695213 | -2880.601684710 | -2881.433970706 |
| 6.90  | -2881.234448424 | -2880.598476220 | -2881.332694608 | -2880.601684690 | -2881.433970075 |
| 7.00  | -2881.234447894 | -2880.598476180 | -2881.332694065 | -2880.601684670 | -2881.433969507 |
| 7.10  | -2881.234447412 | -2880.598476160 | -2881.332693574 | -2880.601684660 | -2881.433969000 |
| 7.20  | -2881.234446986 | -2880.598476130 | -2881.332693136 | -2880.601684640 | -2881.433968545 |
| 7.30  | -2881.234446597 | -2880.598476110 | -2881.332692737 | -2880.601684630 | -2881.433968130 |
| 7.40  | -2881.234446245 | -2880.598476100 | -2881.332692378 | -2880.601684620 | -2881.433967763 |
| 7.50  | -2881.234445926 | -2880.598476090 | -2881.332692052 | -2880.601684610 | -2881.433967429 |
| 7.60  | -2881.234445632 | -2880.598476080 | -2881.332691754 | -2880.601684600 | -2881.433967127 |
| 7.70  | -2881.234445374 | -2880.598476070 | -2881.332691489 | -2880.601684600 | -2881.433966849 |
| 7.80  | -2881.234445134 | -2880.598476070 | -2881.332691244 | -2880.601684590 | -2881.433966603 |
| 7.90  | -2881.234444916 | -2880.598476060 | -2881.332691022 | -2880.601684580 | -2881.433966377 |
| 8.00  | -2881.234444718 | -2880.598476060 | -2881.332690819 | -2880.601684580 | -2881.433966170 |
| 8.10  | -2881.234444532 | -2880.598476060 | -2881.332690631 | -2880.601684580 | -2881.433965981 |
| 8.20  | -2881.234444370 | -2880.598476060 | -2881.332690465 | -2880.601684570 | -2881.433965816 |
| 8.30  | -2881.234444218 | -2880.598476050 | -2881.332690309 | -2880.601684570 | -2881.433965651 |
| 8.40  | -2881.234444079 | -2880.598476050 | -2881.332690168 | -2880.601684570 | -2881.433965506 |
| 8.50  | -2881.234443951 | -2880.598476050 | -2881.332690038 | -2880.601684570 | -2881.433965374 |
| 8.60  | -2881.234443829 | -2880.598476050 | -2881.332689916 | -2880.601684570 | -2881.433965252 |
| 8.70  | -2881.234443725 | -2880.598476050 | -2881.332689809 | -2880.601684560 | -2881.433965147 |
| 8.80  | -2881.234443626 | -2880.598476050 | -2881.332689707 | -2880.601684560 | -2881.433965043 |
| 8.90  | -2881.234443534 | -2880.598476050 | -2881.332689614 | -2880.601684560 | -2881.433964948 |
| 9.00  | -2881.234443450 | -2880.598476050 | -2881.332689528 | -2880.601684560 | -2881.433964861 |
| 9.10  | -2881.234443372 | -2880.598476050 | -2881.332689446 | -2880.601684560 | -2881.433964775 |
| 9.20  | -2881.234443300 | -2880.598476050 | -2881.332689376 | -2880.601684560 | -2881.433964706 |
| 9.30  | -2881.234443233 | -2880.598476050 | -2881.332689308 | -2880.601684560 | -2881.433964636 |
| 9.40  | -2881.234443172 | -2880.598476050 | -2881.332689245 | -2880.601684560 | -2881.433964573 |
| 9.50  | -2881.234443114 | -2880.598476050 | -2881.332689187 | -2880.601684560 | -2881.433964514 |
| 9.60  | -2881.234443061 | -2880.598476050 | -2881.332689131 | -2880.601684560 | -2881.433964455 |
| 9.70  | -2881.234443012 | -2880.598476050 | -2881.332689083 | -2880.601684560 | -2881.433964409 |
| 9.80  | -2881.234442967 | -2880.598476050 | -2881.332689037 | -2880.601684560 | -2881.433964361 |
| 9.90  | -2881.234442924 | -2880.598476050 | -2881.332688994 | -2880.601684560 | -2881.433964318 |
| 10.00 | -2881.234442885 | -2880.598476050 | -2881.332688954 | -2880.601684560 | -2881.433964277 |
| 10.10 | -2881.234442848 | -2880.598476050 | -2881.332688914 | -2880.601684560 | -2881.433964235 |
| 10.20 | -2881.234442814 | -2880.598476050 | -2881.332688882 | -2880.601684560 | -2881.433964204 |
| 10.30 | -2881.234442782 | -2880.598476050 | -2881.332688849 | -2880.601684560 | -2881.433964171 |
| 10.40 | -2881.234442752 | -2880.598476050 | -2881.332688819 | -2880.601684560 | -2881.433964140 |
| 10.50 | -2881.234442724 | -2880.598476050 | -2881.332688791 | -2880.601684560 | -2881.433964112 |
| 10.60 | -2881.234442698 | -2880.598476050 | -2881.332688762 | -2880.601684560 | -2881.433964080 |
| 10.70 | -2881.234442674 | -2880.598476050 | -2881.332688740 | -2880.601684560 | -2881.433964060 |
| 10.80 | -2881.234442651 | -2880.598476050 | -2881.332688717 | -2880.601684560 | -2881.433964037 |
| 10.90 | -2881.234442630 | -2880.598476050 | -2881.332688695 | -2880.601684560 | -2881.433964015 |
| 11.00 | -2881.234442610 | -2880.598476050 | -2881.332688675 | -2880.601684560 | -2881.433963994 |
| 11.10 | -2881.234442591 | -2880.598476050 | -2881.332688654 | -2880.601684560 | -2881.433963971 |
| 11.20 | -2881.234442573 | -2880.598476050 | -2881.332688638 | -2880.601684560 | -2881.433963957 |
| 11.30 | -2881.234442557 | -2880.598476050 | -2881.332688622 | -2880.601684560 | -2881.433963940 |

|       |                 |                 |                 |                 |                 |
|-------|-----------------|-----------------|-----------------|-----------------|-----------------|
| 11.40 | -2881.234442542 | -2880.598476050 | -2881.332688606 | -2880.601684560 | -2881.433963924 |
| 11.50 | -2881.234442527 | -2880.598476050 | -2881.332688591 | -2880.601684560 | -2881.433963909 |
| 11.60 | -2881.234442513 | -2880.598476050 | -2881.332688575 | -2880.601684560 | -2881.433963891 |
| 11.70 | -2881.234442501 | -2880.598476050 | -2881.332688565 | -2880.601684560 | -2881.433963883 |
| 11.80 | -2881.234442489 | -2880.598476050 | -2881.332688552 | -2880.601684560 | -2881.433963870 |
| 11.90 | -2881.234442477 | -2880.598476050 | -2881.332688541 | -2880.601684560 | -2881.433963858 |
| 12.00 | -2881.234442466 | -2880.598476050 | -2881.332688530 | -2880.601684560 | -2881.433963847 |

Table S10: Ne-Xe electronic energies (in Hartree) calculated at CCSD(T)/aug-cc-pV4Z (CCSD(T)-4Z), CCSD(T)/aug-cc-pV5Z (CCSD(T)-5Z), and CCSD(T)/CBS levels.

| R(Å) | CCSD(T)-4Z      | SCF-4Z          | CCSD(T)-5Z      | SCF-5Z          | CBS             |
|------|-----------------|-----------------|-----------------|-----------------|-----------------|
| 2.00 | -457.3969047015 | -456.7044146190 | -457.4859568291 | -456.7075355530 | -457.5776352495 |
| 2.10 | -457.4326313399 | -456.7420063060 | -457.5214126407 | -456.7451028450 | -457.6128206200 |
| 2.20 | -457.4587109626 | -456.7697365770 | -457.5472733510 | -456.7728261730 | -457.6384555521 |
| 2.30 | -457.4776067072 | -456.7900578760 | -457.5659850732 | -456.7931430190 | -457.6569767033 |
| 2.40 | -457.4912053842 | -456.8048689380 | -457.5794256070 | -456.8079464470 | -457.6702556051 |
| 2.50 | -457.5009305031 | -456.8156148260 | -457.5890140808 | -456.8186814630 | -457.6797068215 |
| 2.60 | -457.5078426538 | -456.8233806400 | -457.5958090874 | -456.8264354750 | -457.6863855531 |
| 2.70 | -457.5127243515 | -456.8289730550 | -457.6005920185 | -456.8320176340 | -457.6910706218 |
| 2.80 | -457.5161486139 | -456.8329873580 | -457.6039347877 | -456.8360247850 | -457.6943319080 |
| 2.90 | -457.5185325113 | -456.8358603390 | -457.6062529827 | -456.8388941520 | -457.6965831996 |
| 3.00 | -457.5201779960 | -456.8379109000 | -457.6078466428 | -456.8409442840 | -457.6981227273 |
| 3.10 | -457.5213025597 | -456.8393707800 | -457.6089311102 | -456.8424062370 | -457.6991639620 |
| 3.20 | -457.5220620531 | -456.8404076580 | -457.6096599728 | -456.8434469730 | -457.6998585199 |
| 3.30 | -457.5225674685 | -456.8411424560 | -457.6101423303 | -456.8441867440 | -457.7003138917 |
| 3.40 | -457.5228974478 | -456.8416621520 | -457.6104551186 | -456.8447118860 | -457.7006055840 |
| 3.50 | -457.5231073860 | -456.8420291650 | -457.6106522829 | -456.8450842120 | -457.7007863615 |
| 3.60 | -457.5232360587 | -456.8422881480 | -457.6107714505 | -456.8453478720 | -457.7008929289 |
| 3.70 | -457.5233104498 | -456.8424708940 | -457.6108386850 | -456.8455343470 | -457.7009505599 |
| 3.80 | -457.5233491916 | -456.8425999120 | -457.6108719215 | -456.8456660580 | -457.7009765074 |
| 3.90 | -457.5233650352 | -456.8426910490 | -457.6108834103 | -456.8457589620 | -457.7009824346 |
| 3.91 | -457.5233657178 | -456.8426985400 | -457.6108837145 | -456.8457665870 | -457.7009822665 |
| 3.92 | -457.5233662681 | -456.8427057750 | -457.6108838880 | -456.8457739490 | -457.7009819733 |
| 3.93 | -457.5233666922 | -456.8427127630 | -457.6108839430 | -456.8457810580 | -457.7009815731 |
| 3.94 | -457.5233669954 | -456.8427195120 | -457.6108838843 | -456.8457879210 | -457.7009810707 |
| 3.95 | -457.5233671839 | -456.8427260300 | -457.6108837137 | -456.8457945480 | -457.7009804619 |
| 3.96 | -457.5233672635 | -456.8427323250 | -457.6108834475 | -456.8458009460 | -457.7009797751 |
| 3.97 | -457.5233672397 | -456.8427384050 | -457.6108830820 | -456.8458071230 | -457.7009789967 |
| 3.98 | -457.5233671179 | -456.8427442760 | -457.6108826258 | -456.8458130870 | -457.7009781375 |
| 3.99 | -457.5233669030 | -456.8427499460 | -457.6108820826 | -456.8458188450 | -457.7009772004 |
| 4.00 | -457.5233666000 | -456.8427554220 | -457.6108814551 | -456.8458244040 | -457.7009761856 |
| 4.01 | -457.5233662145 | -456.8427607100 | -457.6108807547 | -456.8458297700 | -457.7009751111 |
| 4.02 | -457.5233657489 | -456.8427658170 | -457.6108799786 | -456.8458349510 | -457.7009739676 |
| 4.03 | -457.5233652086 | -456.8427707480 | -457.6108791338 | -456.8458399530 | -457.7009727635 |
| 4.04 | -457.5233645986 | -456.8427755100 | -457.6108782243 | -456.8458447820 | -457.7009715020 |
| 4.05 | -457.5233639224 | -456.8427801080 | -457.6108772520 | -456.8458494440 | -457.7009701833 |
| 4.06 | -457.5233631836 | -456.8427845470 | -457.6108762092 | -456.8458539440 | -457.7009687873 |
| 4.07 | -457.5233623858 | -456.8427888340 | -457.6108751421 | -456.8458582880 | -457.7009674055 |
| 4.08 | -457.5233615326 | -456.8427929720 | -457.6108739946 | -456.8458624810 | -457.7009659183 |
| 4.09 | -457.5233606273 | -456.8427969680 | -457.6108728144 | -456.8458665290 | -457.7009644206 |
| 4.10 | -457.5233596733 | -456.8428008250 | -457.6108715899 | -456.8458704370 | -457.7009628836 |
| 4.20 | -457.5233480532 | -456.8428327410 | -457.6108575171 | -456.8458704370 | -457.7009641677 |
| 4.30 | -457.5233341949 | -456.8428550490 | -457.6108415613 | -456.8458742090 | -457.7009564245 |

|      |                 |                 |                 |                 |                 |
|------|-----------------|-----------------|-----------------|-----------------|-----------------|
| 4.40 | -457.5233196437 | -456.8428705200 | -457.6108251906 | -456.8458778500 | -457.7009447909 |
| 4.50 | -457.5233053204 | -456.8428811360 | -457.6108093208 | -456.8458813650 | -457.7009312878 |
| 4.60 | -457.5232917634 | -456.8428883280 | -457.6107944493 | -456.8458847570 | -457.7009171722 |
| 4.70 | -457.5232792473 | -456.8428931230 | -457.6107808262 | -456.8458880320 | -457.7009032414 |
| 4.80 | -457.5232678842 | -456.8428962590 | -457.6107685357 | -456.8458911930 | -457.7008899638 |
| 4.90 | -457.5232576841 | -456.8428982570 | -457.6107575664 | -456.8458942440 | -457.7008775960 |
| 5.00 | -457.5232486009 | -456.8428994870 | -457.6107478466 | -456.8458971880 | -457.7008662455 |
| 5.10 | -457.5232405551 | -456.8429002050 | -457.6107392774 | -456.8459000310 | -457.7008559331 |
| 5.20 | -457.5232334548 | -456.8429005870 | -457.6107317492 | -456.8459027740 | -457.7008466297 |
| 5.30 | -457.5232272032 | -456.8429007530 | -457.6107251453 | -456.8459768030 | -457.7007981604 |
| 5.40 | -457.5232217061 | -456.8429007830 | -457.6107193580 | -456.8459771970 | -457.7007918642 |
| 5.50 | -457.5232168745 | -456.8429007310 | -457.6107142862 | -456.8459774500 | -457.7007863690 |
| 5.60 | -457.5232126261 | -456.8429006330 | -457.6107098348 | -456.8459776050 | -457.7007815625 |
| 5.70 | -457.5232088900 | -456.8429005110 | -457.6107059386 | -456.8459776930 | -457.7007773804 |
| 5.80 | -457.5232056012 | -456.8429003790 | -457.6107025120 | -456.8459777360 | -457.7007737108 |
| 5.90 | -457.5232027029 | -456.8429002460 | -457.6106994968 | -456.8459777490 | -457.7007704909 |
| 6.00 | -457.5232001449 | -456.8429001180 | -457.6106968397 | -456.8459777420 | -457.7007676618 |
| 6.10 | -457.5231978837 | -456.8428999960 | -457.6106944954 | -456.8459777220 | -457.7007651732 |
| 6.20 | -457.5231958819 | -456.8428998830 | -457.6106924220 | -456.8459776960 | -457.7007629758 |
| 6.30 | -457.5231941065 | -456.8428997800 | -457.6106905855 | -456.8459776650 | -457.7007610348 |
| 6.40 | -457.5231925290 | -456.8428996850 | -457.6106889556 | -456.8459776330 | -457.7007593145 |
| 6.50 | -457.5231911252 | -456.8428995990 | -457.6106875067 | -456.8459776020 | -457.7007577872 |
| 6.60 | -457.5231898734 | -456.8428995210 | -457.6106862160 | -456.8459775720 | -457.7007564287 |
| 6.70 | -457.5231887553 | -456.8428994510 | -457.6106850639 | -456.8459775440 | -457.7007552175 |
| 6.80 | -457.5231877498 | -456.8428993880 | -457.6106840341 | -456.8459775200 | -457.7007541403 |
| 6.90 | -457.5231868539 | -456.8428993320 | -457.6106831113 | -456.8459774990 | -457.7007531695 |
| 7.00 | -457.5231860535 | -456.8428992820 | -457.6106822838 | -456.8459774800 | -457.7007522961 |
| 7.10 | -457.5231853290 | -456.8428992380 | -457.6106815407 | -456.8459774640 | -457.7007515178 |
| 7.20 | -457.5231846764 | -456.8428992000 | -457.6106808711 | -456.8459774500 | -457.7007508169 |
| 7.30 | -457.5231840875 | -456.8428991670 | -457.6106802674 | -456.8459774380 | -457.7007501858 |
| 7.40 | -457.5231835555 | -456.8428991380 | -457.6106797220 | -456.8459774270 | -457.7007496164 |
| 7.50 | -457.5231830739 | -456.8428991140 | -457.6106792283 | -456.8459774170 | -457.7007491019 |
| 7.60 | -457.5231826374 | -456.8428990940 | -457.6106787820 | -456.8459774080 | -457.7007486393 |
| 7.70 | -457.5231822412 | -456.8428990770 | -457.6106783766 | -456.8459773990 | -457.7007482196 |
| 7.80 | -457.5231818811 | -456.8428990630 | -457.6106780082 | -456.8459773910 | -457.7007478394 |
| 7.90 | -457.5231815533 | -456.8428990510 | -457.6106776731 | -456.8459773840 | -457.7007474937 |
| 8.00 | -457.5231812545 | -456.8428990420 | -457.6106773672 | -456.8459773770 | -457.7007471792 |
| 8.10 | -457.5231809820 | -456.8428990340 | -457.6106770893 | -456.8459773700 | -457.7007468951 |
| 8.20 | -457.5231807328 | -456.8428990280 | -457.6106768348 | -456.8459773640 | -457.7007466350 |
| 8.30 | -457.5231805050 | -456.8428990240 | -457.6106766021 | -456.8459773580 | -457.7007463984 |
| 8.40 | -457.5231802963 | -456.8428990200 | -457.6106763890 | -456.8459773530 | -457.7007461813 |
| 8.50 | -457.5231801050 | -456.8428990170 | -457.6106761932 | -456.8459773480 | -457.7007459818 |
| 8.60 | -457.5231799294 | -456.8428990150 | -457.6106760146 | -456.8459773440 | -457.7007458012 |
| 8.70 | -457.5231797680 | -456.8428990130 | -457.6106758498 | -456.8459773400 | -457.7007456340 |
| 8.80 | -457.5231796196 | -456.8428990120 | -457.6106756984 | -456.8459773360 | -457.7007454811 |
| 8.90 | -457.5231794829 | -456.8428990110 | -457.6106755590 | -456.8459773330 | -457.7007453399 |
| 9.00 | -457.5231793569 | -456.8428990100 | -457.6106754305 | -456.8459773310 | -457.7007452094 |
| 9.10 | -457.5231792407 | -456.8428990100 | -457.6106753121 | -456.8459773290 | -457.7007450896 |
| 9.20 | -457.5231791333 | -456.8428990090 | -457.6106752025 | -456.8459773270 | -457.7007449783 |
| 9.30 | -457.5231790341 | -456.8428990090 | -457.6106751014 | -456.8459773250 | -457.7007448764 |
| 9.40 | -457.5231789423 | -456.8428990090 | -457.6106750078 | -456.8459773240 | -457.7007447815 |
| 9.50 | -457.5231788573 | -456.8428990090 | -457.6106749206 | -456.8459773230 | -457.7007446925 |
| 9.60 | -457.5231787785 | -456.8428990090 | -457.6106748410 | -456.8459773220 | -457.7007446126 |
| 9.70 | -457.5231787054 | -456.8428990090 | -457.6106747664 | -456.8459773210 | -457.7007445371 |

|       |                 |                 |                 |                 |                 |
|-------|-----------------|-----------------|-----------------|-----------------|-----------------|
| 9.80  | -457.5231786376 | -456.8428990080 | -457.6106746973 | -456.8459773200 | -457.7007444667 |
| 9.90  | -457.5231785746 | -456.8428990080 | -457.6106746325 | -456.8459773200 | -457.7007444000 |
| 10.00 | -457.5231785159 | -456.8428990080 | -457.6106745728 | -456.8459773200 | -457.7007443393 |
| 10.10 | -457.5231784615 | -456.8428990080 | -457.6106745180 | -456.8459773190 | -457.7007442846 |
| 10.20 | -457.5231784106 | -456.8428990080 | -457.6106744662 | -456.8459773190 | -457.7007442318 |
| 10.30 | -457.5231783633 | -456.8428990080 | -457.6106744180 | -456.8459773190 | -457.7007441828 |
| 10.40 | -457.5231783191 | -456.8428990080 | -457.6106743731 | -456.8459773190 | -457.7007441370 |
| 10.50 | -457.5231782779 | -456.8428990080 | -457.6106743306 | -456.8459773190 | -457.7007440932 |
| 10.60 | -457.5231782394 | -456.8428990080 | -457.6106742922 | -456.8459773190 | -457.7007440548 |
| 10.70 | -457.5231782034 | -456.8428990080 | -457.6106742555 | -456.8459773190 | -457.7007440173 |
| 10.80 | -457.5231781698 | -456.8428990080 | -457.6106742213 | -456.8459773180 | -457.7007439831 |
| 10.90 | -457.5231781383 | -456.8428990080 | -457.6106741893 | -456.8459773180 | -457.7007439506 |
| 11.00 | -457.5231781088 | -456.8428990080 | -457.6106741593 | -456.8459773180 | -457.7007439201 |
| 11.10 | -457.5231780813 | -456.8428990080 | -457.6106741314 | -456.8459773180 | -457.7007438918 |
| 11.20 | -457.5231780553 | -456.8428990080 | -457.6106741049 | -456.8459773180 | -457.7007438648 |
| 11.30 | -457.5231780310 | -456.8428990080 | -457.6106740803 | -456.8459773180 | -457.7007438398 |
| 11.40 | -457.5231780082 | -456.8428990080 | -457.6106740571 | -456.8459773180 | -457.7007438162 |

Table S11: Ne-Rn electronic energies (in Hartree) calculated at CCSD(T)/aug-cc-pV4Z (CCSD(T)-4Z), CCSD(T)/aug-cc-pV5Z (CCSD(T)-5Z), and CCSD(T)/CBS levels.

| R(Å) | CCSD(T)-4Z      | SCF-4Z          | CCSD(T)-5Z      | SCF-5Z          | CBS             |
|------|-----------------|-----------------|-----------------|-----------------|-----------------|
| 3.00 | -416.7909853672 | -416.0808831110 | -416.8983245210 | -416.0839200620 | -417.0092365106 |
| 3.10 | -416.7924090770 | -416.0826858200 | -416.8996976785 | -416.0857239950 | -417.0105559420 |
| 3.20 | -416.7933902394 | -416.0839831620 | -416.9006392740 | -416.0870245370 | -417.0114542268 |
| 3.30 | -416.7940585163 | -416.0849150610 | -416.9012769092 | -416.0879609190 | -417.0120571950 |
| 3.40 | -416.7945069848 | -416.0855832950 | -416.9017019679 | -416.0886343100 | -417.0124547953 |
| 3.50 | -416.7948021988 | -416.0860617690 | -416.9019794255 | -416.0891180580 | -417.0127106605 |
| 3.60 | -416.7949914885 | -416.0864040460 | -416.9021553525 | -416.0894652250 | -417.0128698204 |
| 3.70 | -416.7951083245 | -416.0866488220 | -416.9022621523 | -416.0897141200 | -417.0129637764 |
| 3.80 | -416.7951762379 | -416.0868239260 | -416.9023224951 | -416.0898923650 | -417.0130144118 |
| 3.90 | -416.7952116728 | -416.0869492600 | -416.9023621206 | -416.0900198630 | -417.0130572182 |
| 3.91 | -416.7952139036 | -416.0869596410 | -416.9023538558 | -416.0900304130 | -417.0130378466 |
| 3.92 | -416.7952159324 | -416.0869696820 | -416.9023553994 | -416.0900406130 | -417.0130387918 |
| 3.93 | -416.7952177720 | -416.0869793920 | -416.9023567596 | -416.0900504760 | -417.0130395631 |
| 3.94 | -416.7952194300 | -416.0869887830 | -416.9023579501 | -416.0900600130 | -417.0130401810 |
| 3.95 | -416.7952209142 | -416.0869978660 | -416.9023589774 | -416.0900692340 | -417.0130406515 |
| 3.96 | -416.795222328  | -416.0870066500 | -416.9023598494 | -416.0900781490 | -417.0130409813 |
| 3.97 | -416.7952233931 | -416.0870151450 | -416.9023605730 | -416.0900867690 | -417.0130411766 |
| 3.98 | -416.7952244023 | -416.0870233610 | -416.9023611557 | -416.0900951030 | -417.0130412454 |
| 3.99 | -416.7952252619 | -416.0870313060 | -416.9023616034 | -416.0901031610 | -417.0130411976 |
| 4.00 | -416.7952259947 | -416.0870389890 | -416.9023619232 | -416.0901109510 | -417.0130410240 |
| 4.01 | -416.7952265861 | -416.0870464200 | -416.9023621207 | -416.0901184830 | -417.0130407514 |
| 4.02 | -416.7952270566 | -416.0870536060 | -416.9023622016 | -416.0901257650 | -417.0130403696 |
| 4.03 | -416.7952274092 | -416.0870605550 | -416.9023621721 | -416.0901328050 | -417.0130398882 |
| 4.04 | -416.7952276491 | -416.0870672750 | -416.9023620369 | -416.0901396110 | -417.0130393111 |
| 4.05 | -416.7952277813 | -416.0870737730 | -416.9023618019 | -416.0901461920 | -417.0130386441 |
| 4.06 | -416.7952278113 | -416.0870800560 | -416.9023614720 | -416.0901525530 | -417.0130378929 |
| 4.07 | -416.7952277440 | -416.0870861320 | -416.9023610524 | -416.0901587030 | -417.0130370621 |
| 4.08 | -416.7952275842 | -416.0870920060 | -416.9023605473 | -416.0901646480 | -417.0130361546 |
| 4.09 | -416.7952273369 | -416.0870976860 | -416.9023599608 | -416.0901703960 | -417.0130351742 |
| 4.10 | -416.7949914885 | -416.0871031780 | -416.9023592975 | -416.0901759520 | -417.0132812265 |
| 4.20 | -416.7948021988 | -416.0871489900 | -416.9023492857 | -416.0902222840 | -417.0134590175 |
| 4.30 | -416.7945069848 | -416.0871815510 | -416.9023352520 | -416.0902552720 | -417.0137397526 |

|      |                 |                 |                 |                 |                 |
|------|-----------------|-----------------|-----------------|-----------------|-----------------|
| 4.40 | -416.7940585163 | -416.0872045620 | -416.9023193803 | -416.0902787300 | -417.0141775020 |
| 4.50 | -416.7933902394 | -416.0872207070 | -416.9023030731 | -416.0902953930 | -417.0148449374 |
| 4.60 | -416.7924090770 | -416.0872319430 | -416.9022871996 | -416.0903072170 | -417.0158414957 |
| 4.70 | -416.7909853672 | -416.0872396950 | -416.9022722494 | -416.0903156040 | -417.0173042317 |
| 4.80 | -416.7951399669 | -416.0872449900 | -416.9022584879 | -416.0903215530 | -417.0129167401 |
| 4.90 | -416.7951284803 | -416.0872485660 | -416.9022460090 | -416.0903257750 | -417.0129028572 |
| 5.00 | -416.7951181255 | -416.0872509460 | -416.9022348091 | -416.0903287690 | -417.0128904258 |
| 5.10 | -416.7951088529 | -416.0872524990 | -416.9022248470 | -416.0903308900 | -417.0128794211 |
| 5.20 | -416.7951006016 | -416.0872534810 | -416.9022160218 | -416.0903323840 | -417.0128697063 |
| 5.30 | -416.7950932873 | -416.0872540730 | -416.9022082365 | -416.0903334270 | -417.0128611733 |
| 5.40 | -416.7950868200 | -416.0872543990 | -416.9022014002 | -416.0903341470 | -417.0128537286 |
| 5.50 | -416.7950811110 | -416.0872545500 | -416.9021953720 | -416.0903346350 | -417.0128471761 |
| 5.60 | -416.7950760724 | -416.0872545850 | -416.9021900720 | -416.0903349580 | -417.0128414401 |
| 5.70 | -416.7950716296 | -416.0872545490 | -416.9021854116 | -416.0903351650 | -417.0128364150 |
| 5.80 | -416.7950677096 | -416.0872544720 | -416.9021813102 | -416.0903352920 | -417.0128320086 |
| 5.90 | -416.7950642485 | -416.0872543730 | -416.9021776974 | -416.0903353640 | -417.0128281405 |
| 6.00 | -416.7950584844 | -416.0872541600 | -416.9021745109 | -416.0903353990 | -417.0128275191 |
| 6.10 | -416.7950560850 | -416.0872540580 | -416.9021716964 | -416.0903354100 | -417.0128242054 |
| 6.20 | -416.7950539574 | -416.0872539620 | -416.9021692066 | -416.0903354040 | -417.0128212851 |
| 6.30 | -416.7950520666 | -416.0872538740 | -416.9021670003 | -416.0903353870 | -417.0128187080 |
| 6.40 | -416.7950503832 | -416.0872537930 | -416.9021650421 | -416.0903353640 | -417.0128164288 |
| 6.50 | -416.7950488821 | -416.0872537190 | -416.9021633010 | -416.0903353370 | -417.0128144095 |
| 6.60 | -416.7950397338 | -416.0872536510 | -416.9021617500 | -416.0903353080 | -417.0128208076 |
| 6.70 | -416.7950475413 | -416.0872535890 | -416.9021603661 | -416.0903352800 | -417.0128097612 |
| 6.80 | -416.7950463415 | -416.0872535320 | -416.9021591290 | -416.0903352530 | -417.0128084681 |
| 6.90 | -416.7950452662 | -416.0872534800 | -416.9021580212 | -416.0903352280 | -417.0128073109 |
| 7.00 | -416.7950443008 | -416.0872534330 | -416.9021570274 | -416.0903352050 | -417.0128062740 |
| 7.10 | -416.7950434327 | -416.0872533900 | -416.9021561345 | -416.0903351840 | -417.0128053425 |
| 7.20 | -416.7950426507 | -416.0872533520 | -416.9021553308 | -416.0903351650 | -417.0128045055 |
| 7.30 | -416.7950419453 | -416.0872533170 | -416.9021546064 | -416.0903351490 | -417.0128037505 |
| 7.40 | -416.7950413079 | -416.0872532860 | -416.9021539522 | -416.0903351340 | -417.0128030697 |
| 7.50 | -416.7950407311 | -416.0872532590 | -416.9021533606 | -416.0903351210 | -417.0128024547 |
| 7.60 | -416.7950402083 | -416.0872532360 | -416.9021528248 | -416.0903351090 | -417.0128018991 |
| 7.70 | -416.7950393027 | -416.0872532160 | -416.9021523388 | -416.0903350990 | -417.0128018477 |
| 7.80 | -416.7950389102 | -416.0872531980 | -416.9021518974 | -416.0903350890 | -417.0128013504 |
| 7.90 | -416.7950385527 | -416.0872531830 | -416.9021514958 | -416.0903350800 | -417.0128008994 |
| 8.00 | -416.7950382264 | -416.0872531710 | -416.9021511302 | -416.0903350720 | -417.0128004901 |
| 8.10 | -416.7950382271 | -416.0872531710 | -416.9021507966 | -416.0903350640 | -417.0127998105 |
| 8.20 | -416.7950379283 | -416.0872531600 | -416.9021504921 | -416.0903350580 | -417.0127994971 |
| 8.30 | -416.7950376558 | -416.0872531520 | -416.9021502137 | -416.0903350510 | -417.0127992118 |
| 8.40 | -416.7950374061 | -416.0872531440 | -416.9021499588 | -416.0903350460 | -417.0127989498 |
| 8.50 | -416.7950371772 | -416.0872531390 | -416.9021497252 | -416.0903350410 | -417.0127987113 |
| 8.60 | -416.7950369672 | -416.0872531340 | -416.9021495109 | -416.0903350360 | -417.0127984925 |
| 8.70 | -416.7950367743 | -416.0872531300 | -416.9021493141 | -416.0903350320 | -417.0127982916 |
| 8.80 | -416.7950365968 | -416.0872531270 | -416.9021491331 | -416.0903350280 | -417.0127981075 |
| 8.90 | -416.7950364334 | -416.0872531250 | -416.9021489665 | -416.0903350250 | -417.0127979381 |
| 9.00 | -416.7950362828 | -416.0872531230 | -416.9021488130 | -416.0903350230 | -417.0127977816 |
| 9.10 | -416.7950361444 | -416.0872531210 | -416.9021486714 | -416.0903350200 | -417.0127976372 |
| 9.20 | -416.7950360157 | -416.0872531200 | -416.9021485407 | -416.0903350180 | -417.0127975050 |
| 9.30 | -416.7950358971 | -416.0872531190 | -416.9021484200 | -416.0903350160 | -417.0127973827 |
| 9.40 | -416.7950357874 | -416.0872531190 | -416.9021483083 | -416.0903350150 | -417.0127972694 |
| 9.50 | -416.7950356859 | -416.0872531180 | -416.9021482049 | -416.0903350140 | -417.0127971640 |
| 9.60 | -416.7950355917 | -416.0872531180 | -416.9021481091 | -416.0903350130 | -417.0127970670 |
| 9.70 | -416.7950355044 | -416.0872531170 | -416.9021480203 | -416.0903350120 | -417.0127969766 |



|       |                 |                 |                 |                 |                 |
|-------|-----------------|-----------------|-----------------|-----------------|-----------------|
| 9.80  | -416.7950354234 | -416.0872531170 | -416.9021479378 | -416.0903350110 | -417.0127968932 |
| 9.90  | -416.7950353482 | -416.0872531170 | -416.9021478613 | -416.0903350100 | -417.0127968158 |
| 10.00 | -416.7950352782 | -416.0872531170 | -416.9021477900 | -416.0903350100 | -417.0127967433 |
| 10.10 | -416.7950352131 | -416.0872531170 | -416.9021477238 | -416.0903350090 | -417.0127966765 |
| 10.20 | -416.7950351524 | -416.0872531170 | -416.9021476622 | -416.0903350090 | -417.0127966138 |
| 10.30 | -416.7950350959 | -416.0872531170 | -416.9021476047 | -416.0903350090 | -417.0127965553 |
| 10.40 | -416.7950350432 | -416.0872531170 | -416.9021475511 | -416.0903350090 | -417.0127965008 |
| 10.50 | -416.7950349940 | -416.0872531170 | -416.9021475011 | -416.0903350080 | -417.0127964505 |
| 10.60 | -416.7950349481 | -416.0872531170 | -416.9021474545 | -416.0903350080 | -417.0127964031 |
| 10.70 | -416.7950349051 | -416.0872531170 | -416.9021474108 | -416.0903350080 | -417.0127963587 |
| 10.80 | -416.7950348650 | -416.0872531170 | -416.9021473701 | -416.0903350080 | -417.0127963173 |
| 10.90 | -416.7950348275 | -416.0872531170 | -416.9021473319 | -416.0903350080 | -417.0127962785 |
| 11.00 | -416.7950347923 | -416.0872531170 | -416.9021472962 | -416.0903350080 | -417.0127962422 |
| 11.10 | -416.7950347593 | -416.0872531170 | -416.9021472631 | -416.0903350080 | -417.0127962091 |
| 11.20 | -416.7950347284 | -416.0872531170 | -416.9021472312 | -416.0903350080 | -417.0127961761 |
| 11.30 | -416.7950346995 | -416.0872531170 | -416.9021472020 | -416.0903350080 | -417.0127961466 |
| 11.40 | -416.7950346723 | -416.0872531170 | -416.9021471743 | -416.0903350080 | -417.0127961184 |
| 11.50 | -416.7950346467 | -416.0872531170 | -416.9021471484 | -416.0903350080 | -417.0127960921 |
| 11.60 | -416.7950346227 | -416.0872531170 | -416.9021471240 | -416.0903350080 | -417.0127960673 |
| 11.70 | -416.7950346001 | -416.0872531170 | -416.9021471011 | -416.0903350080 | -417.0127960441 |
| 11.80 | -416.7950345789 | -416.0872531170 | -416.9021470795 | -416.0903350080 | -417.0127960222 |
| 11.90 | -416.7950345589 | -416.0872531170 | -416.9021470593 | -416.0903350080 | -417.0127960016 |
| 12.00 | -416.7950345401 | -416.0872531170 | -416.9021470402 | -416.0903350080 | -417.0127959822 |

Table S12: Ar<sub>2</sub> electronic energies (in Hartree) calculated at CCSD(T)/aug-cc-pV4Z (CCSD(T)-4Z), CCSD(T)/aug-cc-pV5Z (CCSD(T)-5Z), and CCSD(T)/CBS levels.

| R(Å) | CCSD(T)-4Z      | SCF-4Z          | CCSD(T)-5Z      | SCF-5Z          | CBS             |
|------|-----------------|-----------------|-----------------|-----------------|-----------------|
| 2.00 | -1053.980408483 | -1053.442113870 | -1053.999982665 | -1053.444229560 | -1054.019332124 |
| 2.10 | -1054.029239909 | -1053.494882940 | -1054.048024348 | -1053.496596290 | -1054.066769255 |
| 2.20 | -1054.064749473 | -1053.533585410 | -1054.082974630 | -1053.535049110 | -1054.101275064 |
| 2.30 | -1054.090350425 | -1053.561785340 | -1054.108177433 | -1053.563095580 | -1054.126144654 |
| 2.40 | -1054.108663420 | -1053.582221010 | -1054.126206277 | -1053.583438130 | -1054.143928001 |
| 2.50 | -1054.121665598 | -1053.596961840 | -1054.139005275 | -1053.598123170 | -1054.156544310 |
| 2.60 | -1054.130828373 | -1053.607552310 | -1054.148022387 | -1053.608680480 | -1054.165427808 |
| 2.70 | -1054.137235205 | -1053.615134000 | -1054.154324348 | -1053.616242420 | -1054.171630740 |
| 2.80 | -1054.141677027 | -1053.620544230 | -1054.158690284 | -1053.621640700 | -1054.175923715 |
| 2.90 | -1054.144727153 | -1053.624393410 | -1054.161685150 | -1053.625482460 | -1054.178865179 |
| 3.00 | -1054.146798454 | -1053.627124260 | -1054.163715923 | -1053.628208650 | -1054.180856830 |
| 3.10 | -1054.148186423 | -1053.629056510 | -1054.165073846 | -1053.630138060 | -1054.182184634 |
| 3.20 | -1054.149101274 | -1053.630420190 | -1054.165966006 | -1053.631500220 | -1054.183053673 |
| 3.30 | -1054.149691492 | -1053.631380270 | -1054.166538675 | -1053.632459680 | -1054.183609185 |
| 3.40 | -1054.150061280 | -1053.632054740 | -1054.166894481 | -1053.633134000 | -1054.183948531 |
| 3.50 | -1054.150283203 | -1053.632527670 | -1054.167104956 | -1053.633606920 | -1054.184147996 |
| 3.60 | -1054.150407360 | -1053.632858760 | -1054.167219524 | -1053.633937910 | -1054.184253610 |
| 3.70 | -1054.150468086 | -1053.633090210 | -1054.167272078 | -1053.634169120 | -1054.184296302 |
| 3.71 | -1054.150471640 | -1053.633109110 | -1054.167274886 | -1053.634187990 | -1054.184298269 |
| 3.72 | -1054.150474810 | -1053.633127340 | -1054.167277318 | -1053.634206190 | -1054.184299237 |
| 3.73 | -1054.150477633 | -1053.633144920 | -1054.167279410 | -1053.634223740 | -1054.184300205 |
| 3.74 | -1054.150480098 | -1053.633161880 | -1054.167281169 | -1053.634240670 | -1054.184302222 |
| 3.75 | -1054.150482244 | -1053.633178240 | -1054.167282629 | -1053.634257000 | -1054.184304238 |
| 3.76 | -1054.150484079 | -1053.633194030 | -1054.167283773 | -1053.634272750 | -1054.184304212 |
| 3.77 | -1054.150485618 | -1053.633209250 | -1054.167284631 | -1053.634287940 | -1054.184304179 |
| 3.78 | -1054.150486876 | -1053.633223930 | -1054.167285218 | -1053.634302590 | -1054.184303147 |

|      |                 |                 |                 |                 |                 |
|------|-----------------|-----------------|-----------------|-----------------|-----------------|
| 3.79 | -1054.150487866 | -1053.633238090 | -1054.167285547 | -1053.634316720 | -1054.184304164 |
| 3.80 | -1054.150488601 | -1053.633251750 | -1054.167285632 | -1053.634330350 | -1054.184303132 |
| 3.81 | -1054.150489094 | -1053.633264920 | -1054.167285485 | -1053.634343490 | -1054.184301099 |
| 3.82 | -1054.150489358 | -1053.633277620 | -1054.167285118 | -1053.634356170 | -1054.184301111 |
| 3.83 | -1054.150489404 | -1053.633289870 | -1054.167284545 | -1053.634368390 | -1054.184301127 |
| 3.84 | -1054.150489243 | -1053.633301680 | -1054.167283775 | -1053.634380180 | -1054.184299089 |
| 3.85 | -1054.150488886 | -1053.633313080 | -1054.167282818 | -1053.634391550 | -1054.184297057 |
| 3.86 | -1054.150488344 | -1053.633324060 | -1054.167281684 | -1053.634402510 | -1054.184296068 |
| 3.87 | -1054.150487627 | -1053.633334650 | -1054.167280384 | -1053.634413090 | -1054.184291976 |
| 3.88 | -1054.150486743 | -1053.633344870 | -1054.167278928 | -1053.634423280 | -1054.184290992 |
| 3.89 | -1054.150485702 | -1053.633354710 | -1054.167277324 | -1053.634433110 | -1054.184287949 |
| 3.90 | -1054.150484516 | -1053.633364210 | -1054.167275576 | -1053.634442600 | -1054.184286955 |
| 4.00 | -1054.150466145 | -1053.633442250 | -1054.167252141 | -1053.634520630 | -1054.184257714 |
| 4.10 | -1054.150440212 | -1053.633496150 | -1054.167221945 | -1053.634574820 | -1054.184223355 |
| 4.20 | -1054.150411045 | -1053.633533200 | -1054.167189197 | -1053.634612410 | -1054.184185855 |
| 4.30 | -1054.150381286 | -1053.633558510 | -1054.167156476 | -1053.634638440 | -1054.184149302 |
| 4.40 | -1054.150352526 | -1053.633575730 | -1054.167125280 | -1053.634656420 | -1054.184114728 |
| 4.50 | -1054.150325653 | -1053.633587420 | -1054.167096411 | -1053.634668790 | -1054.184083248 |
| 4.60 | -1054.150301083 | -1053.633595340 | -1054.167070216 | -1053.634677250 | -1054.184055895 |
| 4.70 | -1054.150278975 | -1053.633600730 | -1054.167046774 | -1053.634683000 | -1054.184031644 |
| 4.80 | -1054.150259268 | -1053.633604400 | -1054.167025986 | -1053.634686870 | -1054.184009482 |
| 4.90 | -1054.150241838 | -1053.633606920 | -1054.167007673 | -1053.634689450 | -1054.183990399 |
| 5.00 | -1054.150226499 | -1053.633608650 | -1054.166991610 | -1053.634691170 | -1054.183974405 |
| 5.10 | -1054.150213043 | -1053.633609830 | -1054.166977559 | -1053.634692310 | -1054.183959378 |
| 5.20 | -1054.150201263 | -1053.633610620 | -1054.166965287 | -1053.634693090 | -1054.183945335 |
| 5.30 | -1054.150190960 | -1053.633611120 | -1054.166954576 | -1053.634693630 | -1054.183935312 |
| 5.40 | -1054.150181949 | -1053.633611420 | -1054.166945241 | -1053.634694010 | -1054.183924218 |
| 5.50 | -1054.150174066 | -1053.633611570 | -1054.166937075 | -1053.634694280 | -1054.183916151 |
| 5.60 | -1054.150167161 | -1053.633611610 | -1054.166929924 | -1053.634694470 | -1054.183909066 |
| 5.70 | -1054.150161106 | -1053.633611570 | -1054.166923675 | -1053.634694590 | -1054.183902976 |
| 5.80 | -1054.150155789 | -1053.633611480 | -1054.166918207 | -1053.634694670 | -1054.183895832 |
| 5.90 | -1054.150151110 | -1053.633611360 | -1054.166913394 | -1053.634694710 | -1054.183890742 |
| 6.00 | -1054.150146985 | -1053.633611220 | -1054.166909157 | -1053.634694720 | -1054.183886658 |
| 6.10 | -1054.150143342 | -1053.633611080 | -1054.166905411 | -1053.634694710 | -1054.183882585 |
| 6.20 | -1054.150140119 | -1053.633610930 | -1054.166902109 | -1053.634694680 | -1054.183879517 |
| 6.30 | -1054.150137261 | -1053.633610790 | -1054.166899195 | -1053.634694650 | -1054.183876455 |
| 6.40 | -1054.150134722 | -1053.633610660 | -1054.166896592 | -1053.634694610 | -1054.183874405 |
| 6.50 | -1054.150132461 | -1053.633610540 | -1054.166894286 | -1053.634694560 | -1054.183871365 |
| 6.60 | -1054.150130445 | -1053.633610420 | -1054.166892231 | -1053.634694520 | -1054.183869320 |
| 6.70 | -1054.150128645 | -1053.633610320 | -1054.166890389 | -1053.634694480 | -1054.183866238 |
| 6.80 | -1054.150127032 | -1053.633610230 | -1054.166888756 | -1053.634694440 | -1054.183866259 |
| 6.90 | -1054.150125586 | -1053.633610140 | -1054.166887285 | -1053.634694410 | -1054.183863176 |
| 7.00 | -1054.150124292 | -1053.633610070 | -1054.166885966 | -1053.634694380 | -1054.183863202 |
| 7.10 | -1054.150123119 | -1053.633610000 | -1054.166884779 | -1053.634694350 | -1054.183862180 |
| 7.20 | -1054.150122064 | -1053.633609950 | -1054.166883710 | -1053.634694320 | -1054.183861169 |
| 7.30 | -1054.150121115 | -1053.633609900 | -1054.166882745 | -1053.634694300 | -1054.183860152 |
| 7.40 | -1054.150120255 | -1053.633609850 | -1054.166881874 | -1053.634694270 | -1054.183859141 |
| 7.50 | -1054.150119476 | -1053.633609810 | -1054.166881085 | -1053.634694250 | -1054.183858129 |
| 7.60 | -1054.150118770 | -1053.633609780 | -1054.166880370 | -1053.634694230 | -1054.183856075 |
| 7.70 | -1054.150118129 | -1053.633609760 | -1054.166879721 | -1053.634694210 | -1054.183857124 |
| 7.80 | -1054.150117546 | -1053.633609730 | -1054.166879131 | -1053.634694200 | -1054.183855063 |
| 7.90 | -1054.150117015 | -1053.633609710 | -1054.166878594 | -1053.634694180 | -1054.183856113 |
| 8.00 | -1054.150116531 | -1053.633609700 | -1054.166878104 | -1053.634694170 | -1054.183854063 |
| 8.10 | -1054.150116089 | -1053.633609690 | -1054.166877658 | -1053.634694160 | -1054.183855113 |

|       |                 |                 |                 |                 |                 |
|-------|-----------------|-----------------|-----------------|-----------------|-----------------|
| 8.20  | -1054.150115686 | -1053.633609680 | -1054.166877251 | -1053.634694150 | -1054.183853063 |
| 8.30  | -1054.150115316 | -1053.633609670 | -1054.166876876 | -1053.634694140 | -1054.183854113 |
| 8.40  | -1054.150114977 | -1053.633609660 | -1054.166876534 | -1053.634694130 | -1054.183854113 |
| 8.50  | -1054.150114667 | -1053.633609660 | -1054.166876221 | -1053.634694130 | -1054.183852063 |
| 8.60  | -1054.150114381 | -1053.633609660 | -1054.166875933 | -1053.634694120 | -1054.183853118 |
| 8.70  | -1054.150114119 | -1053.633609650 | -1054.166875669 | -1053.634694120 | -1054.183853113 |
| 8.80  | -1054.150113878 | -1053.633609650 | -1054.166875425 | -1053.634694120 | -1054.183851063 |
| 8.90  | -1054.150113656 | -1053.633609650 | -1054.166875201 | -1053.634694110 | -1054.183851069 |
| 9.00  | -1054.150113451 | -1053.633609650 | -1054.166874995 | -1053.634694110 | -1054.183852118 |
| 9.10  | -1054.150113262 | -1053.633609650 | -1054.166874804 | -1053.634694110 | -1054.183852118 |
| 9.20  | -1054.150113087 | -1053.633609650 | -1054.166874628 | -1053.634694110 | -1054.183852118 |
| 9.30  | -1054.150112925 | -1053.633609650 | -1054.166874466 | -1053.634694110 | -1054.183850069 |
| 9.40  | -1054.150112776 | -1053.633609650 | -1054.166874315 | -1053.634694110 | -1054.183850069 |
| 9.50  | -1054.150112638 | -1053.633609650 | -1054.166874176 | -1053.634694110 | -1054.183850069 |
| 9.60  | -1054.150112509 | -1053.633609650 | -1054.166874047 | -1053.634694110 | -1054.183850069 |
| 9.70  | -1054.150112390 | -1053.633609650 | -1054.166873927 | -1053.634694110 | -1054.183851118 |
| 9.80  | -1054.150112279 | -1053.633609650 | -1054.166873816 | -1053.634694110 | -1054.183851118 |
| 9.90  | -1054.150112177 | -1053.633609650 | -1054.166873712 | -1053.634694110 | -1054.183851118 |
| 10.00 | -1054.150112081 | -1053.633609650 | -1054.166873616 | -1053.634694100 | -1054.183851124 |
| 10.10 | -1054.150111992 | -1053.633609650 | -1054.166873527 | -1053.634694100 | -1054.183851124 |
| 10.20 | -1054.150111909 | -1053.633609650 | -1054.166873443 | -1053.634694100 | -1054.183849075 |
| 10.30 | -1054.150111832 | -1053.633609650 | -1054.166873366 | -1053.634694100 | -1054.183849075 |
| 10.40 | -1054.150111760 | -1053.633609650 | -1054.166873293 | -1053.634694100 | -1054.183849075 |
| 10.50 | -1054.150111693 | -1053.633609640 | -1054.166873226 | -1053.634694100 | -1054.183849069 |
| 10.60 | -1054.150111630 | -1053.633609640 | -1054.166873163 | -1053.634694100 | -1054.183849069 |
| 10.70 | -1054.150111571 | -1053.633609650 | -1054.166873104 | -1053.634694100 | -1054.183849075 |
| 10.80 | -1054.150111516 | -1053.633609640 | -1054.166873049 | -1053.634694100 | -1054.183849069 |
| 10.90 | -1054.150111465 | -1053.633609640 | -1054.166872997 | -1053.634694100 | -1054.183850118 |
| 11.00 | -1054.150111416 | -1053.633609640 | -1054.166872949 | -1053.634694100 | -1054.183850118 |
| 11.10 | -1054.150111371 | -1053.633609640 | -1054.166872903 | -1053.634694100 | -1054.183850118 |
| 11.20 | -1054.150111329 | -1053.633609640 | -1054.166872861 | -1053.634694100 | -1054.183850118 |
| 11.30 | -1054.150111289 | -1053.633609640 | -1054.166872821 | -1053.634694100 | -1054.183850118 |
| 11.40 | -1054.150111252 | -1053.633609640 | -1054.166872784 | -1053.634694100 | -1054.183850118 |
| 11.50 | -1054.150111217 | -1053.633609640 | -1054.166872748 | -1053.634694100 | -1054.183850118 |
| 11.60 | -1054.150111184 | -1053.633609640 | -1054.166872715 | -1053.634694100 | -1054.183850118 |
| 11.70 | -1054.150111153 | -1053.633609640 | -1054.166872684 | -1053.634694100 | -1054.183850118 |
| 11.80 | -1054.150111124 | -1053.633609640 | -1054.166872655 | -1053.634694100 | -1054.183850118 |
| 11.90 | -1054.150111097 | -1053.633609640 | -1054.166872628 | -1053.634694100 | -1054.183850118 |
| 12.00 | -1054.150111071 | -1053.633609640 | -1054.166872602 | -1053.634694100 | -1054.183850118 |

Table S13: Ar-Kr electronic energies (in Hartree) calculated at CCSD(T)/aug-cc-pV4Z (CCSD(T)-4Z), CCSD(T)/aug-cc-pV5Z (CCSD(T)-5Z), and CCSD(T)/CBS levels.

| R(Å) | CCSD(T)-4Z      | SCF-4Z          | CCSD(T)-5Z      | SCF-5Z          | CBS             |
|------|-----------------|-----------------|-----------------|-----------------|-----------------|
| 2.00 | -3279.223852976 | -3278.605343170 | -3279.321535328 | -3278.606938400 | -3279.423125540 |
| 2.10 | -3279.288616051 | -3278.674721300 | -3279.385499255 | -3278.676006030 | -3279.486425455 |
| 2.20 | -3279.336728815 | -3278.726703530 | -3279.433005003 | -3278.727785270 | -3279.533408372 |
| 2.30 | -3279.372196054 | -3278.765405670 | -3279.468007508 | -3278.766355340 | -3279.567997482 |
| 2.40 | -3279.398151156 | -3278.794060810 | -3279.493605212 | -3278.794925200 | -3279.593268120 |
| 2.50 | -3279.417013043 | -3278.815173910 | -3279.512191582 | -3278.815983800 | -3279.611596043 |
| 2.60 | -3279.430626307 | -3278.830662970 | -3279.525592166 | -3278.831438400 | -3279.624792844 |
| 2.70 | -3279.440382932 | -3278.841982190 | -3279.535184635 | -3278.842736010 | -3279.634225226 |
| 2.80 | -3279.447323870 | -3278.850225090 | -3279.541999230 | -3278.850965360 | -3279.640914877 |
| 2.90 | -3279.452221847 | -3278.856208340 | -3279.546800498 | -3278.856940090 | -3279.645619465 |

|      |                 |                 |                 |                 |                 |
|------|-----------------|-----------------|-----------------|-----------------|-----------------|
| 3.00 | -3279.455646732 | -3278.860538300 | -3279.550151907 | -3278.861264660 | -3279.648896813 |
| 3.10 | -3279.458016333 | -3278.863662930 | -3279.552466003 | -3278.864385860 | -3279.651154601 |
| 3.20 | -3279.459635300 | -3278.865911720 | -3279.554043198 | -3278.866632500 | -3279.652689178 |
| 3.30 | -3279.460724371 | -3278.867526060 | -3279.555100797 | -3278.868245520 | -3279.653714499 |
| 3.40 | -3279.461442617 | -3278.868682160 | -3279.555795181 | -3278.869400860 | -3279.654384275 |
| 3.50 | -3279.461903902 | -3278.869508230 | -3279.556238189 | -3278.870226490 | -3279.654808353 |
| 3.60 | -3279.462189158 | -3278.870097240 | -3279.556509157 | -3278.870815220 | -3279.655064488 |
| 3.70 | -3279.462355530 | -3278.870516410 | -3279.556664099 | -3278.871234170 | -3279.655207562 |
| 3.80 | -3279.462442930 | -3278.870814170 | -3279.556742137 | -3278.871531730 | -3279.655275889 |
| 3.90 | -3279.462479039 | -3278.871025300 | -3279.556770419 | -3278.871742680 | -3279.655296061 |
| 3.91 | -3279.462480626 | -3278.871271260 | -3279.556771284 | -3278.871760040 | -3279.655409792 |
| 3.92 | -3279.462481902 | -3278.871261970 | -3279.556771858 | -3278.871776810 | -3279.655394853 |
| 3.93 | -3279.462482890 | -3278.871252350 | -3279.556772156 | -3278.871793020 | -3279.655379785 |
| 3.94 | -3279.462483603 | -3278.871242390 | -3279.556772188 | -3278.871808670 | -3279.655364580 |
| 3.95 | -3279.462484054 | -3278.871232070 | -3279.556771971 | -3278.871823780 | -3279.655349223 |
| 3.96 | -3279.462484257 | -3278.871221380 | -3279.556771517 | -3278.871838390 | -3279.655333726 |
| 3.97 | -3279.462484223 | -3278.871210320 | -3279.556770835 | -3278.871852490 | -3279.655318066 |
| 3.98 | -3279.462483965 | -3278.871198860 | -3279.556769939 | -3278.871866120 | -3279.655302257 |
| 3.99 | -3279.462483490 | -3278.871187000 | -3279.556768840 | -3278.871879280 | -3279.655286273 |
| 4.00 | -3279.462482817 | -3278.871174720 | -3279.556767547 | -3278.871891990 | -3279.655258899 |
| 4.10 | -3279.462467064 | -3278.871280230 | -3279.556746123 | -3278.871997500 | -3279.655222172 |
| 4.20 | -3279.462440346 | -3278.871354570 | -3279.556714553 | -3278.872071960 | -3279.655181436 |
| 4.30 | -3279.462408232 | -3278.871406800 | -3279.556678298 | -3278.872124430 | -3279.655140100 |
| 4.40 | -3279.462374287 | -3278.871443400 | -3279.556640834 | -3278.872161350 | -3279.655100308 |
| 4.50 | -3279.462340705 | -3278.871468980 | -3279.556604317 | -3278.872187280 | -3279.655070080 |
| 4.60 | -3279.462308773 | -3278.871499210 | -3279.556569915 | -3278.872205470 | -3279.655022237 |
| 4.70 | -3279.462279194 | -3278.871486810 | -3279.556538310 | -3278.872218190 | -3279.654998641 |
| 4.80 | -3279.462252252 | -3278.871507820 | -3279.556509676 | -3278.872227070 | -3279.654971447 |
| 4.90 | -3279.462228017 | -3278.871513780 | -3279.556484054 | -3278.872233240 | -3279.654947432 |
| 5.00 | -3279.462206404 | -3278.871517890 | -3279.556461313 | -3278.872237510 | -3279.654926310 |
| 5.10 | -3279.462187236 | -3278.871520730 | -3279.556441222 | -3278.872240460 | -3279.654907807 |
| 5.20 | -3279.462170327 | -3278.871522680 | -3279.556423554 | -3278.872242480 | -3279.654891611 |
| 5.30 | -3279.462155434 | -3278.871524010 | -3279.556408039 | -3278.872243860 | -3279.654877451 |
| 5.40 | -3279.462142344 | -3278.871524910 | -3279.556394438 | -3278.872244800 | -3279.654865068 |
| 5.50 | -3279.462130848 | -3278.871525510 | -3279.556382519 | -3278.872245440 | -3279.654854235 |
| 5.60 | -3279.462120747 | -3278.871525900 | -3279.556372078 | -3278.872245890 | -3279.654844720 |
| 5.70 | -3279.462111882 | -3278.871526130 | -3279.556362915 | -3278.872246190 | -3279.654836382 |
| 5.80 | -3279.462104083 | -3278.871526260 | -3279.556354878 | -3278.872246410 | -3279.654829067 |
| 5.90 | -3279.462097218 | -3278.871526320 | -3279.556347818 | -3278.872246560 | -3279.654822620 |
| 6.00 | -3279.462091166 | -3278.871526320 | -3279.556341601 | -3278.872246660 | -3279.654816934 |
| 6.10 | -3279.462085816 | -3278.871526280 | -3279.556336117 | -3278.872246730 | -3279.654811911 |
| 6.20 | -3279.462081096 | -3278.871526220 | -3279.556331276 | -3278.872246770 | -3279.654807467 |
| 6.30 | -3279.462076909 | -3278.871526140 | -3279.556326991 | -3278.872246790 | -3279.654803541 |
| 6.40 | -3279.462073186 | -3278.871526060 | -3279.556323191 | -3278.872246790 | -3279.654800051 |
| 6.50 | -3279.462069881 | -3278.871525970 | -3279.556319818 | -3278.872246780 | -3279.654796945 |
| 6.60 | -3279.462066933 | -3278.871525890 | -3279.556316812 | -3278.872246770 | -3279.654794181 |
| 6.70 | -3279.462064307 | -3278.871525810 | -3279.556314135 | -3278.872246750 | -3279.654791718 |
| 6.80 | -3279.462061956 | -3278.871525740 | -3279.556311740 | -3278.872246720 | -3279.654789512 |
| 6.90 | -3279.462059850 | -3278.871525670 | -3279.556309596 | -3278.872246690 | -3279.654787533 |
| 7.00 | -3279.462057959 | -3278.871525600 | -3279.556307676 | -3278.872246670 | -3279.654785770 |
| 7.10 | -3279.462056254 | -3278.871525550 | -3279.556305948 | -3278.872246640 | -3279.654784166 |
| 7.20 | -3279.462054729 | -3278.871525490 | -3279.556304396 | -3278.872246620 | -3279.654782737 |
| 7.30 | -3279.462053349 | -3278.871525450 | -3279.556302995 | -3278.872246590 | -3279.654781433 |
| 7.40 | -3279.462052104 | -3278.871525400 | -3279.556301729 | -3278.872246570 | -3279.654780265 |

|       |                 |                 |                 |                 |                 |
|-------|-----------------|-----------------|-----------------|-----------------|-----------------|
| 7.50  | -3279.462050975 | -3278.871525360 | -3279.556300587 | -3278.872246550 | -3279.654779211 |
| 7.60  | -3279.462049943 | -3278.871525320 | -3279.556299549 | -3278.872246530 | -3279.654778242 |
| 7.70  | -3279.462049024 | -3278.871525290 | -3279.556298611 | -3278.872246520 | -3279.654777372 |
| 7.80  | -3279.462048180 | -3278.871525260 | -3279.556297757 | -3278.872246500 | -3279.654776572 |
| 7.90  | -3279.462047413 | -3278.871525230 | -3279.556296980 | -3278.872246490 | -3279.654775860 |
| 8.00  | -3279.462046713 | -3278.871525210 | -3279.556296274 | -3278.872246470 | -3279.654775210 |
| 8.10  | -3279.462046065 | -3278.871525190 | -3279.556295628 | -3278.872246460 | -3279.654774602 |
| 8.20  | -3279.462045492 | -3278.871525170 | -3279.556295040 | -3278.872246450 | -3279.654774052 |
| 8.30  | -3279.462044958 | -3278.871525150 | -3279.556294501 | -3278.872246440 | -3279.654773552 |
| 8.40  | -3279.462044470 | -3278.871525140 | -3279.556294007 | -3278.872246430 | -3279.654773098 |
| 8.50  | -3279.462044022 | -3278.871525130 | -3279.556293557 | -3278.872246420 | -3279.654772682 |
| 8.60  | -3279.462043602 | -3278.871525120 | -3279.556293141 | -3278.872246420 | -3279.654772291 |
| 8.70  | -3279.462043234 | -3278.871525110 | -3279.556292762 | -3278.872246410 | -3279.654771943 |
| 8.80  | -3279.462042887 | -3278.871525110 | -3279.556292411 | -3278.872246400 | -3279.654771610 |
| 8.90  | -3279.462042567 | -3278.871525100 | -3279.556292088 | -3278.872246400 | -3279.654771313 |
| 9.00  | -3279.462042272 | -3278.871525100 | -3279.556291792 | -3278.872246400 | -3279.654771047 |
| 9.10  | -3279.462041991 | -3278.871525090 | -3279.556291518 | -3278.872246390 | -3279.654770780 |
| 9.20  | -3279.462041749 | -3278.871525090 | -3279.556291264 | -3278.872246390 | -3279.654770547 |
| 9.30  | -3279.462041517 | -3278.871525090 | -3279.556291032 | -3278.872246390 | -3279.654770335 |
| 9.40  | -3279.462041302 | -3278.871525090 | -3279.556290816 | -3278.872246380 | -3279.654770126 |
| 9.50  | -3279.462041104 | -3278.871525080 | -3279.556290615 | -3278.872246380 | -3279.654769952 |
| 9.60  | -3279.462040910 | -3278.871525080 | -3279.556290431 | -3278.872246380 | -3279.654769769 |
| 9.70  | -3279.462040749 | -3278.871525080 | -3279.556290259 | -3278.872246380 | -3279.654769606 |
| 9.80  | -3279.462040590 | -3278.871525080 | -3279.556290098 | -3278.872246380 | -3279.654769460 |
| 9.90  | -3279.462040443 | -3278.871525080 | -3279.556289951 | -3278.872246380 | -3279.654769321 |
| 10.00 | -3279.462040306 | -3278.871525080 | -3279.556289813 | -3278.872246380 | -3279.654769199 |
| 10.10 | -3279.462040169 | -3278.871525080 | -3279.556289684 | -3278.872246380 | -3279.654769072 |
| 10.20 | -3279.462040059 | -3278.871525080 | -3279.556289566 | -3278.872246380 | -3279.654768960 |
| 10.30 | -3279.462039949 | -3278.871525080 | -3279.556289454 | -3278.872246380 | -3279.654768854 |
| 10.40 | -3279.462039845 | -3278.871525080 | -3279.556289349 | -3278.872246380 | -3279.654768759 |
| 10.50 | -3279.462039749 | -3278.871525080 | -3279.556289254 | -3278.872246380 | -3279.654768678 |
| 10.60 | -3279.462039650 | -3278.871525080 | -3279.556289164 | -3278.872246380 | -3279.654768581 |
| 10.70 | -3279.462039575 | -3278.871525080 | -3279.556289078 | -3278.872246380 | -3279.654768504 |
| 10.80 | -3279.462039496 | -3278.871525080 | -3279.556289000 | -3278.872246380 | -3279.654768430 |
| 10.90 | -3279.462039423 | -3278.871525080 | -3279.556288926 | -3278.872246380 | -3279.654768358 |
| 11.00 | -3279.462039354 | -3278.871525080 | -3279.556288856 | -3278.872246380 | -3279.654768306 |
| 11.10 | -3279.462039280 | -3278.871525080 | -3279.556288793 | -3278.872246380 | -3279.654768235 |
| 11.20 | -3279.462039229 | -3278.871525080 | -3279.556288732 | -3278.872246380 | -3279.654768175 |
| 11.30 | -3279.462039172 | -3278.871525080 | -3279.556288674 | -3278.872246380 | -3279.654768124 |
| 11.40 | -3279.462039119 | -3278.871525080 | -3279.556288621 | -3278.872246380 | -3279.654768074 |
| 11.50 | -3279.462039069 | -3278.871525080 | -3279.556288571 | -3278.872246380 | -3279.654768034 |
| 11.60 | -3279.462039012 | -3278.871525080 | -3279.556288523 | -3278.872246380 | -3279.654767982 |
| 11.70 | -3279.462038977 | -3278.871525080 | -3279.556288480 | -3278.872246380 | -3279.654767940 |
| 11.80 | -3279.462038936 | -3278.871525080 | -3279.556288438 | -3278.872246380 | -3279.654767898 |
| 11.90 | -3279.462038897 | -3278.871525080 | -3279.556288398 | -3278.872246380 | -3279.654767864 |
| 12.00 | -3279.462038860 | -3278.871525080 | -3279.556288362 | -3278.872246380 | -3279.654767864 |

Table S14: Ar-Xe electronic energies (in Hartree) calculated at CCSD(T)/aug-cc-pV4Z (CCSD(T)-4Z), CCSD(T)/aug-cc-pV5Z (CCSD(T)-5Z), and CCSD(T)/CBS levels.

| R(Å) | CCSD(T)-4Z      | SCF-4Z          | CCSD(T)-5Z      | SCF-5Z          | CBS             |
|------|-----------------|-----------------|-----------------|-----------------|-----------------|
| 2.00 | -855.4109498880 | -854.7419495970 | -855.4996815005 | -854.7440716950 | -855.5915847821 |
| 2.10 | -855.4969198633 | -854.8325837790 | -855.5845016184 | -854.8341973190 | -855.6754841968 |
| 2.20 | -855.5622915676 | -854.9021623640 | -855.6489801693 | -854.9034341660 | -855.7392176548 |

|      |                 |                 |                 |                 |                 |
|------|-----------------|-----------------|-----------------|-----------------|-----------------|
| 2.30 | -855.6117334969 | -854.9553121870 | -855.6977293467 | -854.9563546110 | -855.7873688738 |
| 2.40 | -855.6489102281 | -854.9957125880 | -855.7343679739 | -854.9966014940 | -855.8235291782 |
| 2.50 | -855.6766963141 | -855.0262768950 | -855.7617360995 | -855.0270639610 | -855.8505160010 |
| 2.60 | -855.6973366542 | -855.0492972760 | -855.7820520803 | -855.0500175400 | -855.8705291993 |
| 2.70 | -855.7125733340 | -855.0665641950 | -855.7970367271 | -855.0672409800 | -855.8852738443 |
| 2.80 | -855.7237488497 | -855.0794661240 | -855.8080153558 | -855.0801145920 | -855.8960618113 |
| 2.90 | -855.7318905085 | -855.0890723990 | -855.8160019233 | -855.0897022230 | -855.9038961341 |
| 3.00 | -855.7377791470 | -855.0962013500 | -855.8217673039 | -855.0968186480 | -855.9095392319 |
| 3.10 | -855.7420043844 | -855.1014756080 | -855.8258940049 | -855.1020842730 | -855.9135674005 |
| 3.20 | -855.7450088234 | -855.1053664550 | -855.8288196288 | -855.1059690170 | -855.9164137618 |
| 3.30 | -855.7471228326 | -855.1082289480 | -855.8308707821 | -855.1088271130 | -855.9184014380 |
| 3.40 | -855.7485917053 | -855.1103294610 | -855.8322898087 | -855.1109244210 | -855.9197699678 |
| 3.50 | -855.7495965870 | -855.1118670620 | -855.8332554368 | -855.1124596780 | -855.9206957284 |
| 3.60 | -855.7502705039 | -855.1129899980 | -855.8338985339 | -855.1157354820 | -855.9200970231 |
| 3.70 | -855.7507105597 | -855.1138083000 | -855.8343144565 | -855.1143979070 | -855.9216987831 |
| 3.80 | -855.7509871891 | -855.1144033790 | -855.8345721264 | -855.1135808900 | -855.9227298671 |
| 3.90 | -855.7511511120 | -855.1148352810 | -855.8347210889 | -855.1154231650 | -855.9220707955 |
| 4.00 | -855.7512385721 | -855.1151481580 | -855.8347965852 | -855.1157354820 | -855.9221340541 |
| 4.10 | -855.7512752303 | -855.1153743790 | -855.8348236000 | -855.1159613280 | -855.9221511620 |
| 4.11 | -855.7512768504 | -855.1153932090 | -855.8348243524 | -855.1159801310 | -855.9221510191 |
| 4.12 | -855.7512781595 | -855.1154114340 | -855.8348248180 | -855.1159983300 | -855.9221506142 |
| 4.13 | -855.7512791735 | -855.1154290730 | -855.8348250047 | -855.1160159450 | -855.9221499465 |
| 4.14 | -855.7512799059 | -855.1154461440 | -855.8348249265 | -855.1160329950 | -855.9221490297 |
| 4.15 | -855.7512803728 | -855.1154626660 | -855.8348245974 | -855.1160494970 | -855.9221478766 |
| 4.16 | -855.7512805804 | -855.1154786560 | -855.8348240260 | -855.1160654700 | -855.9221464975 |
| 4.17 | -855.7512805439 | -855.1154941300 | -855.8348232237 | -855.1160809280 | -855.9221449006 |
| 4.18 | -855.7512802749 | -855.1155091060 | -855.8348222040 | -855.1160958900 | -855.9221431013 |
| 4.19 | -855.7512797842 | -855.1155235980 | -855.8348209755 | -855.1161103700 | -855.9221411054 |
| 4.20 | -855.7512790825 | -855.1156450800 | -855.8348195526 | -855.1161243840 | -855.9221993007 |
| 4.30 | -855.7512625782 | -855.1156551680 | -855.8347965180 | -855.1162419300 | -855.9221090453 |
| 4.40 | -855.7512342443 | -855.1157396160 | -855.8347627239 | -855.1163265460 | -855.9220694282 |
| 4.50 | -855.7511997894 | -855.1158001430 | -855.8347236706 | -855.1163873690 | -855.9220253840 |
| 4.60 | -855.7511629829 | -855.1158434270 | -855.8346829304 | -855.1164310260 | -855.9219803072 |
| 4.70 | -855.7511261736 | -855.1158743130 | -855.8346428272 | -855.1164623110 | -855.9219365240 |
| 4.80 | -855.7510908408 | -855.1158963130 | -855.8346046911 | -855.1164846910 | -855.9218952331 |
| 4.90 | -855.7510578010 | -855.1159119610 | -855.8345692933 | -855.1165006690 | -855.9218571759 |
| 5.00 | -855.7510274577 | -855.1159230770 | -855.8345369545 | -855.1165120510 | -855.9218225941 |
| 5.10 | -855.7509999372 | -855.1159309660 | -855.8345077697 | -855.1165201360 | -855.9217915530 |
| 5.20 | -855.7509752045 | -855.1159365560 | -855.8344816363 | -855.1165258670 | -855.9217638707 |
| 5.30 | -855.7509531206 | -855.1159405090 | -855.8344583980 | -855.1165299190 | -855.9217393656 |
| 5.40 | -855.7509334920 | -855.1159432970 | -855.8344378023 | -855.1165327780 | -855.9217177155 |
| 5.50 | -855.7509160982 | -855.1159452510 | -855.8344196184 | -855.1165347920 | -855.9216986689 |
| 5.60 | -855.7509007178 | -855.1159466130 | -855.8344035793 | -855.1165362130 | -855.9216819056 |
| 5.70 | -855.7508871307 | -855.1159475500 | -855.8343894528 | -855.1165372140 | -855.9216671771 |
| 5.80 | -855.7508751344 | -855.1159481840 | -855.8343770088 | -855.1165379210 | -855.9216542225 |
| 5.90 | -855.7508645409 | -855.1159486040 | -855.8343660469 | -855.1165384210 | -855.9216428291 |
| 6.00 | -855.7508551816 | -855.1159488700 | -855.8343563790 | -855.1165387720 | -855.9216327897 |
| 6.10 | -855.7508469048 | -855.1159490290 | -855.8343478463 | -855.1165390190 | -855.9216239391 |
| 6.20 | -855.7508395784 | -855.1159491120 | -855.8343403051 | -855.1165391900 | -855.9216161229 |
| 6.30 | -855.7508330790 | -855.1159491420 | -855.8343336313 | -855.1165393070 | -855.9216092173 |
| 6.40 | -855.7508273143 | -855.1159491350 | -855.8343277131 | -855.1165393850 | -855.9216030904 |
| 6.50 | -855.7508221888 | -855.1159491030 | -855.8343224595 | -855.1165394340 | -855.9215976569 |
| 6.60 | -855.7508176245 | -855.1159490550 | -855.8343177855 | -855.1165394620 | -855.9215928251 |
| 6.70 | -855.7508135525 | -855.1159489960 | -855.8343136216 | -855.1165394750 | -855.9215885244 |

|       |                 |                 |                 |                 |                 |
|-------|-----------------|-----------------|-----------------|-----------------|-----------------|
| 6.80  | -855.7508099144 | -855.1159489310 | -855.8343099043 | -855.1165394770 | -855.9215846862 |
| 6.90  | -855.7508066581 | -855.1159488630 | -855.8343065816 | -855.1165394700 | -855.9215812597 |
| 7.00  | -855.7508037384 | -855.1159487950 | -855.8343036038 | -855.1165394570 | -855.9215781900 |
| 7.10  | -855.7508011159 | -855.1159487270 | -855.8343009336 | -855.1165394400 | -855.9215754410 |
| 7.20  | -855.7507987573 | -855.1159486620 | -855.8342985318 | -855.1165394200 | -855.9215729685 |
| 7.30  | -855.7507966318 | -855.1159486000 | -855.8342963713 | -855.1165393990 | -855.9215707485 |
| 7.40  | -855.7507947135 | -855.1159485420 | -855.8342944214 | -855.1165393780 | -855.9215687445 |
| 7.50  | -855.7507929798 | -855.1159484870 | -855.8342926619 | -855.1165393570 | -855.9215669389 |
| 7.60  | -855.7507914103 | -855.1159484370 | -855.8342910681 | -855.1165393360 | -855.9215653035 |
| 7.70  | -855.7507899874 | -855.1159483900 | -855.8342896263 | -855.1165393180 | -855.9215638254 |
| 7.80  | -855.7507886954 | -855.1159483470 | -855.8342883162 | -855.1165393010 | -855.9215624817 |
| 7.90  | -855.7507875209 | -855.1159483090 | -855.8342871275 | -855.1165392850 | -855.9215612657 |
| 8.00  | -855.7507864517 | -855.1159482730 | -855.8342860441 | -855.1165392720 | -855.9215601545 |
| 8.10  | -855.7507854783 | -855.1159482420 | -855.8342850587 | -855.1165392600 | -855.9215591458 |
| 8.20  | -855.7507845885 | -855.1159482130 | -855.8342841579 | -855.1165392490 | -855.9215582234 |
| 8.30  | -855.7507837747 | -855.1159481880 | -855.8342833368 | -855.1165392390 | -855.9215573863 |
| 8.40  | -855.7507830306 | -855.1159481660 | -855.8342825840 | -855.1165392300 | -855.9215566169 |
| 8.50  | -855.7507823490 | -855.1159481460 | -855.8342818965 | -855.1165392220 | -855.9215559165 |
| 8.60  | -855.7507817239 | -855.1159481290 | -855.8342812643 | -855.1165392150 | -855.9215552713 |
| 8.70  | -855.7507811499 | -855.1159481140 | -855.8342806858 | -855.1165392080 | -855.9215546836 |
| 8.80  | -855.7507806224 | -855.1159481010 | -855.8342801524 | -855.1165392010 | -855.9215541407 |
| 8.90  | -855.7507801370 | -855.1159480900 | -855.8342796636 | -855.1165391950 | -855.9215536455 |
| 9.00  | -855.7507796899 | -855.1159480800 | -855.8342792117 | -855.1165391890 | -855.9215531863 |
| 9.10  | -855.7507792776 | -855.1159480720 | -855.8342787969 | -855.1165391830 | -855.9215527676 |
| 9.20  | -855.7507788973 | -855.1159480650 | -855.8342784124 | -855.1165391780 | -855.9215523776 |
| 9.30  | -855.7507785459 | -855.1159480600 | -855.8342780589 | -855.1165391720 | -855.9215520227 |
| 9.40  | -855.7507782210 | -855.1159480550 | -855.8342777305 | -855.1165391680 | -855.9215516899 |
| 9.50  | -855.7507779203 | -855.1159480510 | -855.8342774284 | -855.1165391630 | -855.9215513869 |
| 9.60  | -855.7507776417 | -855.1159480480 | -855.8342771466 | -855.1165391590 | -855.9215511024 |
| 9.70  | -855.7507773835 | -855.1159480460 | -855.8342768874 | -855.1165391560 | -855.9215508425 |
| 9.80  | -855.7507771440 | -855.1159480440 | -855.8342766450 | -855.1165391530 | -855.9215505977 |
| 9.90  | -855.7507769215 | -855.1159480420 | -855.8342764217 | -855.1165391500 | -855.9215503742 |
| 10.00 | -855.7507767147 | -855.1159480410 | -855.8342762125 | -855.1165391470 | -855.9215501635 |
| 10.10 | -855.7507765224 | -855.1159480400 | -855.8342760197 | -855.1165391450 | -855.9215499708 |
| 10.20 | -855.7507763434 | -855.1159480390 | -855.8342758384 | -855.1165391430 | -855.9215497877 |
| 10.30 | -855.7507761766 | -855.1159480390 | -855.8342756714 | -855.1165391410 | -855.9215496215 |
| 10.40 | -855.7507760212 | -855.1159480380 | -855.8342755139 | -855.1165391400 | -855.9215494619 |
| 10.50 | -855.7507758762 | -855.1159480380 | -855.8342753688 | -855.1165391390 | -855.9215493173 |
| 10.60 | -855.7507757408 | -855.1159480380 | -855.8342752316 | -855.1165391380 | -855.9215491787 |
| 10.70 | -855.7507756144 | -855.1159480370 | -855.8342751053 | -855.1165391370 | -855.9215490525 |
| 10.80 | -855.7507754961 | -855.1159480370 | -855.8342749853 | -855.1165391360 | -855.9215489312 |
| 10.90 | -855.7507753855 | -855.1159480370 | -855.8342748750 | -855.1165391360 | -855.9215488213 |
| 11.00 | -855.7507752820 | -855.1159480370 | -855.8342747699 | -855.1165391350 | -855.9215487150 |
| 11.10 | -855.7507751850 | -855.1159480370 | -855.8342746732 | -855.1165391350 | -855.9215486187 |
| 11.20 | -855.7507750942 | -855.1159480370 | -855.8342745809 | -855.1165391340 | -855.9215485254 |
| 11.30 | -855.7507750089 | -855.1159480370 | -855.8342744962 | -855.1165391340 | -855.9215484412 |
| 11.40 | -855.7507749290 | -855.1159480370 | -855.8342744148 | -855.1165391340 | -855.9215483583 |
| 11.50 | -855.7507748539 | -855.1159480370 | -855.8342743402 | -855.1165391340 | -855.9215482844 |
| 11.60 | -855.7507747833 | -855.1159480370 | -855.8342742684 | -855.1165391340 | -855.9215482111 |
| 11.70 | -855.7507747170 | -855.1159480370 | -855.8342742027 | -855.1165391340 | -855.9215481461 |
| 11.80 | -855.7507746546 | -855.1159480370 | -855.8342741391 | -855.1165391330 | -855.9215480817 |
| 11.90 | -855.7507745959 | -855.1159480370 | -855.8342740811 | -855.1165391330 | -855.9215480245 |
| 12.00 | -855.7507745407 | -855.1159480370 | -855.8342740246 | -855.1165391330 | -855.9215479668 |

Table S15: Ar-Rn electronic energies (in Hartree) calculated at CCSD(T)/aug-cc-pV4Z (CCSD(T)-4Z), CCSD(T)/aug-cc-pV5Z (CCSD(T)-5Z), and CCSD(T)/CBS levels.

| R(Å) | CCSD(T)-4Z      | SCF-4Z          | CCSD(T)-5Z      | SCF-5Z          | CBS             |
|------|-----------------|-----------------|-----------------|-----------------|-----------------|
| 3.00 | -815.0064580283 | -814.3364552870 | -815.1101898901 | -814.3370893770 | -815.2186670912 |
| 3.10 | -815.0115177209 | -814.3426687930 | -815.1151313930 | -814.3432914050 | -815.2234910401 |
| 3.20 | -815.0151576115 | -814.3472901780 | -815.1186756304 | -814.3479045510 | -815.2269395487 |
| 3.30 | -815.0177529721 | -814.3507195610 | -815.1211931206 | -814.3513278480 | -815.2293787579 |
| 3.40 | -815.0195839958 | -814.3532588250 | -815.1229608124 | -814.3538625190 | -815.2310825835 |
| 3.50 | -815.0208591084 | -814.3551350400 | -815.1241846822 | -814.3557352220 | -815.2322546632 |
| 3.60 | -815.0217325994 | -814.3565185150 | -815.1250170848 | -814.3571160000 | -815.2330454720 |
| 3.70 | -815.0223182715 | -814.3575366500 | -815.1255700527 | -814.3581320640 | -815.2335652908 |
| 3.80 | -815.0226995864 | -814.3582845030 | -815.1259254734 | -814.3588783290 | -815.2338944358 |
| 3.90 | -815.0229374108 | -814.3588328290 | -815.1261428452 | -814.3594254400 | -815.2340910318 |
| 4.00 | -815.0230758219 | -814.3592341600 | -815.1262651074 | -814.3598258580 | -815.2341968638 |
| 4.01 | -815.0230855066 | -814.3592678040 | -815.1262733691 | -814.3598594260 | -815.2342036752 |
| 4.02 | -815.0230945485 | -814.3593004080 | -815.1262810224 | -814.3598919560 | -815.2342099133 |
| 4.03 | -815.0231029723 | -814.3593320040 | -815.1262880902 | -814.3599234800 | -815.2342155989 |
| 4.04 | -815.0231108021 | -814.3593626220 | -815.1262945959 | -814.3599540290 | -815.2342207539 |
| 4.05 | -815.0231180609 | -814.3593922910 | -815.1263005619 | -814.3599836320 | -815.2342254007 |
| 4.06 | -815.0231247722 | -814.3594210420 | -815.1263060093 | -814.3600123190 | -815.2342295579 |
| 4.07 | -815.0231309580 | -814.3594489010 | -815.1263109592 | -814.3600401170 | -815.2342332455 |
| 4.08 | -815.0231366390 | -814.3594758970 | -815.1263154321 | -814.3600670540 | -815.2342364841 |
| 4.09 | -815.0231418357 | -814.3595020540 | -815.1263194479 | -814.3600931550 | -815.2342392923 |
| 4.10 | -815.0231465674 | -814.3595274000 | -815.1263230261 | -814.3601184470 | -815.2342416907 |
| 4.11 | -815.0231508543 | -814.3595519580 | -815.1263261844 | -814.3601429540 | -815.2342436934 |
| 4.12 | -815.0231547142 | -814.3595757530 | -815.1263289406 | -814.3601666990 | -815.2342453197 |
| 4.13 | -815.0231581649 | -814.3595988080 | -815.1263313120 | -814.3601897080 | -815.2342465846 |
| 4.14 | -815.0231612235 | -814.3596211460 | -815.1263333152 | -814.3602120010 | -815.2342475058 |
| 4.15 | -815.0231639067 | -814.3596427880 | -815.1263349667 | -814.3602336010 | -815.2342480985 |
| 4.16 | -815.0231662303 | -814.3596637550 | -815.1263362808 | -814.3602545290 | -815.2342483752 |
| 4.17 | -815.0231682102 | -814.3596840700 | -815.1263372734 | -814.3602748070 | -815.2342483528 |
| 4.18 | -815.0231698608 | -814.3597037510 | -815.1263379578 | -814.3602944530 | -815.2342480432 |
| 4.19 | -815.0231711969 | -814.3597228170 | -815.1263383489 | -814.3603134870 | -815.2342474608 |
| 4.20 | -815.0231722325 | -814.3597412890 | -815.1263384596 | -814.3603319280 | -815.2342466185 |
| 4.21 | -815.0231729804 | -814.3597591830 | -815.1263383025 | -814.3603497940 | -815.2342455276 |
| 4.22 | -815.0231734538 | -814.3597765170 | -815.1263378941 | -814.3603671040 | -815.2342442076 |
| 4.23 | -815.0231736652 | -814.3597933100 | -815.1263372388 | -814.3603838730 | -815.2342426563 |
| 4.24 | -815.0231736266 | -814.3598095770 | -815.1263363510 | -814.3604001190 | -815.2342408894 |
| 4.25 | -815.0231733497 | -814.3598253350 | -815.1263352433 | -814.3604158580 | -815.2342389207 |
| 4.26 | -815.0231728454 | -814.3598405980 | -815.1263339256 | -814.3604311050 | -815.2342367588 |
| 4.27 | -815.0231721245 | -814.3598553830 | -815.1263324081 | -814.3604458760 | -815.2342344132 |
| 4.28 | -815.0231711973 | -814.3598697050 | -815.1263307016 | -814.3604601850 | -815.2342318965 |
| 4.29 | -815.0231700742 | -814.3598835760 | -815.1263288140 | -814.3604740470 | -815.2342292117 |
| 4.30 | -815.0231687645 | -814.3598970120 | -815.1263267562 | -814.3604874750 | -815.2342263735 |
| 4.40 | -815.0231473052 | -814.3600101650 | -815.1262985666 | -814.3606006580 | -815.2341911058 |
| 4.50 | -815.0231154618 | -814.3600922110 | -815.1262611914 | -814.3606829070 | -815.2341478127 |
| 4.60 | -815.0230784143 | -814.3601515740 | -815.1262195290 | -814.3607425950 | -815.2341011259 |
| 4.70 | -815.0230395662 | -814.3601944370 | -815.1261767953 | -814.3607858480 | -815.2340540964 |
| 4.80 | -815.0230010922 | -814.3602253310 | -815.1261350306 | -814.3608171460 | -815.2340086522 |
| 4.90 | -815.0229643173 | -814.3602475660 | -815.1260954545 | -814.3608397550 | -815.2339659269 |
| 5.00 | -815.0229299901 | -814.3602635550 | -815.1260587421 | -814.3608560590 | -815.2339265352 |
| 5.10 | -815.0228984688 | -814.3602750450 | -815.1260251894 | -814.3608677910 | -815.2338907151 |
| 5.20 | -815.0228698643 | -814.3602832980 | -815.1259948618 | -814.3608762150 | -815.2338584837 |
| 5.30 | -815.0228441181 | -814.3602892200 | -815.1259676564 | -814.3608822480 | -815.2338296849 |



|       |                 |                 |                 |                 |                 |
|-------|-----------------|-----------------|-----------------|-----------------|-----------------|
| 5.40  | -815.0228210891 | -814.3602934640 | -815.1259433975 | -814.3608865610 | -815.2338040970 |
| 5.50  | -815.0228005777 | -814.3602964960 | -815.1259218517 | -814.3608896380 | -815.2337814405 |
| 5.60  | -815.0227823692 | -814.3602986520 | -815.1259027724 | -814.3608918330 | -815.2337614257 |
| 5.70  | -815.0227662238 | -814.3603001740 | -815.1258859049 | -814.3608933990 | -815.2337437759 |
| 5.80  | -815.0227519290 | -814.3603012360 | -815.1258710033 | -814.3608945190 | -815.2337282050 |
| 5.90  | -815.0227392783 | -814.3603019670 | -815.1258578740 | -814.3608953200 | -815.2337145342 |
| 6.00  | -815.0227280815 | -814.3603024590 | -815.1258462634 | -814.3608958940 | -815.2337024435 |
| 6.10  | -815.0227181666 | -814.3603027800 | -815.1258360052 | -814.3608963040 | -815.2336917750 |
| 6.20  | -815.0227093803 | -814.3603029780 | -815.1258269331 | -814.3608965960 | -815.2336823502 |
| 6.30  | -815.0227015860 | -814.3603030900 | -815.1258189004 | -814.3608968020 | -815.2336740147 |
| 6.40  | -815.0226946629 | -814.3603031410 | -815.1258117778 | -814.3608969450 | -815.2336666310 |
| 6.50  | -815.0226885054 | -814.3603031500 | -815.1258054525 | -814.3608970410 | -815.2336600808 |
| 6.60  | -815.0226830206 | -814.3603031300 | -815.1257998266 | -814.3608971030 | -815.2336542609 |
| 6.70  | -815.0226781275 | -814.3603030910 | -815.1257948142 | -814.3608971410 | -815.2336490800 |
| 6.80  | -815.0226737552 | -814.3603030410 | -815.1257903406 | -814.3608971610 | -815.2336444607 |
| 6.90  | -815.0226698419 | -814.3603029840 | -815.1257863412 | -814.3608971680 | -815.2336403351 |
| 7.00  | -815.0226663338 | -814.3603029240 | -815.1257827593 | -814.3608971650 | -815.2336366437 |
| 7.10  | -815.0226631837 | -814.3603028640 | -815.1257795456 | -814.3608971560 | -815.2336333348 |
| 7.20  | -815.0226603505 | -814.3603028040 | -815.1257766584 | -814.3608971420 | -815.2336303650 |
| 7.30  | -815.0226577981 | -814.3603027470 | -815.1257740595 | -814.3608971250 | -815.2336276948 |
| 7.40  | -815.0226554952 | -814.3603026920 | -815.1257717163 | -814.3608971060 | -815.2336252891 |
| 7.50  | -815.0226534143 | -814.3603026410 | -815.1257696004 | -814.3608970860 | -815.2336231191 |
| 7.60  | -815.0226515309 | -814.3603025930 | -815.1257676868 | -814.3608970650 | -815.2336211586 |
| 7.70  | -815.0226498238 | -814.3603025480 | -815.1257659535 | -814.3608970460 | -815.2336193831 |
| 7.80  | -815.0226482744 | -814.3603025070 | -815.1257643811 | -814.3608970260 | -815.2336177750 |
| 7.90  | -815.0226468689 | -814.3603024690 | -815.1257629528 | -814.3608970090 | -815.2336163109 |
| 8.00  | -815.0226455855 | -814.3603024330 | -815.1257616535 | -814.3608969920 | -815.2336149841 |
| 8.10  | -815.0226444169 | -814.3603024010 | -815.1257604699 | -814.3608969760 | -815.2336137759 |
| 8.20  | -815.0226433507 | -814.3603023710 | -815.1257593903 | -814.3608969620 | -815.2336126732 |
| 8.30  | -815.0226423764 | -814.3603023440 | -815.1257584044 | -814.3608969490 | -815.2336116673 |
| 8.40  | -815.0226414851 | -814.3603023190 | -815.1257575028 | -814.3608969380 | -815.2336107471 |
| 8.50  | -815.0226406686 | -814.3603022970 | -815.1257566774 | -814.3608969270 | -815.2336099062 |
| 8.60  | -815.0226399200 | -814.3603022770 | -815.1257559209 | -814.3608969170 | -815.2336091356 |
| 8.70  | -815.0226392327 | -814.3603022590 | -815.1257552266 | -814.3608969080 | -815.2336084290 |
| 8.80  | -815.0226386012 | -814.3603022430 | -815.1257545889 | -814.3608969000 | -815.2336077803 |
| 8.90  | -815.0226380201 | -814.3603022280 | -815.1257540023 | -814.3608968920 | -815.2336071840 |
| 9.00  | -815.0226374850 | -814.3603022160 | -815.1257534624 | -814.3608968850 | -815.2336066362 |
| 9.10  | -815.0226369917 | -814.3603022050 | -815.1257529646 | -814.3608968780 | -815.2336061315 |
| 9.20  | -815.0226365365 | -814.3603021950 | -815.1257525057 | -814.3608968720 | -815.2336056664 |
| 9.30  | -815.0226361161 | -814.3603021870 | -815.1257520819 | -814.3608968670 | -815.2336052374 |
| 9.40  | -815.0226357273 | -814.3603021800 | -815.1257516901 | -814.3608968610 | -815.2336048419 |
| 9.50  | -815.0226353676 | -814.3603021740 | -815.1257513277 | -814.3608968570 | -815.2336044756 |
| 9.60  | -815.0226350345 | -814.3603021680 | -815.1257509921 | -814.3608968520 | -815.2336041368 |
| 9.70  | -815.0226347257 | -814.3603021640 | -815.1257506811 | -814.3608968480 | -815.2336038234 |
| 9.80  | -815.0226344392 | -814.3603021600 | -815.1257503926 | -814.3608968450 | -815.2336035323 |
| 9.90  | -815.0226341732 | -814.3603021570 | -815.1257501249 | -814.3608968420 | -815.2336032628 |
| 10.00 | -815.0226339259 | -814.3603021550 | -815.1257498760 | -814.3608968390 | -815.2336030128 |
| 10.10 | -815.0226336960 | -814.3603021530 | -815.1257496446 | -814.3608968370 | -815.2336027799 |
| 10.20 | -815.0226334821 | -814.3603021510 | -815.1257494294 | -814.3608968340 | -815.2336025638 |
| 10.30 | -815.0226332827 | -814.3603021500 | -815.1257492289 | -814.3608968330 | -815.2336023622 |
| 10.40 | -815.0226330969 | -814.3603021490 | -815.1257490420 | -814.3608968310 | -815.2336021747 |
| 10.50 | -815.0226329236 | -814.3603021480 | -815.1257488677 | -814.3608968300 | -815.2336019993 |
| 10.60 | -815.0226327618 | -814.3603021470 | -815.1257487051 | -814.3608968280 | -815.2336018363 |
| 10.70 | -815.0226326107 | -814.3603021470 | -815.1257485532 | -814.3608968270 | -815.2336016842 |

|       |                 |                 |                 |                 |                 |
|-------|-----------------|-----------------|-----------------|-----------------|-----------------|
| 10.80 | -815.0226324695 | -814.3603021460 | -815.1257484112 | -814.3608968270 | -815.2336015409 |
| 10.90 | -815.0226323374 | -814.3603021460 | -815.1257482784 | -814.3608968260 | -815.2336014080 |
| 11.00 | -815.0226322137 | -814.3603021460 | -815.1257481541 | -814.3608968250 | -815.2336012836 |
| 11.10 | -815.0226320979 | -814.3603021460 | -815.1257480377 | -814.3608968250 | -815.2336011665 |
| 11.20 | -815.0226319893 | -814.3603021450 | -815.1257479287 | -814.3608968240 | -815.2336010570 |
| 11.30 | -815.0226318875 | -814.3603021450 | -815.1257478265 | -814.3608968240 | -815.2336009544 |
| 11.40 | -815.0226317920 | -814.3603021450 | -815.1257477305 | -814.3608968240 | -815.2336008580 |
| 11.50 | -815.0226317023 | -814.3603021450 | -815.1257476405 | -814.3608968240 | -815.2336007676 |
| 11.60 | -815.0226316181 | -814.3603021450 | -815.1257475559 | -814.3608968230 | -815.2336006832 |
| 11.70 | -815.0226315389 | -814.3603021450 | -815.1257474765 | -814.3608968230 | -815.2336006035 |
| 11.80 | -815.0226314644 | -814.3603021450 | -815.1257474017 | -814.3608968230 | -815.2336005284 |
| 11.90 | -815.0226313944 | -814.3603021450 | -815.1257473313 | -814.3608968230 | -815.2336004577 |
| 12.00 | -815.0226313284 | -814.3603021450 | -815.1257472651 | -814.3608968230 | -815.2336003913 |

Table S16: Kr<sub>2</sub> electronic energies (in Hartree) calculated at CCSD(T)/aug-cc-pV4Z (CCSD(T)-4Z), CCSD(T)/aug-cc-pV5Z (CCSD(T)-5Z), and CCSD(T)/CBS levels.

| R(Å) | CCSD(T)-4Z      | SCF-4Z          | CCSD(T)-5Z      | SCF-5Z          | CBS             |
|------|-----------------|-----------------|-----------------|-----------------|-----------------|
| 2.00 | -5504.444070238 | -5503.744268120 | -5504.619534084 | -5503.744805270 | -5504.803325533 |
| 2.10 | -5504.529639216 | -5503.835167840 | -5504.704464797 | -5503.835651340 | -5504.887616729 |
| 2.20 | -5504.594130548 | -5503.904258180 | -5504.768431063 | -5503.904709150 | -5504.951050384 |
| 2.30 | -5504.642471455 | -5503.956530920 | -5504.816325164 | -5503.956959170 | -5504.998488468 |
| 2.40 | -5504.678499577 | -5503.995899020 | -5504.851966252 | -5503.996309550 | -5505.033733441 |
| 2.50 | -5504.705193326 | -5504.025419240 | -5504.878325956 | -5504.025815280 | -5505.059750812 |
| 2.60 | -5504.724851257 | -5504.047464790 | -5504.897700551 | -5504.047848990 | -5505.078834788 |
| 2.70 | -5504.739236841 | -5504.063865610 | -5504.911850638 | -5504.064240340 | -5505.092743116 |
| 2.80 | -5504.749694584 | -5504.076023400 | -5504.922116391 | -5504.076390910 | -5505.102811493 |
| 2.90 | -5504.757243042 | -5504.085005450 | -5504.929511044 | -5504.085367830 | -5505.110047660 |
| 3.00 | -5504.762649014 | -5504.091620090 | -5504.934795871 | -5504.091979150 | -5505.115207250 |
| 3.10 | -5504.766486432 | -5504.096476570 | -5504.938539434 | -5504.102983780 | -5505.115398352 |
| 3.20 | -5504.769182616 | -5504.100032000 | -5504.941163982 | -5504.100388230 | -5505.121403319 |
| 3.30 | -5504.771053979 | -5504.102627870 | -5504.942981290 | -5504.096833720 | -5505.126619158 |
| 3.40 | -5504.772333640 | -5504.104518290 | -5504.944220497 | -5504.091979150 | -5505.131605212 |
| 3.50 | -5504.773192341 | -5504.105891620 | -5504.945048999 | -5504.106247550 | -5505.125157665 |
| 3.60 | -5504.773754384 | -5504.106886990 | -5504.945588420 | -5504.107242970 | -5505.125673323 |
| 3.70 | -5504.774109699 | -5504.107606810 | -5504.945926584 | -5504.107962840 | -5505.125993464 |
| 3.80 | -5504.774322819 | -2752.054722200 | -5504.946126472 | -5504.108482320 | -3959.040825154 |
| 3.90 | -5504.774439728 | -5504.108500260 | -5504.946232930 | -5504.108482320 | -5505.126485057 |
| 4.00 | -5504.774492862 | -5504.108769050 | -5504.946277572 | -5504.109125370 | -5505.126310532 |
| 4.01 | -5504.774495612 | -5504.108791340 | -5504.946279560 | -5504.109147680 | -5505.126311708 |
| 4.02 | -5504.774497976 | -5504.108812910 | -5504.946281157 | -5504.109169260 | -5505.126312496 |
| 4.03 | -5504.774499965 | -5504.108833770 | -5504.946282409 | -5504.109190140 | -5505.126312963 |
| 4.04 | -5504.774501603 | -5504.108853940 | -5504.946283318 | -5504.109210330 | -5505.126313097 |
| 4.05 | -5504.774502903 | -5504.108873460 | -5504.946283905 | -5504.109229860 | -5505.126312930 |
| 4.06 | -5504.774503883 | -5504.108892330 | -5504.946284185 | -5504.109248750 | -5505.126312465 |
| 4.07 | -5504.774504556 | -5504.108910590 | -5504.946284174 | -5504.109267030 | -5505.126311723 |
| 4.08 | -5504.774504938 | -5504.108928250 | -5504.946283881 | -5504.109284700 | -5505.126310718 |
| 4.09 | -5504.774505043 | -5504.108945330 | -5504.946283317 | -5504.109301790 | -5505.126309446 |
| 4.10 | -5504.774504883 | -5504.108961850 | -5504.946282491 | -5504.109318330 | -5505.126307911 |
| 4.11 | -5504.774504472 | -5504.108977820 | -5504.946281432 | -5504.109334320 | -5505.126306159 |
| 4.12 | -5504.774503823 | -5504.108993270 | -5504.946280141 | -5504.109349780 | -5505.126304190 |
| 4.13 | -5504.774502947 | -5504.109008220 | -5504.946278641 | -5504.109364740 | -5505.126302030 |
| 4.14 | -5504.774501855 | -5504.109022670 | -5504.946276947 | -5504.109379200 | -5505.126299698 |
| 4.15 | -5504.774500560 | -5504.109036640 | -5504.946275050 | -5504.109393190 | -5505.126297159 |

|      |                 |                 |                 |                 |                 |
|------|-----------------|-----------------|-----------------|-----------------|-----------------|
| 4.16 | -5504.774499070 | -5504.109050160 | -5504.946272957 | -5504.109406720 | -5505.126294427 |
| 4.17 | -5504.774497398 | -5504.109063230 | -5504.946270698 | -5504.109419810 | -5505.126291540 |
| 4.18 | -5504.774495552 | -5504.109075870 | -5504.946268241 | -5504.109432460 | -5505.126288437 |
| 4.19 | -5504.774493541 | -5504.109088090 | -5504.946265687 | -5504.109444690 | -5505.126285308 |
| 4.20 | -5504.774491372 | -5504.109099910 | -5504.946262980 | -5504.109456520 | -5505.126282032 |
| 4.30 | -5504.774462930 | -5504.109198640 | -5504.946229343 | -5504.109555340 | -5505.126242893 |
| 4.40 | -5504.774426632 | -5504.109269140 | -5504.946188536 | -5504.109625880 | -5505.126197333 |
| 4.50 | -5504.774387075 | -5504.109319440 | -5504.946145065 | -5504.109676160 | -5505.126149766 |
| 4.60 | -5504.774347174 | -5504.109355270 | -5504.946101780 | -5504.109711950 | -5505.126102953 |
| 4.70 | -5504.774308689 | -5504.109380750 | -5504.946060447 | -5504.109737410 | -5505.126058644 |
| 4.80 | -5504.774272622 | -5504.109398840 | -5504.946021959 | -5504.109755490 | -5505.126017621 |
| 4.90 | -5504.774239463 | -5504.109411630 | -5504.945986785 | -5504.109768320 | -5505.125980310 |
| 5.00 | -5504.774209404 | -5504.109420660 | -5504.945955017 | -5504.109777410 | -5505.125946715 |
| 5.10 | -5504.774182409 | -5504.109426990 | -5504.945926609 | -5504.109783850 | -5505.125916763 |
| 5.20 | -5504.774158321 | -5504.109431420 | -5504.945901383 | -5504.109788390 | -5505.125890281 |
| 5.30 | -5504.774136947 | -5504.109434500 | -5504.945879067 | -5504.109791590 | -5505.125866909 |
| 5.40 | -5504.774118030 | -5504.109436630 | -5504.945859352 | -5504.109793830 | -5505.125846295 |
| 5.50 | -5504.774101330 | -5504.109438090 | -5504.945842019 | -5504.109795390 | -5505.125828244 |
| 5.60 | -5504.774086611 | -5504.109439100 | -5504.945826764 | -5504.109796470 | -5505.125812385 |
| 5.70 | -5504.774073626 | -5504.109439790 | -5504.945813357 | -5504.109797220 | -5505.125798503 |
| 5.80 | -5504.774062188 | -5504.109440260 | -5504.945801562 | -5504.109797730 | -5505.125786310 |
| 5.90 | -5504.774052104 | -5504.109440570 | -5504.945791186 | -5504.109798070 | -5505.125775612 |
| 6.00 | -5504.774043205 | -5504.109440790 | -5504.945782037 | -5504.109798310 | -5505.125766190 |
| 6.10 | -5504.774035350 | -5504.109440930 | -5504.945773972 | -5504.109798480 | -5505.125757887 |
| 6.20 | -5504.774028390 | -5504.109441010 | -5504.945766848 | -5504.109798600 | -5505.125750569 |
| 6.30 | -5504.774022231 | -5504.109441070 | -5504.945760546 | -5504.109798680 | -5505.125744104 |
| 6.40 | -5504.774016767 | -5504.109441090 | -5504.945754961 | -5504.109798740 | -5505.125738370 |
| 6.50 | -5504.774011911 | -5504.109441100 | -5504.945750003 | -5504.109798780 | -5505.125733288 |
| 6.60 | -5504.774007596 | -5504.109441090 | -5504.945745593 | -5504.109798810 | -5505.125728756 |
| 6.70 | -5504.774003733 | -5504.109441070 | -5504.945741672 | -5504.109798830 | -5505.125724753 |
| 6.80 | -5504.774000277 | -5504.109441040 | -5504.945738157 | -5504.109798840 | -5505.125721153 |
| 6.90 | -5504.773997206 | -5504.109441010 | -5504.945735021 | -5504.109798850 | -5505.125717926 |
| 7.00 | -5504.773994432 | -5504.109440970 | -5504.945732212 | -5504.109798850 | -5505.125715057 |
| 7.10 | -5504.773991967 | -5504.109440940 | -5504.945729690 | -5504.109798850 | -5505.125712459 |
| 7.20 | -5504.773989725 | -5504.109440900 | -5504.945727421 | -5504.109798840 | -5505.125710144 |
| 7.30 | -5504.773987704 | -5504.109440860 | -5504.945725381 | -5504.109798830 | -5505.125708068 |
| 7.40 | -5504.773985888 | -5504.109440830 | -5504.945723539 | -5504.109798820 | -5505.125706187 |
| 7.50 | -5504.773984246 | -5504.109440800 | -5504.945721874 | -5504.109798810 | -5505.125704488 |
| 7.60 | -5504.773982771 | -5504.109440770 | -5504.945720368 | -5504.109798790 | -5505.125702944 |
| 7.70 | -5504.773981423 | -5504.109440740 | -5504.945719003 | -5504.109798780 | -5505.125701548 |
| 7.80 | -5504.773980187 | -5504.109440720 | -5504.945717764 | -5504.109798770 | -5505.125700300 |
| 7.90 | -5504.773979074 | -5504.109440700 | -5504.945716637 | -5504.109798760 | -5505.125699154 |
| 8.00 | -5504.773978059 | -5504.109440680 | -5504.945715612 | -5504.109798750 | -5505.125698112 |
| 8.10 | -5504.773977142 | -5504.109440660 | -5504.945714677 | -5504.109798740 | -5505.125697153 |
| 8.20 | -5504.773976288 | -5504.109440640 | -5504.945713822 | -5504.109798730 | -5505.125696291 |
| 8.30 | -5504.773975516 | -5504.109440630 | -5504.945713045 | -5504.109798720 | -5505.125695509 |
| 8.40 | -5504.773974809 | -5504.109440610 | -5504.945712331 | -5504.109798710 | -5505.125694783 |
| 8.50 | -5504.773974161 | -5504.109440600 | -5504.945711678 | -5504.109798710 | -5505.125694118 |
| 8.60 | -5504.773973576 | -5504.109440590 | -5504.945711079 | -5504.109798700 | -5505.125693504 |
| 8.70 | -5504.773973021 | -5504.109440580 | -5504.945710529 | -5504.109798690 | -5505.125692960 |
| 8.80 | -5504.773972519 | -5504.109440570 | -5504.945710023 | -5504.109798690 | -5505.125692445 |
| 8.90 | -5504.773972057 | -5504.109440560 | -5504.945709558 | -5504.109798680 | -5505.125691976 |
| 9.00 | -5504.773971632 | -5504.109440550 | -5504.945709130 | -5504.109798680 | -5505.125691539 |
| 9.10 | -5504.773971240 | -5504.109440550 | -5504.945708735 | -5504.109798670 | -5505.125691147 |

|       |                 |                 |                 |                 |                 |
|-------|-----------------|-----------------|-----------------|-----------------|-----------------|
| 9.20  | -5504.773970878 | -5504.109440540 | -5504.945708371 | -5504.109798670 | -5505.125690775 |
| 9.30  | -5504.773970543 | -5504.109440540 | -5504.945708034 | -5504.109798670 | -5505.125690436 |
| 9.40  | -5504.773970234 | -5504.109440530 | -5504.945707722 | -5504.109798660 | -5505.125690122 |
| 9.50  | -5504.773969947 | -5504.109440530 | -5504.945707434 | -5504.109798660 | -5505.125689832 |
| 9.60  | -5504.773969682 | -5504.109440530 | -5504.945707167 | -5504.109798660 | -5505.125689564 |
| 9.70  | -5504.773969436 | -5504.109440520 | -5504.945706920 | -5504.109798660 | -5505.125689309 |
| 9.80  | -5504.773969207 | -5504.109440520 | -5504.945706691 | -5504.109798660 | -5505.125689079 |
| 9.90  | -5504.773968995 | -5504.109440520 | -5504.945706477 | -5504.109798650 | -5505.125688870 |
| 10.00 | -5504.773968798 | -5504.109440510 | -5504.945706279 | -5504.109798650 | -5505.125688665 |
| 10.10 | -5504.773968615 | -5504.109440510 | -5504.945706095 | -5504.109798650 | -5505.125688480 |
| 10.20 | -5504.773968444 | -5504.109440510 | -5504.945705924 | -5504.109798650 | -5505.125688308 |
| 10.30 | -5504.773968285 | -5504.109440510 | -5504.945705764 | -5504.109798650 | -5505.125688147 |
| 10.40 | -5504.773968136 | -5504.109440510 | -5504.945705615 | -5504.109798650 | -5505.125687998 |
| 10.50 | -5504.773967998 | -5504.109440510 | -5504.945705476 | -5504.109798650 | -5505.125687859 |
| 10.60 | -5504.773967869 | -5504.109440510 | -5504.945705346 | -5504.109798650 | -5505.125687728 |
| 10.70 | -5504.773967748 | -5504.109440510 | -5504.945705225 | -5504.109798650 | -5505.125687606 |
| 10.80 | -5504.773967635 | -5504.109440510 | -5504.945705112 | -5504.109798650 | -5505.125687493 |
| 10.90 | -5504.773967530 | -5504.109440510 | -5504.945705006 | -5504.109798650 | -5505.125687386 |
| 11.00 | -5504.773967441 | -5504.109440510 | -5504.945704907 | -5504.109798650 | -5505.125687276 |
| 11.10 | -5504.773967338 | -5504.109440510 | -5504.945704814 | -5504.109798650 | -5505.125687194 |
| 11.20 | -5504.773967251 | -5504.109440510 | -5504.945704727 | -5504.109798650 | -5505.125687106 |
| 11.30 | -5504.773967170 | -5504.109440510 | -5504.945704645 | -5504.109798650 | -5505.125687024 |
| 11.40 | -5504.773967093 | -5504.109440510 | -5504.945704568 | -5504.109798650 | -5505.125686948 |
| 11.50 | -5504.773967022 | -5504.109440510 | -5504.945704496 | -5504.109798650 | -5505.125686875 |
| 11.60 | -5504.773966954 | -5504.109440510 | -5504.945704429 | -5504.109798650 | -5505.125686808 |
| 11.70 | -5504.773966891 | -5504.109440510 | -5504.945704365 | -5504.109798650 | -5505.125686744 |
| 11.80 | -5504.773966831 | -5504.109440510 | -5504.945704305 | -5504.109798650 | -5505.125686684 |
| 11.90 | -5504.773966775 | -5504.109440510 | -5504.945704249 | -5504.109798650 | -5505.125686627 |
| 12.00 | -5504.773966722 | -5504.109440510 | -5504.945704196 | -5504.109798650 | -5505.125686575 |

Table S17: Kr-Xe electronic energies (in Hartree) calculated at CCSD(T)/aug-cc-pV4Z (CCSD(T)-4Z), CCSD(T)/aug-cc-pV5Z (CCSD(T)-5Z), and CCSD(T)/CBS levels.

| R(Å) | CCSD(T)-4Z      | SCF-4Z          | CCSD(T)-5Z      | SCF-5Z          | CBS             |
|------|-----------------|-----------------|-----------------|-----------------|-----------------|
| 2.00 | -3080.594904091 | -3079.843552360 | -3080.761620845 | -3079.844434630 | -3080.936041131 |
| 2.10 | -3080.709649308 | -3079.963628400 | -3080.875335033 | -3079.964257870 | -3081.048815605 |
| 2.20 | -3080.797335399 | -3080.056244250 | -3080.962201470 | -3080.056729700 | -3081.134902986 |
| 2.30 | -3080.864203177 | -3080.127537210 | -3081.028399984 | -3080.127938830 | -3081.200446416 |
| 2.40 | -3080.915035846 | -3080.182275000 | -3081.078674784 | -3080.182625070 | -3081.250164872 |
| 2.50 | -3080.953526324 | -3080.224174410 | -3081.116694464 | -3080.224490190 | -3081.287709863 |
| 2.60 | -3080.982539179 | -3080.256141460 | -3081.145308703 | -3080.256432810 | -3081.315919608 |
| 2.70 | -3081.004298809 | -3080.280448750 | -3081.166732359 | -3080.280721970 | -3081.337000951 |
| 2.80 | -3081.020529976 | -3080.298869970 | -3081.182682833 | -3080.299129480 | -3081.352664631 |
| 2.90 | -3081.032566166 | -3080.312784750 | -3081.194486902 | -3080.313033920 | -3081.364230972 |
| 3.00 | -3081.041434526 | -3080.323262020 | -3081.203165194 | -3080.323503500 | -3081.372714168 |
| 3.10 | -3081.047922858 | -3080.331126600 | -3081.209499363 | -3080.331362570 | -3081.378889687 |
| 3.20 | -3081.052632573 | -3080.337012380 | -3081.214085187 | -3080.337244590 | -3081.383347639 |
| 3.30 | -3081.056020677 | -3080.341404590 | -3081.217374646 | -3080.341634370 | -3081.386534968 |
| 3.40 | -3081.058432621 | -3080.344673220 | -3081.219708742 | -3080.344901520 | -3081.388788218 |
| 3.50 | -3081.060128296 | -3080.347099300 | -3081.221343589 | -3080.347326750 | -3081.390359724 |
| 3.60 | -3081.061302211 | -3080.348895500 | -3081.222470332 | -3080.349122480 | -3081.391437237 |
| 3.70 | -3081.062099142 | -3080.350222160 | -3081.223230922 | -3080.350448890 | -3081.392159841 |
| 3.80 | -3081.062626228 | -3080.351199790 | -3081.223730063 | -3080.351426390 | -3081.392629736 |
| 3.90 | -3081.062962258 | -3080.351918640 | -3081.224044601 | -3080.352145170 | -3081.392921763 |

|      |                 |                 |                 |                 |                 |
|------|-----------------|-----------------|-----------------|-----------------|-----------------|
| 4.00 | -3081.063164762 | -3080.352446100 | -3081.224230456 | -3080.352672600 | -3081.393090167 |
| 4.10 | -3081.063275421 | -3080.352832330 | -3081.224328084 | -3080.353058850 | -3081.393174113 |
| 4.20 | -3081.063324195 | -3080.353114620 | -3081.224366461 | -3080.353341170 | -3081.393201564 |
| 4.21 | -3081.063326557 | -3080.353138260 | -3081.224367893 | -3080.353364810 | -3081.393202021 |
| 4.22 | -3081.063328527 | -3080.353161170 | -3081.224368959 | -3080.353387730 | -3081.393202133 |
| 4.23 | -3081.063330130 | -3080.353183370 | -3081.224369677 | 3080.353409930  | -6542.437443383 |
| 4.24 | -3081.063331382 | -3080.353204870 | -3081.224370062 | -3080.353431440 | -3081.393201392 |
| 4.25 | -3081.063332296 | -3080.353225710 | -3081.224370131 | -3080.353452280 | -3081.393200574 |
| 4.26 | -3081.063332897 | -3080.353245900 | -3081.224369891 | -3080.353472470 | -3081.393199452 |
| 4.29 | -3081.063332909 | -3080.353302770 | -3081.224367492 | -3080.353547140 | -3081.393184522 |
| 4.30 | -3081.063332362 | -3080.353320550 | -3081.224366171 | -3080.353547140 | -3081.393192378 |
| 4.40 | -3081.063314865 | -3080.353470530 | -3081.224341703 | -3080.353697160 | -3081.393160575 |
| 4.50 | -3081.063282082 | -3080.353579570 | -3081.224303049 | -3080.353806240 | -3081.393115738 |
| 4.60 | -3081.063241067 | -3080.353658750 | -3081.224257038 | -3080.353885430 | -3081.393064480 |
| 4.70 | -3081.063196524 | -3080.353716160 | -3081.224208197 | -3080.353942840 | -3081.393011131 |
| 4.80 | -3081.063151514 | -3080.353757730 | -3081.224159472 | -3080.353984400 | -3081.392958511 |
| 4.90 | -3081.063107907 | -3080.353787800 | -3081.224112670 | -3080.354014450 | -3081.392908369 |
| 5.00 | -3081.063066827 | -3080.353809500 | -3081.224068852 | -3080.354036150 | -3081.392861678 |
| 5.10 | -3081.063028856 | -3080.353825140 | -3081.224028553 | -3080.354051800 | -3081.392818933 |
| 5.20 | -3081.062994226 | -3080.353836380 | -3081.223991926 | -3080.354063080 | -3081.392780188 |
| 5.30 | -3081.062962936 | -3080.353844430 | -3081.223958950 | -3080.354071190 | -3081.392745408 |
| 5.40 | -3081.062934863 | -3080.353850190 | -3081.223929475 | -3080.354077020 | -3081.392714423 |
| 5.50 | -3081.062909800 | -3080.353854280 | -3081.223903233 | -3080.354081200 | -3081.392686893 |
| 5.60 | -3081.062887503 | -3080.353857180 | -3081.223879968 | -3080.354084190 | -3081.392662563 |
| 5.70 | -3081.062867714 | -3080.353859230 | -3081.223859365 | -3080.354086330 | -3081.392641055 |
| 5.80 | -3081.062850176 | -3080.353860680 | -3081.223841162 | -3080.354087850 | -3081.392622116 |
| 5.90 | -3081.062834644 | -3080.353861690 | -3081.223825077 | -3080.354088930 | -3081.392605411 |
| 6.00 | -3081.062820894 | -3080.353862400 | -3081.223810872 | -3080.354089690 | -3081.392590700 |
| 6.10 | -3081.062808717 | -3080.353862900 | -3081.223798311 | -3080.354090230 | -3081.392577713 |
| 6.20 | -3081.062797927 | -3080.353863240 | -3081.223787207 | -3080.354090620 | -3081.392566252 |
| 6.30 | -3081.062788357 | -3080.353863480 | -3081.223777366 | -3080.354090890 | -3081.392556110 |
| 6.40 | -3081.062779861 | -3080.353863650 | -3081.223768650 | -3080.354091080 | -3081.392547152 |
| 6.50 | -3081.062772307 | -3080.353863760 | -3081.223760903 | -3080.354091210 | -3081.392539191 |
| 6.60 | -3081.062765583 | -3080.353863830 | -3081.223754021 | -3080.354091310 | -3081.392532127 |
| 6.70 | -3081.062759588 | -3080.353863880 | -3081.223747885 | -3080.354091380 | -3081.392525832 |
| 6.80 | -3081.062754229 | -3080.353863900 | -3081.223742418 | -3080.354091420 | -3081.392520239 |
| 6.90 | -3081.062749446 | -3080.353863910 | -3081.223737526 | -3080.354091460 | -3081.392515216 |
| 7.00 | -3081.062745157 | -3080.353863910 | -3081.223733153 | -3080.354091480 | -3081.392510744 |
| 7.10 | -3081.062741307 | -3080.353863900 | -3081.223729228 | -3080.354091500 | -3081.392506723 |
| 7.20 | -3081.062737847 | -3080.353863890 | -3081.223725707 | -3080.354091510 | -3081.392503127 |
| 7.30 | -3081.062734733 | -3080.353863870 | -3081.223722536 | -3080.354091510 | -3081.392499886 |
| 7.40 | -3081.062731920 | -3080.353863850 | -3081.223719683 | -3080.354091510 | -3081.392496981 |
| 7.50 | -3081.062729383 | -3080.353863820 | -3081.223717105 | -3080.354091510 | -3081.392494341 |
| 7.60 | -3081.062727084 | -3080.353863800 | -3081.223714779 | -3080.354091510 | -3081.392491976 |
| 7.70 | -3081.062725006 | -3080.353863770 | -3081.223712672 | -3080.354091510 | -3081.392489820 |
| 7.80 | -3081.062723121 | -3080.353863750 | -3081.223710761 | -3080.354091500 | -3081.392487878 |
| 7.90 | -3081.062721408 | -3080.353863720 | -3081.223709025 | -3080.354091500 | -3081.392486100 |
| 8.00 | -3081.062719849 | -3080.353863700 | -3081.223707450 | -3080.354091490 | -3081.392484502 |
| 8.10 | -3081.062718429 | -3080.353863680 | -3081.223706012 | -3080.354091490 | -3081.392483036 |
| 8.20 | -3081.062717135 | -3080.353863660 | -3081.223704705 | -3080.354091480 | -3081.392481709 |
| 8.30 | -3081.062715955 | -3080.353863640 | -3081.223703508 | -3080.354091470 | -3081.392480489 |
| 8.40 | -3081.062714872 | -3080.353863620 | -3081.223702418 | -3080.354091470 | -3081.392479379 |
| 8.50 | -3081.062713881 | -3080.353863600 | -3081.223701416 | -3080.354091460 | -3081.392478361 |
| 8.60 | -3081.062712973 | -3080.353863590 | -3081.223700502 | -3080.354091460 | -3081.392477434 |

|       |                 |                 |                 |                 |                 |
|-------|-----------------|-----------------|-----------------|-----------------|-----------------|
| 8.70  | -3081.062712140 | -3080.353863570 | -3081.223699660 | -3080.354091450 | -3081.392476577 |
| 8.80  | -3081.062711374 | -3080.353863560 | -3081.223698889 | -3080.354091450 | -3081.392475796 |
| 8.90  | -3081.062710669 | -3080.353863550 | -3081.223698177 | -3080.354091450 | -3081.392475071 |
| 9.00  | -3081.062710021 | -3080.353863540 | -3081.223697525 | -3080.354091440 | -3081.392474416 |
| 9.10  | -3081.062709423 | -3080.353863530 | -3081.223696923 | -3080.354091440 | -3081.392473803 |
| 9.20  | -3081.062708872 | -2752.054720290 | -3081.223696368 | -3080.354091440 | -2896.956191432 |
| 9.30  | -3081.062708363 | -3080.353863520 | -3081.223695855 | -3080.354091440 | -3081.392472721 |
| 9.40  | -3081.062707892 | -3080.353863510 | -3081.223695381 | -3080.354091430 | -3081.392472244 |
| 9.50  | -3081.062707457 | -3080.353863500 | -3081.223694941 | -3080.354091430 | -3081.392471794 |
| 9.60  | -3081.062707053 | -3080.353863500 | -3081.223694537 | -3080.354091430 | -3081.392471388 |
| 9.70  | -3081.062706680 | -3080.353863490 | -3081.223694160 | -3080.354091430 | -3081.392471001 |
| 9.80  | -3081.062706334 | -3080.353863490 | -3081.223693812 | -3080.354091420 | -3081.392470658 |
| 9.90  | -3081.062706012 | -3080.353863490 | -3081.223693487 | -3080.354091420 | -3081.392470329 |
| 10.00 | -3081.062705713 | -3080.353863480 | -3081.223693187 | -3080.354091420 | -3081.392470023 |
| 10.10 | -3081.062705430 | -3080.353863480 | -3081.223692906 | -3080.354091420 | -3081.392469744 |
| 10.20 | -3081.062705176 | -3080.353863480 | -3081.223692648 | -3080.354091420 | -3081.392469480 |
| 10.30 | -3081.062704936 | -3080.353863480 | -3081.223692404 | -3080.354091410 | -3081.392469239 |
| 10.40 | -3081.062704711 | -3080.353863480 | -3081.223692179 | -3080.354091410 | -3081.392469014 |
| 10.50 | -3081.062704502 | -3080.353863480 | -3081.223691967 | -3080.354091410 | -3081.392468800 |
| 10.60 | -3081.062704307 | -3080.353863480 | -3081.223691772 | -3080.354091410 | -3081.392468605 |
| 10.70 | -3081.062704124 | -3080.353863480 | -3081.223691587 | -3080.354091410 | -3081.392468418 |
| 10.80 | -3081.062703954 | -3080.353863480 | -3081.223691417 | -3080.354091410 | -3081.392468248 |
| 10.90 | -3081.062703794 | -3080.353863480 | -3081.223691256 | -3080.354091410 | -3081.392468084 |
| 11.00 | -3081.062703640 | -3080.353863480 | -3081.223691107 | -3080.354091410 | -3081.392467941 |
| 11.10 | -3081.062703505 | -3080.353863480 | -3081.223690965 | -3080.354091410 | -3081.392467792 |
| 11.20 | -3081.062703374 | -3080.353863480 | -3081.223690835 | -3080.354091410 | -3081.392467662 |
| 11.30 | -3081.062703251 | -3080.353863480 | -3081.223690710 | -3080.354091410 | -3081.392467535 |
| 11.40 | -3081.062703136 | -3080.353863480 | -3081.223690595 | -3080.354091410 | -3081.392467421 |
| 11.50 | -3081.062703028 | -3080.353863480 | -3081.223690485 | -3080.354091410 | -3081.392467309 |
| 11.60 | -3081.062702926 | -3080.353863480 | -3081.223690385 | -3080.354091410 | -3081.392467210 |
| 11.70 | -3081.062702831 | -3080.353863480 | -3081.223690287 | -3080.354091410 | -3081.392467111 |
| 11.80 | -3081.062702741 | -3080.353863480 | -3081.223690199 | -3080.354091410 | -3081.392467023 |
| 11.90 | -3081.062702656 | -3080.353863480 | -3081.223690112 | -3080.354091410 | -3081.392466935 |

Table S18: Kr-Rn electronic energies (in Hartree) calculated at CCSD(T)/aug-cc-pV4Z (CCSD(T)-4Z), CCSD(T)/aug-cc-pV5Z (CCSD(T)-5Z), and CCSD(T)/CBS levels.

| R(Å) | CCSD(T)-4Z      | SCF-4Z          | CCSD(T)-5Z      | SCF-5Z          | CBS             |
|------|-----------------|-----------------|-----------------|-----------------|-----------------|
| 3.00 | -3040.308681372 | -3039.561825110 | -3040.490195391 | -3039.562077470 | -3040.680494554 |
| 3.10 | -3040.316338965 | -3039.570982370 | -3040.497673169 | -3039.571227960 | -3040.687787477 |
| 3.20 | -3040.321946690 | -3039.577879890 | -3040.503135162 | -3039.578120620 | -3040.693099303 |
| 3.30 | -3040.326021700 | -3039.583062830 | -3040.507092527 | -3039.583300150 | -3040.696935152 |
| 3.40 | -3040.328956291 | -3039.586948230 | -3040.509932500 | -3039.587183200 | -3040.699677174 |
| 3.50 | -3040.331046955 | -3039.589854230 | -3040.511947401 | -3039.590087620 | -3040.701613474 |
| 3.60 | -3040.332516885 | -3039.592022870 | -3040.513357006 | -3039.592255200 | -3040.702960383 |
| 3.70 | -3040.333533383 | -3039.593637740 | -3040.514325776 | -3039.593869380 | -3040.703879464 |
| 3.80 | -3040.334221330 | -3039.594837770 | -3040.514976211 | -3039.595068940 | -3040.704490807 |
| 3.90 | -3040.334673411 | -3039.595727730 | -3040.515398989 | -3039.595958590 | -3040.704883015 |
| 4.00 | -3040.334958052 | -3039.596386460 | -3040.515660812 | -3039.596617130 | -3040.705121003 |
| 4.10 | -3040.335125421 | -3039.596873140 | -3040.515810438 | -3039.597103680 | -3040.705252088 |
| 4.20 | -3040.335212044 | -3039.597232050 | -3040.515883161 | -3039.597462520 | -3040.705310266 |
| 4.25 | -3040.335233629 | -3039.597374290 | -3040.515898933 | -3039.597604740 | -3040.705319951 |
| 4.26 | -3040.335236557 | -3039.597400210 | -3040.515900788 | -3039.597630650 | -3040.705320684 |
| 4.27 | -3040.335239067 | -3039.597425350 | -3040.515902240 | -3039.597655790 | -3040.705321027 |

|      |                 |                 |                 |                 |                 |
|------|-----------------|-----------------|-----------------|-----------------|-----------------|
| 4.28 | -3040.335241176 | -3039.597449730 | -3040.515903314 | -3039.597680160 | -3040.705321022 |
| 4.29 | -3040.335242902 | -3039.597473360 | -3040.515904029 | -3039.597703800 | -3040.705320669 |
| 4.30 | -3040.335244260 | -3039.597496290 | -3040.515904397 | -3039.597726720 | -3040.705320006 |
| 4.31 | -3040.335245266 | -3039.597518510 | -3040.515904437 | -3039.597748940 | -3040.705319031 |
| 4.32 | -3040.335245937 | -3039.597540070 | -3040.515904162 | -3039.597770490 | -3040.705317770 |
| 4.33 | -3040.335246286 | -3039.597560960 | -3040.515903586 | -3039.597791380 | -3040.705316223 |
| 4.34 | -3040.335246329 | -3039.597581230 | -3040.515902722 | -3039.597811650 | -3040.705314407 |
| 4.35 | -3040.335246078 | -3039.597600870 | -3040.515901584 | -3039.597831290 | -3040.705312340 |
| 4.36 | -3040.335245547 | -3039.597619930 | -3040.515900179 | -3039.597850340 | -3040.705310023 |
| 4.40 | -3040.335240877 | -3039.597690510 | -3040.515892220 | -3039.597920910 | -3040.705298618 |
| 4.50 | -3040.335215172 | -3039.597833040 | -3040.515859347 | -3039.598063430 | -3040.705258231 |
| 4.60 | -3040.335176396 | -3039.597937490 | -3040.515814612 | -3039.598167870 | -3040.705207248 |
| 4.70 | -3040.335130853 | -3039.598013930 | -3040.515764054 | -3039.598244290 | -3040.705151440 |
| 4.80 | -3040.335082759 | -3039.598069800 | -3040.515711692 | -3039.598300150 | -3040.705094606 |
| 4.90 | -3040.335034845 | -3039.598110570 | -3040.515660100 | -3039.598340910 | -3040.705039161 |
| 5.00 | -3040.334988806 | -3039.598140280 | -3040.515610881 | -3039.598370630 | -3040.704986599 |
| 5.10 | -3040.334945616 | -3039.598161890 | -3040.515564956 | -3039.598392270 | -3040.704937788 |
| 5.20 | -3040.334905773 | -3039.598177600 | -3040.515522755 | -3039.598408020 | -3040.704893091 |
| 5.30 | -3040.334869454 | -3039.598188980 | -3040.515484413 | -3039.598419450 | -3040.704852598 |
| 5.40 | -3040.334836638 | -3039.598197220 | -3040.515449862 | -3039.598427750 | -3040.704816195 |
| 5.50 | -3040.334807170 | -3039.598203160 | -3040.515418924 | -3039.598433770 | -3040.704783669 |
| 5.60 | -3040.334780823 | -3039.598207440 | -3040.515391339 | -3039.598438120 | -3040.704754744 |
| 5.70 | -3040.334757346 | -3039.598210520 | -3040.515366824 | -3039.598441260 | -3040.704729107 |
| 5.80 | -3040.334736473 | -3039.598212720 | -3040.515345073 | -3039.598443520 | -3040.704706402 |
| 5.90 | -3040.334717940 | -3039.598214300 | -3040.515325795 | -3039.598445140 | -3040.704686319 |
| 6.00 | -3040.334701498 | -3039.598215420 | -3040.515308759 | -3039.598446310 | -3040.704668633 |
| 6.10 | -3040.334686912 | -3039.598216210 | -3040.515293647 | -3039.598447140 | -3040.704652945 |
| 6.20 | -3040.334673971 | -3039.598216770 | -3040.515280298 | -3039.598447740 | -3040.704639146 |
| 6.30 | -3040.334662483 | -3039.598217160 | -3040.515268450 | -3039.598448170 | -3040.704626898 |
| 6.40 | -3040.334652276 | -3039.598217430 | -3040.515257941 | -3039.598448470 | -3040.704616056 |
| 6.50 | -3040.334643197 | -3039.598217620 | -3040.515248608 | -3039.598448690 | -3040.704606438 |
| 6.60 | -3040.334635112 | -3039.598217750 | -3040.515240307 | -3039.598448850 | -3040.704597895 |
| 6.70 | -3040.334627902 | -3039.598217830 | -3040.515232917 | -3039.598448960 | -3040.704590299 |
| 6.80 | -3040.334621464 | -3039.598217890 | -3040.515226324 | -3039.598449040 | -3040.704583533 |
| 6.90 | -3040.334615706 | -3039.598217920 | -3040.515220434 | -3039.598449100 | -3040.704577486 |
| 7.00 | -3040.334610548 | -3039.598217940 | -3040.515215160 | -3039.598449140 | -3040.704572081 |
| 7.10 | -3040.334605912 | -3039.598217940 | -3040.515210438 | -3039.598449160 | -3040.704567255 |
| 7.20 | -3040.334601754 | -3039.598217940 | -3040.515206194 | -3039.598449180 | -3040.704562911 |
| 7.30 | -3040.334598010 | -3039.598217930 | -3040.515202380 | -3039.598449200 | -3040.704559006 |
| 7.40 | -3040.334594644 | -3039.598217920 | -3040.515198945 | -3039.598449200 | -3040.704555493 |
| 7.50 | -3040.334591596 | -3039.598217900 | -3040.515195845 | -3039.598449210 | -3040.704552322 |
| 7.60 | -3040.334588840 | -3039.598217880 | -3040.515193045 | -3039.598449210 | -3040.704549464 |
| 7.70 | -3040.334586344 | -3039.598217870 | -3040.515190512 | -3039.598449210 | -3040.704546887 |
| 7.80 | -3040.334584080 | -3039.598217850 | -3040.515188215 | -3039.598449200 | -3040.704544550 |
| 7.90 | -3040.334582023 | -3039.598217830 | -3040.515186130 | -3039.598449200 | -3040.704542424 |
| 8.00 | -3040.334580153 | -3039.598217810 | -3040.515184235 | -3039.598449190 | -3040.704540497 |
| 8.10 | -3040.334578449 | -3039.598217790 | -3040.515184232 | -3039.598449190 | -3040.704542268 |
| 8.20 | -3040.334576895 | -3039.598217770 | -3040.515182509 | -3039.598449180 | -3040.704540363 |
| 8.30 | -3040.334575475 | -3039.598217750 | -3040.515180937 | -3039.598449180 | -3040.704538619 |
| 8.40 | -3040.334574178 | -3039.598217740 | -3040.515179502 | -3039.598449170 | -3040.704537040 |
| 8.50 | -3040.334572990 | -3039.598217720 | -3040.515178191 | -3039.598449170 | -3040.704535587 |
| 8.60 | -3040.334571901 | -3039.598217710 | -3040.515176990 | -3039.598449160 | -3040.704534270 |
| 8.70 | -3040.334570902 | -3039.598217690 | -3040.515175891 | -3039.598449160 | -3040.704533054 |
| 8.80 | -3040.334569984 | -3039.598217680 | -3040.515174883 | -3039.598449150 | -3040.704531951 |

|       |                 |                 |                 |                 |                 |
|-------|-----------------|-----------------|-----------------|-----------------|-----------------|
| 9.00  | -3040.334568363 | -3039.598217670 | -3040.515172320 | -3039.598449140 | -3040.704528400 |
| 9.10  | -3040.334567647 | -3039.598217660 | -3040.515171600 | -3039.598449140 | -3040.704527671 |
| 9.20  | -3040.334566987 | -3039.598217650 | -3040.515170935 | -3039.598449130 | -3040.704527001 |
| 10.00 | -3040.334563205 | -3039.598217600 | -3040.515167127 | -3039.598449110 | -3040.704523149 |
| 10.10 | -3040.334562873 | -3039.598217600 | -3040.515166795 | -3039.598449110 | -3040.704522816 |
| 10.20 | -3040.334562563 | -3039.598217590 | -3040.515166484 | -3039.598449110 | -3040.704522497 |
| 11.00 | -3040.334560731 | -3039.598217580 | -3040.515164641 | -3039.598449100 | -3040.704520645 |
| 11.10 | -3040.334560564 | -3039.598217580 | -3040.515164475 | -3039.598449100 | -3040.704520480 |
| 12.00 | -3040.334559454 | -3039.598217580 | -3040.515163361 | -3039.598449100 | -3040.704519360 |

Table S19: Xe<sub>2</sub> electronic energies (in Hartree) calculated at CCSD(T)/aug-cc-pV4Z (CCSD(T)-4Z), CCSD(T)/aug-cc-pV5Z (CCSD(T)-5Z), and CCSD(T)/CBS levels.

| R(Å) | CCSD(T)-4Z     | SCF-4Z         | CCSD(T)-5Z     | SCF-5Z         | CBS            |
|------|----------------|----------------|----------------|----------------|----------------|
| 2.00 | -656.681306427 | -655.876774026 | -656.840389778 | -655.878248229 | -657.006468704 |
| 2.10 | -656.841347336 | -656.042330974 | -656.998782822 | -656.043292284 | -657.163420980 |
| 2.20 | -656.963472172 | -656.169798741 | -657.119630350 | -656.170450495 | -657.283102288 |
| 2.30 | -657.056976784 | -656.268277482 | -657.212119737 | -656.268742381 | -657.374631495 |
| 2.40 | -657.128659507 | -656.344481538 | -657.282980897 | -656.344832565 | -657.444694658 |
| 2.50 | -657.183590054 | -656.403457905 | -657.337234334 | -656.403737458 | -657.498277840 |
| 2.60 | -657.225610533 | -656.449059700 | -657.378687195 | -656.449292206 | -657.539161597 |
| 2.70 | -657.257667019 | -656.484262140 | -657.410262512 | -656.484461631 | -657.570250628 |
| 2.80 | -657.282035449 | -656.511379162 | -657.434221238 | -656.511553895 | -657.593793410 |
| 2.90 | -657.300481195 | -656.532217249 | -657.452318452 | -656.532372510 | -657.611535891 |
| 3.00 | -657.314375625 | -656.548188545 | -657.465917764 | -656.548328196 | -657.624834340 |
| 3.10 | -657.324783894 | -656.560396503 | -657.476078003 | -656.560523717 | -657.634741339 |
| 3.20 | -657.332532058 | -656.569702093 | -657.483619548 | -656.569819646 | -657.642071529 |
| 3.30 | -657.338259292 | -656.576775653 | -657.489176364 | -656.576885983 | -657.647453604 |
| 3.40 | -657.342458653 | -656.582137746 | -657.493236582 | -656.582242931 | -657.651370727 |
| 3.50 | -657.345509102 | -656.586191470 | -657.496174674 | -656.586293188 | -657.654192884 |
| 3.60 | -657.347700712 | -656.589247997 | -657.498276499 | -656.589347517 | -657.656201742 |
| 3.70 | -657.349254485 | -656.591546758 | -657.499759303 | -656.591644978 | -657.657610818 |
| 3.80 | -657.350337998 | -656.593271374 | -657.500787258 | -656.593368879 | -657.658580883 |
| 3.90 | -657.351077631 | -656.594562190 | -657.501483758 | -656.594659335 | -657.659232332 |
| 4.00 | -657.351568151 | -656.595526130 | -657.501940967 | -656.595623117 | -657.659654680 |
| 4.10 | -657.351880222 | -656.596244404 | -657.502227418 | -656.596341332 | -657.659914285 |
| 4.20 | -657.352066094 | -656.596778497 | -657.502393545 | -656.596875418 | -657.660059700 |
| 4.30 | -657.352164219 | -656.597174837 | -657.502476345 | -656.597271772 | -657.660126413 |
| 4.31 | -657.352170363 | -656.597208324 | -657.502481151 | -656.597305261 | -657.660129814 |
| 4.32 | -657.352175938 | -656.597240819 | -657.502485424 | -656.597337758 | -657.660132719 |
| 4.33 | -657.352180963 | -656.597272352 | -657.502489176 | -656.597369294 | -657.660135134 |
| 4.34 | -657.352185455 | -656.597302950 | -657.502492425 | -656.597399894 | -657.660137080 |
| 4.35 | -657.352189452 | -656.597332641 | -657.502495223 | -656.597429588 | -657.660138617 |
| 4.36 | -657.352192975 | -656.597361451 | -657.502497550 | -656.597458400 | -657.660139689 |
| 4.37 | -657.352196030 | -656.597389405 | -657.502499434 | -656.597486357 | -657.660140341 |
| 4.38 | -657.352198638 | -656.597416528 | -657.502500920 | -656.597513484 | -657.660140648 |
| 4.39 | -657.352200810 | -656.597442846 | -657.502501998 | -656.597539804 | -657.660140577 |
| 4.40 | -657.352202590 | -656.597468380 | -657.502502684 | -656.597565342 | -657.660140112 |
| 4.41 | -657.352203967 | -656.597493154 | -657.502503020 | -656.597590119 | -657.660139355 |
| 4.42 | -657.352204981 | -656.597685382 | -657.502502988 | -656.597614159 | -657.660232712 |
| 4.43 | -657.352205635 | -656.597666522 | -657.502502639 | -656.597637483 | -657.660207613 |
| 4.44 | -657.352205942 | -656.597647080 | -657.502501957 | -656.597660111 | -657.660182259 |
| 4.45 | -657.352205922 | -656.597627039 | -657.502500971 | -656.597682064 | -657.660156668 |
| 4.46 | -657.352205580 | -656.597606380 | -657.502499683 | -656.597703362 | -657.660130815 |



|      |                |                |                |                |                |
|------|----------------|----------------|----------------|----------------|----------------|
| 4.47 | -657.352204952 | -656.597585086 | -657.502498136 | -656.597724024 | -657.660104734 |
| 4.48 | -657.352204026 | -656.597563136 | -657.502496309 | -656.597744069 | -657.660078369 |
| 4.49 | -657.352202835 | -656.597540511 | -657.502494219 | -656.597763514 | -657.660051702 |
| 4.50 | -657.352201377 | -656.597517191 | -657.502491899 | -656.597782378 | -657.660024779 |
| 4.60 | -657.352175009 | -656.597845515 | -657.502457749 | -656.597942547 | -657.660076932 |
| 4.70 | -657.352133613 | -656.597963488 | -657.502409881 | -656.598060550 | -657.660022256 |
| 4.80 | -657.352084166 | -656.598050268 | -657.502355001 | -656.598147346 | -657.659961667 |
| 4.90 | -657.352031438 | -656.598114013 | -657.502297604 | -656.598211089 | -657.659899373 |
| 5.00 | -657.351978561 | -656.598160777 | -657.502240645 | -656.598257833 | -657.659838142 |
| 5.10 | -657.351927438 | -656.598195042 | -657.502185990 | -656.598292064 | -657.659779801 |
| 5.20 | -657.351879260 | -656.598220115 | -657.502134725 | -656.598317097 | -657.659725319 |
| 5.30 | -657.351834646 | -656.598238436 | -657.502087449 | -656.598335380 | -657.659675272 |
| 5.40 | -657.351793843 | -656.598251798 | -657.502044295 | -656.598348718 | -657.659629664 |
| 5.50 | -657.351756858 | -656.598261524 | -657.502005287 | -656.598358436 | -657.659588539 |
| 5.60 | -657.351723556 | -656.598268586 | -657.501970251 | -656.598365508 | -657.659551678 |
| 5.70 | -657.351693708 | -656.598273698 | -657.501938931 | -656.598370650 | -657.659518797 |
| 5.80 | -657.351667044 | -656.598277388 | -657.501911033 | -656.598374385 | -657.659489577 |
| 5.90 | -657.351643283 | -656.598280042 | -657.501886235 | -656.598377094 | -657.659463661 |
| 6.00 | -657.351622137 | -656.598281947 | -657.501864231 | -656.598379057 | -657.659440725 |
| 6.10 | -657.351603333 | -656.598283310 | -657.501844717 | -656.598380479 | -657.659420432 |
| 6.20 | -657.351586620 | -656.598284285 | -657.501827413 | -656.598381508 | -657.659402479 |
| 6.30 | -657.351571759 | -656.598284982 | -657.501812065 | -656.598382252 | -657.659386593 |
| 6.40 | -657.351558542 | -656.598285480 | -657.501798439 | -656.598382789 | -657.659372517 |
| 6.50 | -657.351546778 | -656.598285838 | -657.501786331 | -656.598383176 | -657.659360031 |
| 6.60 | -657.351536297 | -656.598286096 | -657.501775559 | -656.598383456 | -657.659348941 |
| 6.70 | -657.351526949 | -656.598286282 | -657.501765963 | -656.598383658 | -657.659339076 |
| 6.80 | -657.351518601 | -656.598286417 | -657.501757403 | -656.598383803 | -657.659330287 |
| 6.90 | -657.351511136 | -656.598286514 | -657.501749753 | -656.598383907 | -657.659322440 |
| 7.00 | -657.351504451 | -656.598286584 | -657.501742910 | -656.598383982 | -657.659315429 |
| 7.10 | -657.351498457 | -656.598286634 | -657.501736778 | -656.598384036 | -657.659309149 |
| 7.20 | -657.351493071 | -656.598286667 | -657.501731274 | -656.598384074 | -657.659303518 |
| 7.30 | -657.351488228 | -656.598286690 | -657.501726327 | -656.598384102 | -657.659298459 |
| 7.40 | -657.351483864 | -656.598286702 | -657.501721873 | -656.598384122 | -657.659293907 |
| 7.50 | -657.351479925 | -656.598286708 | -657.501717858 | -656.598384135 | -657.659289808 |
| 7.60 | -657.351476367 | -656.598286708 | -657.501714232 | -656.598384145 | -657.659286105 |
| 7.70 | -657.351473146 | -656.598286703 | -657.501710954 | -656.598384152 | -657.659282760 |
| 7.80 | -657.351470227 | -656.598286695 | -657.501707985 | -656.598384157 | -657.659279732 |
| 7.90 | -657.351467577 | -656.598286684 | -657.501705293 | -656.598384160 | -657.659276988 |
| 8.00 | -657.351465169 | -656.598286672 | -657.501702849 | -656.598384162 | -657.659274498 |
| 8.10 | -657.351462976 | -656.598286658 | -657.501700626 | -656.598384164 | -657.659272234 |
| 8.20 | -657.351460978 | -656.598286643 | -657.501698602 | -656.598384165 | -657.659270175 |
| 8.30 | -657.351459154 | -656.598286629 | -657.501696757 | -656.598384165 | -657.659268298 |
| 8.40 | -657.351457488 | -656.598286613 | -657.501695073 | -656.598384166 | -657.659266586 |
| 8.50 | -657.351455959 | -656.598286599 | -657.501693532 | -656.598384166 | -657.659265026 |
| 8.60 | -657.351454567 | -656.598286584 | -657.501692123 | -656.598384166 | -657.659263590 |
| 8.70 | -657.351453283 | -656.598286570 | -657.501690831 | -656.598384166 | -657.659262281 |
| 8.80 | -657.351452108 | -656.598286556 | -657.501689645 | -656.598384164 | -657.659261078 |
| 8.90 | -657.351451028 | -656.598286544 | -657.501688556 | -656.598384164 | -657.659259973 |
| 9.00 | -657.351450035 | -656.598286532 | -657.501687554 | -656.598384164 | -657.659258954 |
| 9.10 | -657.351449124 | -656.598286520 | -657.501686631 | -656.598384164 | -657.659258011 |
| 9.20 | -657.351448275 | -656.598286510 | -657.501685781 | -656.598384164 | -657.659257155 |
| 9.30 | -657.351447496 | -656.598286500 | -657.501684996 | -656.598384164 | -657.659256357 |
| 9.40 | -657.351446777 | -328.299143246 | -657.501684271 | -656.598384166 | -657.659254941 |
| 9.50 | -657.351446111 | -656.598286484 | -657.501683600 | -656.598384164 | -657.659254313 |

|       |                |                |                |                |                |
|-------|----------------|----------------|----------------|----------------|----------------|
| 9.60  | -657.351445495 | -656.598286476 | -657.501682980 | -656.598384164 | -657.659253731 |
| 9.70  | -657.351444924 | -656.598286470 | -657.501682405 | -656.598384164 | -657.659253191 |
| 9.80  | -657.351444394 | -656.598286464 | -657.501681872 | -656.598384164 | -657.659252691 |
| 9.90  | -657.351443904 | -656.598286459 | -657.501681378 | -656.598384164 | -657.659252227 |
| 10.00 | -657.351443448 | -656.598286454 | -657.501680919 | -656.598384164 | -657.659251794 |
| 10.10 | -657.351443024 | -656.598286450 | -657.501680493 | -656.598384164 | -657.659247386 |

Table S20: Xe-Rn electronic energies (in Hartree) calculated at CCSD(T)/aug-cc-pV4Z (CCSD(T)-4Z), CCSD(T)/aug-cc-pV5Z (CCSD(T)-5Z), and CCSD(T)/CBS levels.

| R(Å) | CCSD(T)-4Z      | SCF-4Z          | CCSD(T)-5Z      | SCF-5Z          | CBS             |
|------|-----------------|-----------------|-----------------|-----------------|-----------------|
| 3.50 | -616.6157693017 | -615.8280558450 | -616.7073668405 | -615.8281689940 | -616.8034056100 |
| 3.60 | -616.6184245007 | -615.8316698250 | -616.7099108280 | -615.8317794060 | -616.8058349210 |
| 3.70 | -616.6203291015 | -615.8344049580 | -616.7117257921 | -615.8345121300 | -616.8075571934 |
| 3.80 | -616.6216755935 | -615.8364703090 | -616.7130006884 | -615.8365759260 | -616.8087578465 |
| 3.90 | -616.6226100883 | -615.8380264780 | -616.7138784735 | -615.8381311640 | -616.8095766558 |
| 4.00 | -616.6232429560 | -615.8391965080 | -616.7144668488 | -615.8393006490 | -616.8101186568 |
| 4.10 | -616.6236571314 | -615.8400744090 | -616.7148464289 | -615.8401782450 | -616.8104621115 |
| 4.20 | -616.6239145895 | -615.8407318140 | -616.7150772089 | -615.8408354720 | -616.8106650014 |
| 4.30 | -616.6240613257 | -615.8412231610 | -616.7152033834 | -615.8413267350 | -616.8107696502 |
| 4.40 | -616.6241312278 | -615.8415897150 | -616.7152574715 | -615.8416932450 | -616.8108071712 |
| 4.42 | -616.6241382962 | -615.8416509460 | -616.7152618266 | -615.8417544720 | -616.8108086819 |
| 4.43 | -616.6241411095 | -615.8416802320 | -616.7152633321 | -615.8417837570 | -616.8108088158 |
| 4.44 | -616.6241434674 | -615.8417086660 | -616.7152644173 | -615.8418121900 | -616.8108085663 |
| 4.45 | -616.6241453875 | -615.8417362710 | -616.7152650981 | -615.8418397950 | -616.8108079469 |
| 4.46 | -616.6241468889 | -615.8417630730 | -616.7152653886 | -615.8418665940 | -616.8108069687 |
| 4.47 | -616.6241479887 | -615.8417890930 | -616.7152653079 | -615.8418926140 | -616.8108056492 |
| 4.48 | -616.6241487038 | -615.8418143540 | -616.7152648719 | -615.8419178740 | -616.8108040062 |
| 4.49 | -616.6241490499 | -615.8418388770 | -616.7152640935 | -615.8419423980 | -616.8108020474 |
| 4.50 | -616.6241490431 | -615.8418626850 | -616.7152629894 | -615.8419662050 | -616.8107997926 |
| 4.51 | -616.6241486991 | -615.8418857970 | -616.7152615731 | -615.8419893170 | -616.8107972513 |
| 4.52 | -616.6241480315 | -615.8419082330 | -616.7152598600 | -615.8420117530 | -616.8107944414 |
| 4.53 | -616.6241470545 | -615.8419300130 | -616.7152578646 | -615.8420335330 | -616.8107913774 |
| 4.54 | -616.6241457833 | -615.8419511550 | -616.7152555956 | -615.8420546760 | -616.8107880610 |
| 4.55 | -616.6241442310 | -615.8419716780 | -616.7152530739 | -615.8420751900 | -616.8107845273 |
| 4.56 | -616.6241424095 | -615.8419916000 | -616.7152502994 | -615.8420951130 | -616.8107807523 |
| 4.57 | -616.6241403321 | -615.8420109380 | -616.7152472914 | -615.8421144520 | -616.8107767675 |
| 4.60 | -616.6241326783 | -615.8420656120 | -616.7152369756 | -615.8421691290 | -616.8107636569 |
| 4.70 | -616.6240949196 | -615.8422162220 | -616.7151914871 | -615.8423197330 | -616.8107100619 |
| 4.80 | -616.6240447892 | -615.8423278270 | -616.7151350485 | -615.8424313530 | -616.8106469964 |
| 4.90 | -616.6239885065 | -615.8424104080 | -616.7150735227 | -615.8425139400 | -616.8105799664 |
| 5.00 | -616.6239302707 | -615.8424714290 | -616.7150108296 | -615.8425749570 | -616.8105125988 |
| 5.10 | -616.6238728551 | -615.8425164620 | -616.7149495357 | -615.8426199750 | -616.8104472444 |
| 5.20 | -616.6238179239 | -615.8425496540 | -616.7148912414 | -615.8426531450 | -616.8103854340 |
| 5.30 | -616.6237664887 | -615.8425740890 | -616.7148368478 | -615.8426775520 | -616.8103279521 |
| 5.40 | -616.6237190398 | -615.8425920550 | -616.7147867836 | -615.8426954930 | -616.8102751582 |
| 5.50 | -616.6236757383 | -615.8426052460 | -616.7147411915 | -615.8427086610 | -616.8102271757 |
| 5.60 | -616.6236365319 | -615.8426149150 | -616.7146999772 | -615.8427183190 | -616.8101838609 |
| 5.70 | -616.6236012353 | -615.8426219900 | -616.7146629377 | -615.8427253930 | -616.8101449934 |
| 5.80 | -616.6235695900 | -615.8426271560 | -616.7146298019 | -615.8427305690 | -616.8101102881 |
| 5.90 | -616.6235413023 | -615.8426309190 | -616.7146002410 | -615.8427343520 | -616.8100793802 |
| 6.00 | -616.6235160675 | -615.8426336540 | -616.7145739353 | -615.8427371150 | -616.8100519353 |
| 6.10 | -616.6234935787 | -615.8426356380 | -616.7145505443 | -615.8427391300 | -616.8100275802 |
| 6.20 | -616.6234735458 | -615.8426370720 | -616.7145297690 | -615.8427406000 | -616.8100060058 |

|       |                 |                 |                 |                 |                 |
|-------|-----------------|-----------------|-----------------|-----------------|-----------------|
| 6.30  | -616.6234557174 | -615.8426381070 | -616.7145113172 | -615.8427416700 | -616.8099868803 |
| 6.40  | -616.6234398422 | -615.8426388530 | -616.7144949170 | -615.8427424490 | -616.8099699107 |
| 6.50  | -616.6234257000 | -615.8426393900 | -616.7144803614 | -615.8427430160 | -616.8099549044 |
| 6.60  | -616.6234130919 | -615.8426397770 | -616.7144673910 | -615.8427434280 | -616.8099415399 |
| 6.70  | -616.6234018416 | -615.8426400550 | -616.7144558410 | -615.8427437270 | -616.8099296638 |
| 6.80  | -616.6233917914 | -615.8426402550 | -616.7144455237 | -615.8427439440 | -616.8099190566 |
| 6.90  | -616.6233828131 | -615.8426404000 | -616.7144363122 | -615.8427441010 | -616.8099095936 |
| 7.00  | -616.6233747631 | -615.8426405040 | -616.7144280707 | -615.8427442150 | -616.8099011457 |
| 7.10  | -616.6233675439 | -615.8426405800 | -616.7144206869 | -615.8427442970 | -616.8098935857 |
| 7.20  | -616.6233610600 | -615.8426406340 | -616.7144140619 | -615.8427443570 | -616.8098868093 |
| 7.30  | -616.6233552282 | -615.8426406720 | -616.7144081079 | -615.8427443990 | -616.8098807249 |
| 7.40  | -616.6233499751 | -615.8426406980 | -616.7144027494 | -615.8427444300 | -616.8098752531 |
| 7.50  | -616.6233452363 | -615.8426407160 | -616.7143979207 | -615.8427444520 | -616.8098703278 |
| 7.60  | -616.6233409547 | -615.8426407270 | -616.7143935622 | -615.8427444670 | -616.8098658864 |
| 7.70  | -616.6233370807 | -615.8426407320 | -616.7143896223 | -615.8427444780 | -616.8098618739 |
| 7.80  | -616.6233335704 | -615.8426407340 | -616.7143860551 | -615.8427444860 | -616.8098582437 |
| 7.90  | -616.6233303849 | -615.8426407320 | -616.7143828215 | -615.8427444910 | -616.8098549557 |
| 8.00  | -616.6233274900 | -615.8426407270 | -616.7143798859 | -615.8427444950 | -616.8098519723 |
| 8.10  | -616.6233248556 | -615.8426407210 | -616.7143772169 | -615.8427444980 | -616.8098492619 |
| 8.20  | -616.6233224554 | -615.8426407130 | -616.7143747873 | -615.8427444990 | -616.8098467965 |
| 8.60  | -616.6233147578 | -615.8426406760 | -616.7143670100 | -615.8427445030 | -616.8098389124 |
| 9.00  | -616.6233093210 | -615.8426406760 | -616.7143615316 | -615.8427445030 | -616.8098333906 |
| 9.40  | -616.6233054123 | -615.8426406050 | -616.7143575997 | -615.8427445030 | -616.8098293943 |
| 9.80  | -616.6233025577 | -615.8426405790 | -616.7143547308 | -615.8427445010 | -616.8098264971 |
| 10.20 | -616.6233004429 | -615.8426405610 | -616.7143526070 | -615.8427445000 | -616.8098243542 |
| 10.60 | -616.6232988559 | -615.8426405500 | -616.7143510142 | -615.8427444990 | -616.8098227497 |
| 11.00 | -616.6232976509 | -615.8426405430 | -616.7143498055 | -615.8427444990 | -616.8098215331 |
| 11.40 | -616.6232963452 | -615.8426405400 | -616.7143488781 | -615.8427444980 | -616.8098210015 |
| 11.80 | -616.6232971585 | -615.8426405380 | -616.7143481592 | -615.8427444970 | -616.8098186746 |
| 12.20 | -616.6232954492 | -615.8426405370 | -616.7143475970 | -615.8427444970 | -616.8098193152 |
| 12.60 | -616.6232950053 | -615.8426405370 | -616.7143471533 | -615.8427444970 | -616.8098188718 |
| 13.00 | -616.6232946529 | -615.8426405370 | -616.7143468004 | -615.8427444970 | -616.8098185183 |
| 13.40 | -616.6232943706 | -615.8426405370 | -616.7143465175 | -615.8427444970 | -616.8098182349 |
| 13.80 | -616.6232941426 | -615.8426405370 | -616.7143462894 | -615.8427444970 | -616.8098180064 |
| 14.20 | -616.6232939575 | -615.8426405370 | -616.7143461040 | -615.8427444970 | -616.8098178209 |
| 14.60 | -616.6232938061 | -615.8426405370 | -616.7143459524 | -615.8427444970 | -616.8098176692 |

Table S21:  $\text{Rn}_2$  electronic energies (in Hartree) calculated at CCSD(T)/aug-cc-pV4Z (CCSD(T)-4Z), CCSD(T)/aug-cc-pV5Z (CCSD(T)-5Z), and CCSD(T)/CBS levels.

| R(Å) | CCSD(T)-4Z      | SCF-4Z          | CCSD(T)-5Z      | SCF-5Z          | CBS             |
|------|-----------------|-----------------|-----------------|-----------------|-----------------|
| 3.50 | -575.8857722961 | -575.0695621520 | -576.0759220961 | -575.0696834490 | -576.2753553818 |
| 3.60 | -575.8889615042 | -575.0738099790 | -576.0789778568 | -575.0739259790 | -576.2782741079 |
| 3.70 | -575.8912709406 | -575.0770416590 | -576.0811783182 | -575.0771537670 | -576.2803624214 |
| 3.80 | -575.8929216941 | -575.0794950710 | -576.0827405056 | -575.0796045570 | -576.2818331599 |
| 3.90 | -575.8940824193 | -575.0813540520 | -576.0838298415 | -575.0814616500 | -576.2828486562 |
| 4.00 | -575.8948812892 | -575.0827596910 | -576.0845716740 | -575.0828660730 | -576.2835313293 |
| 4.10 | -575.8954152286 | -575.0838204610 | -576.0850606169 | -575.0839260960 | -576.2839734825 |
| 4.20 | -575.8957572166 | -575.0846194600 | -576.0853675138 | -575.0847246510 | -576.2842438119 |
| 4.30 | -575.8959618499 | -575.0852201750 | -576.0855451309 | -575.0853251200 | -576.2843932224 |
| 4.40 | -575.8960697547 | -575.0856710050 | -576.0856323049 | -575.0857758280 | -576.2844587146 |
| 4.47 | -575.8961041574 | -575.0859175220 | -576.0856550983 | -575.0860222810 | -576.2844693637 |
| 4.48 | -575.8961068971 | -575.0859488340 | -576.0856563471 | -575.0860535860 | -576.2844690521 |
| 4.49 | -575.8961091468 | -575.0859792510 | -576.0856571546 | -575.0860839960 | -576.2844683505 |

---

|       |                 |                 |                 |                 |                 |
|-------|-----------------|-----------------|-----------------|-----------------|-----------------|
| 4.50  | -575.8961108808 | -575.0860087980 | -576.0856575333 | -575.0861135370 | -576.2844673107 |
| 4.51  | -575.8961122259 | -575.0860374980 | -576.0856575003 | -575.0861422310 | -576.2844658351 |
| 4.52  | -575.8961131477 | -575.0860653770 | -576.0856570680 | -575.0861701050 | -576.2844639849 |
| 4.53  | -575.8961136581 | -575.0860924570 | -576.0856562729 | -575.0861971790 | -576.2844618234 |
| 4.54  | -575.8961137764 | -575.0861187600 | -576.0856551216 | -575.0862234780 | -576.2844593423 |
| 4.55  | -575.8961135209 | -575.0861443090 | -576.0856536220 | -575.0862490220 | -576.2844565404 |
| 4.56  | -575.8961129054 | -575.0861691240 | -576.0856517983 | -575.0862738340 | -576.2844534505 |
| 4.57  | -575.8961119491 | -575.0861932270 | -576.0856496616 | -575.0862979330 | -576.2844500777 |
| 4.58  | -575.8961106638 | -575.0862166370 | -576.0856472311 | -575.0863213390 | -576.2844464479 |
| 4.59  | -575.8961090595 | -575.0862393740 | -576.0856445092 | -575.0863440730 | -576.2844425552 |
| 4.60  | -575.8961072331 | -575.0862614570 | -576.0856415166 | -575.0863661520 | -576.2844383412 |
| 4.70  | -575.8960745175 | -575.0864501350 | -576.0855991992 | -575.0865548070 | -576.2843859629 |
| 4.80  | -575.8960241323 | -575.0865908140 | -576.0855411817 | -575.0866954780 | -576.2843199420 |
| 4.90  | -575.8959641331 | -575.0866955460 | -576.0854749092 | -575.0868002100 | -576.2842470878 |
| 5.00  | -575.8958999363 | -575.0867733980 | -576.0854055558 | -575.0868780710 | -576.2841723191 |
| 5.10  | -575.8958352920 | -575.0868312050 | -576.0853364500 | -575.0869358760 | -576.2840985337 |
| 5.20  | -575.8957725239 | -575.0868740680 | -576.0852698229 | -575.0869787330 | -576.2840278611 |
| 5.30  | -575.8957130830 | -575.0869057940 | -576.0852070045 | -575.0870104680 | -576.2839614941 |
| 5.40  | -575.8956578137 | -575.0869292870 | -576.0851486877 | -575.0870339380 | -576.2838999929 |
| 5.50  | -575.8956070441 | -575.0869466500 | -576.0850951796 | -575.0870512740 | -576.2838436266 |
| 5.60  | -575.8955608324 | -575.0869594690 | -576.0850465279 | -575.0870640660 | -576.2837924300 |
| 5.70  | -575.8955190903 | -575.0869689230 | -576.0850025754 | -575.0870734930 | -576.2837461736 |
| 5.80  | -575.8954815108 | -575.0869758860 | -576.0849630625 | -575.0870804340 | -576.2837046447 |
| 5.90  | -575.8954478148 | -575.0869810070 | -576.0849276913 | -575.0870855390 | -576.2836675249 |
| 6.00  | -575.8954176774 | -575.0869847650 | -576.0848961216 | -575.0870892900 | -576.2836344563 |
| 6.10  | -575.8953907742 | -575.0869875190 | -576.0848961216 | -575.0870892900 | -576.2836642298 |
| 6.50  | -575.8953093167 | -575.0869928330 | -576.0847831996 | -575.0870974190 | -576.2835167144 |
| 7.00  | -575.8952479707 | -575.0869944460 | -576.0847199513 | -575.0870991240 | -576.2834514186 |
| 7.50  | -575.8952124007 | -575.0869947650 | -576.0846834990 | -575.0870994700 | -576.2834140254 |
| 8.00  | -575.8951910463 | -575.0869948250 | -576.0846617197 | -575.0870995360 | -576.2833917969 |
| 8.50  | -575.8951777586 | -575.0869948180 | -576.0846482317 | -575.0870995480 | -576.2833780881 |
| 9.00  | -575.8951692176 | -575.0869947910 | -576.0846395965 | -575.0870995500 | -576.2833693379 |
| 10.00 | -575.8951597343 | -575.0869947420 | -576.0846300529 | -575.0870995480 | -576.2833597047 |
| 11.00 | -575.8951552223 | -575.0869947170 | -576.0846255103 | -575.0870995440 | -576.2833551181 |
| 12.00 | -575.8951528993 | -575.0869947100 | -576.0846231783 | -574.5119755020 | -576.6064536460 |
| 13.00 | -575.8951516318 | -575.0869947080 | -576.0846219089 | -574.5107452270 | -576.6071435337 |
| 14.00 | -575.8951509047 | -575.0869947080 | -576.0846211799 | -574.5082214470 | -576.6085606457 |
| 15.00 | -575.8951504696 | -575.0869947080 | -576.0846207443 | -574.5082202910 | -576.6085608589 |
| 16.00 | -575.8951501998 | -575.0869947080 | -576.0846204741 | -574.5082201750 | -576.6085606536 |

---

Table S22: Root-mean-square deviation values (in hartree) obtained in the fitting of the ILJ  $\beta$  parameter using the CCSD(T)/aug-cc-pVQZ, CCSD(T)/aug-cc-pV5Z, and CCSD(T)/CBS electronic energies.

| Systems           | CCSD(T)/aug-cc-pVQZ   | CCSD(T)/aug-cc-pV5Z   | CCSD(T)/CBS            |
|-------------------|-----------------------|-----------------------|------------------------|
| He <sub>2</sub>   | 9.76x10 <sup>-8</sup> | 1.18x10 <sup>-7</sup> | 1.05 x10 <sup>-7</sup> |
| He-Ne             | 2.15x10 <sup>-7</sup> | 9.14x10 <sup>-8</sup> | 3.74 x10 <sup>-7</sup> |
| He-Ar             | 1.50x10 <sup>-7</sup> | 2.59x10 <sup>-7</sup> | 2.89 x10 <sup>-7</sup> |
| He-Kr             | 1.29x10 <sup>-7</sup> | 1.52x10 <sup>-7</sup> | 5.37 x10 <sup>-7</sup> |
| He-Xe             | 1.25x10 <sup>-7</sup> | 2.77x10 <sup>-7</sup> | 4.46 x10 <sup>-6</sup> |
| He-Rn             | 1.58x10 <sup>-7</sup> | 2.78x10 <sup>-7</sup> | 5.28 x10 <sup>-7</sup> |
| Ne <sub>2</sub>   | 2.12x10 <sup>-7</sup> | 3.58x10 <sup>-7</sup> | 1.36 x10 <sup>-6</sup> |
| Ne-Ar             | 4.70x10 <sup>-7</sup> | 5.35x10 <sup>-7</sup> | 8.91 x10 <sup>-7</sup> |
| Ne-Kr             | 3.69x10 <sup>-7</sup> | 5.67x10 <sup>-7</sup> | 2.45 x10 <sup>-6</sup> |
| Ne-Xe             | 5.39x10 <sup>-7</sup> | 7.67x10 <sup>-7</sup> | 1.10 x10 <sup>-5</sup> |
| Ne-Rn             | 5.09x10 <sup>-7</sup> | 9.21x10 <sup>-7</sup> | 1.06 x10 <sup>-6</sup> |
| Ar <sub>2</sub>   | 1.21x10 <sup>-6</sup> | 1.82x10 <sup>-6</sup> | 5.00 x10 <sup>-6</sup> |
| Ar-Kr             | 1.40x10 <sup>-6</sup> | 2.54x10 <sup>-6</sup> | 3.97 x10 <sup>-5</sup> |
| Ar-Xe             | 1.86x10 <sup>-6</sup> | 2.98x10 <sup>-6</sup> | 5.48 x10 <sup>-6</sup> |
| Ar-Rn             | 2.41x10 <sup>-6</sup> | 2.93x10 <sup>-6</sup> | 2.93 x10 <sup>-6</sup> |
| Kr-k <sub>r</sub> | 2.18x10 <sup>-6</sup> | 2.63x10 <sup>-6</sup> | 7.23 x10 <sup>-6</sup> |
| Kr-Xe             | 2.60x10 <sup>-6</sup> | 4.62x10 <sup>-6</sup> | 5.23 x10 <sup>-6</sup> |
| Kr-Rn             | 3.99x10 <sup>-6</sup> | 5.15x10 <sup>-6</sup> | 4.64 x10 <sup>-6</sup> |
| Xe <sub>2</sub>   | 4.22x10 <sup>-6</sup> | 4.90x10 <sup>-6</sup> | 5.95 x10 <sup>-6</sup> |
| Xe-Rn             | 4.23x10 <sup>-6</sup> | 6.19x10 <sup>-6</sup> | 7.08 x10 <sup>-6</sup> |
| Rn <sub>2</sub>   | 7.34x10 <sup>-6</sup> | 5.94x10 <sup>-6</sup> | 9.02 x10 <sup>-6</sup> |

Table S23: Ng-Ng molecule reduced mass values (atomic units).

| Systems         | Reduced mass | Systems         | Reduced mass |
|-----------------|--------------|-----------------|--------------|
| He <sub>2</sub> | 3647.5969    | Ar <sub>2</sub> | 36410.3449   |
| He-Ne           | 6088.5874    | Ar-Kr           | 49312.9086   |
| He-Ar           | 6631.8115    | Ar-Xe           | 55823.4657   |
| He-Kr           | 6963.6764    | Ar-Rn           | 61715.2761   |
| He-Xe           | 7080.2848    | Kr <sub>2</sub> | 76378.9653   |
| He-Rn           | 7167.0672    | Kr-Xe           | 93217.8628   |
| Ne <sub>2</sub> | 18392.0184   | Kr-Rn           | 110896.8626  |
| Ne-Ar           | 24439.0823   | Xe <sub>2</sub> | 119581.3872  |
| Ne-Kr           | 29645.4311   | Xe-Rn           | 150323.1481  |
| Ne-Xe           | 31880.6811   | Rn <sub>2</sub> | 202340.4570  |
| Ne-Rn           | 33719.0928   | —               | —            |

Table S24: Ne<sub>2</sub>, Ar<sub>2</sub>, Kr<sub>2</sub>, Xe<sub>2</sub>, and Rn<sub>2</sub> rovibrational energies (RE). The CBS acronym stands for the RE calculated with DVR method and a ILJ PEC with R<sub>e</sub> and D<sub>e</sub> determined at CCSD(T)/CBS level and  $\beta$  fitted from CCSD(T)/CBS electronic energies. The  $\beta$ 9-Exp acronym stands for RE determined by DVR method and a ILJ PEC with R<sub>e</sub>, D<sub>e</sub>,  $\beta$  (equal 9) experimental values.  $v$  and  $J$  represent the vibrational and rotational quantum numbers, respectively. The RE values are given in cm<sup>-1</sup>.

[illegible]

[illegible]

[illegible]



Table S25: He-Ne, He-Ar, He-Kr, He-Xe, He-Rn, Ne-Ar, Ne-Kr, Ne-Xe, Ne-Rn, Ar-Kr, Ar-Xe, Ar-Rn, Kr-Xe, Kr-Rn, and Xe-Rn rovibrational energies (RE). The CBS acronym stands for the RE calculated with DVR method and a ILJ PEC with  $R_e$  and  $D_e$  determined at CCSD(T)/CBS level and  $\beta$  fitted from CCSD(T)/CBS electronic energies. The  $\beta 9$  acronym stands for RE determined by DVR method and a ILJ PEC with  $R_e$  and  $D_e$  obtained at CCSD(T)/CBS level and  $\beta$  equal to 9 (Experimental value).  $v$  and  $J$  represent the vibrational and rotational quantum numbers, respectively. The RE values are given in  $\text{cm}^{-1}$ .

|     |     | He-Ne |           | He-Ar  |           | He-Kr  |           | He-Xe  |                |
|-----|-----|-------|-----------|--------|-----------|--------|-----------|--------|----------------|
| $v$ | $J$ | CBS   | $\beta 9$ | CBS    | $\beta 9$ | CBS    | $\beta 9$ | CBS    | $\beta 9$      |
| 0   | 0   | 12.48 | 12.16     | 13.65  | 13.67     | 12.95  | 13.09     | 13.16  | 12.14          |
| 0   | 1   | 13.20 | 12.88     | 15.75  | 15.78     | 13.47  | 13.61     | 14.69  | 13.73          |
|     |     | He-Rn |           | Ne-Ar  |           | Ne-Kr  |           | Ne-Xe  |                |
| $v$ | $J$ | CBS   | $\beta 9$ | CBS    | $\beta 9$ | CBS    | $\beta 9$ | CBS    | $\beta 9$      |
| 0   |     | 10.59 | -         | 12.82  | 12.46     | 11.67  | 11.42     | 10.87  | 10.62          |
| 1   |     | 18.72 | -         | 31.66  | 30.88     | 29.85  | 29.28     | 28.33  | 27.71          |
| 2   | 0   | 20.35 | -         | 42.31  | 41.41     | 41.66  | 40.92     | 40.43  | 39.60          |
| 3   |     | -     | -         | 46.55  | 45.66     | 47.97  | 47.15     | 47.77  | 46.80          |
| 4   |     | -     | -         | -      | -         | 50.58  | -         | 51.47  | 50.42          |
| 0   |     | 10.99 | -         | 13.51  | 13.14     | 12.19  | 11.94     | 10.99  | 10.74          |
| 1   |     | 18.88 | -         | 32.23  | 31.44     | 30.30  | 29.73     | 28.44  | 27.82          |
| 2   | 1   | 20.49 | -         | 42.73  | 41.82     | 42.03  | 41.29     | 40.52  | 39.69          |
| 3   |     | -     | -         | 46.80  | 45.91     | 48.24  | 47.42     | 47.84  | 46.88          |
| 4   |     | -     | -         | -      | -         | 50.77  | -         | 51.53  | 50.47          |
|     |     | Ne-Rn |           | Ar-Kr  |           | Ar-Xe  |           | Ar-Rn  |                |
| $v$ | $J$ | CBS   | $\beta 9$ | CBS    | $\beta 9$ | CBS    | $\beta 9$ | CBS    | $\beta 9$ -Exp |
| 0   |     | 3.32  | -         | 13.52  | 13.12     | 12.38  | 12.52     | 22.54  | -              |
| 1   |     | 20.54 | -         | 37.68  | 36.69     | 35.10  | 35.42     | 42.75  | -              |
| 2   |     | 33.00 | -         | 58.10  | 56.78     | 55.18  | 55.51     | 60.57  | -              |
| 3   |     | 41.04 | -         | 74.95  | 73.51     | 72.64  | 72.87     | 76.05  | -              |
| 4   |     | 45.35 | -         | 88.39  | 87.00     | 87.56  | 87.56     | 89.26  | -              |
| 5   |     | 46.99 | -         | 98.67  | 97.45     | 100.01 | 99.69     | 100.29 | -              |
| 6   |     | 47.62 | -         | 106.09 | 105.09    | 110.08 | 109.39    | 109.24 | -              |
| 7   |     | 48.50 | -         | 111.08 | 110.28    | 117.94 | 116.84    | 116.26 | -              |
| 8   |     | 49.69 | -         | 114.69 | 113.98    | 123.76 | 122.27    | 121.52 | -              |
| 9   |     | 51.13 | -         | -      | -         | 127.82 | 126.01    | 125.24 | -              |
| 10  |     | 52.83 | -         | -      | -         | 131.00 | 129.14    | 127.65 | -              |
| 11  | 0   | -     | -         | -      | -         | -      | -         | 129.04 | -              |
| 12  |     | -     | -         | -      | -         | -      | -         | 129.75 | -              |
| 13  |     | -     | -         | -      | -         | -      | -         | 130.43 | -              |
| 14  |     | -     | -         | -      | -         | -      | -         | 131.34 | -              |
| 15  |     | -     | -         | -      | -         | -      | -         | 132.45 | -              |
| 16  |     | -     | -         | -      | -         | -      | -         | 133.73 | -              |
| 17  |     | -     | -         | -      | -         | -      | -         | 135.19 | -              |
| 18  |     | -     | -         | -      | -         | -      | -         | 136.79 | -              |
| 19  |     | -     | -         | -      | -         | -      | -         | 138.54 | -              |
| 20  |     | -     | -         | -      | -         | -      | -         | 140.44 | -              |
| 0   |     | 3.32  | -         | 13.60  | 13.20     | 12.44  | 12.59     | 22.59  | -              |
| 1   |     | 20.54 | -         | 37.75  | 36.76     | 35.17  | 35.48     | 42.80  | -              |
| 2   |     | 33.00 | -         | 58.17  | 56.85     | 55.24  | 55.57     | 60.62  | -              |
| 3   |     | 41.04 | -         | 75.01  | 73.58     | 72.70  | 72.92     | 76.10  | -              |

|     |     |        |           |        |           |        |           |        |           |
|-----|-----|--------|-----------|--------|-----------|--------|-----------|--------|-----------|
| 4   |     | 45.35  | -         | 88.45  | 87.06     | 87.61  | 87.61     | 89.31  | -         |
| 5   |     | 46.99  | -         | 98.72  | 97.50     | 100.05 | 99.73     | 100.33 | -         |
| 6   |     | 47.62  | -         | 106.14 | 105.13    | 110.13 | 109.43    | 109.28 | -         |
| 7   |     | 48.50  | -         | 111.11 | 110.32    | 117.97 | 116.88    | 116.29 | -         |
| 8   |     | 49.69  | -         | 114.73 | 114.01    | 123.79 | 122.30    | 121.55 | -         |
| 9   |     | 51.13  | -         | -      | -         | 127.85 | 126.04    | 125.26 | -         |
| 10  |     | 52.83  | -         | -      | -         | 131.02 | 129.16    | 127.67 | -         |
| 11  | 1   | -      | -         | -      | -         | -      | -         | 129.05 | -         |
| 12  |     | -      | -         | -      | -         | -      | -         | 129.76 | -         |
| 13  |     | -      | -         | -      | -         | -      | -         | 130.44 | -         |
| 14  |     | -      | -         | -      | -         | -      | -         | 131.35 | -         |
| 15  |     | -      | -         | -      | -         | -      | -         | 132.46 | -         |
| 16  |     | -      | -         | -      | -         | -      | -         | 133.75 | -         |
| 17  |     | -      | -         | -      | -         | -      | -         | 135.20 | -         |
| 18  |     | -      | -         | -      | -         | -      | -         | 136.81 | -         |
| 19  |     | -      | -         | -      | -         | -      | -         | 138.56 | -         |
| 20  |     | -      | -         | -      | -         | -      | -         | 140.46 | -         |
|     |     | Kr-Xe  |           | Kr-Rn  |           | Xe-Rn  |           | -      |           |
| $v$ | $J$ | CBS    | $\beta 9$ |
| 0   |     | 10.48  | 10.63     | 15.98  | -         | 10.85  | -         | -      | -         |
| 1   |     | 30.25  | 30.66     | 33.65  | -         | 27.50  | -         | -      | -         |
| 2   |     | 48.48  | 49.07     | 50.05  | -         | 43.31  | -         | -      | -         |
| 3   |     | 65.16  | 65.89     | 65.18  | -         | 58.28  | -         | -      | -         |
| 4   |     | 80.33  | 81.13     | 79.06  | -         | 72.42  | -         | -      | -         |
| 5   |     | 94.01  | 94.84     | 91.72  | -         | 85.72  | -         | -      | -         |
| 6   |     | 106.22 | 107.04    | 103.18 | -         | 98.20  | -         | -      | -         |
| 7   |     | 117.00 | 117.78    | 113.45 | -         | 109.87 | -         | -      | -         |
| 8   |     | 126.40 | 127.09    | 122.58 | -         | 120.74 | -         | -      | -         |
| 9   |     | 134.46 | 135.04    | 130.59 | -         | 130.81 | -         | -      | -         |
| 10  |     | 141.24 | 141.70    | 137.53 | -         | 140.09 | -         | -      | -         |
| 11  |     | 146.83 | 147.15    | 143.45 | -         | 148.61 | -         | -      | -         |
| 12  |     | 151.30 | 151.48    | 148.41 | -         | 156.37 | -         | -      | -         |
| 13  |     | 154.77 | 154.81    | 152.48 | -         | 163.40 | -         | -      | -         |
| 14  |     | 157.34 | 157.26    | 155.73 | -         | 169.71 | -         | -      | -         |
| 15  |     | 159.23 | 159.06    | 158.23 | -         | 175.33 | -         | -      | -         |
| 16  |     | 160.99 | -         | 160.09 | -         | 180.28 | -         | -      | -         |
| 17  |     | -      | -         | 161.39 | -         | 184.60 | -         | -      | -         |
| 18  |     | -      | -         | 162.24 | -         | 188.31 | -         | -      | -         |
| 19  |     | -      | -         | 162.72 | -         | 191.47 | -         | -      | -         |
| 20  |     | -      | -         | 162.98 | -         | 194.09 | -         | -      | -         |
| 21  |     | -      | -         | 163.28 | -         | 196.24 | -         | -      | -         |
| 22  |     | -      | -         | 163.66 | -         | 197.95 | -         | -      | -         |
| 23  |     | -      | -         | 164.12 | -         | 199.27 | -         | -      | -         |
| 24  | 0   | -      | -         | 164.65 | -         | 200.25 | -         | -      | -         |
| 25  |     | -      | -         | 165.24 | -         | 200.93 | -         | -      | -         |
| 26  |     | -      | -         | 165.90 | -         | 201.38 | -         | -      | -         |
| 27  |     | -      | -         | 166.61 | -         | 201.65 | -         | -      | -         |
| 28  |     | -      | -         | 167.38 | -         | 201.91 | -         | -      | -         |
| 29  |     | -      | -         | 168.20 | -         | 202.25 | -         | -      | -         |
| 30  |     | -      | -         | 169.08 | -         | 202.65 | -         | -      | -         |
| 31  |     | -      | -         | 170.00 | -         | 203.11 | -         | -      | -         |
| 32  |     | -      | -         | 170.98 | -         | 203.63 | -         | -      | -         |
| 33  |     | -      | -         | 172.00 | -         | 204.19 | -         | -      | -         |
| 34  |     | -      | -         | 173.08 | -         | 204.81 | -         | -      | -         |

|    |        |        |        |   |        |   |   |   |
|----|--------|--------|--------|---|--------|---|---|---|
| 35 | -      | -      | 174.20 | - | 205.47 | - | - | - |
| 36 | -      | -      | 175.37 | - | 206.17 | - | - | - |
| 37 | -      | -      | -      | - | 206.92 | - | - | - |
| 38 | -      | -      | -      | - | 207.71 | - | - | - |
| 39 | -      | -      | -      | - | 208.53 | - | - | - |
| 40 | -      | -      | -      | - | 209.40 | - | - | - |
| 41 | -      | -      | -      | - | 210.31 | - | - | - |
| 42 | -      | -      | -      | - | 211.26 | - | - | - |
| 43 | -      | -      | -      | - | 212.25 | - | - | - |
| 44 | -      | -      | -      | - | 213.27 | - | - | - |
| 45 | -      | -      | -      | - | 214.33 | - | - | - |
| 46 | -      | -      | -      | - | 215.42 | - | - | - |
| 47 | -      | -      | -      | - | 216.55 | - | - | - |
|    |        |        |        |   |        |   |   |   |
| 0  | 10.61  | 10.76  | 16.01  | - | 10.87  | - | - | - |
| 1  | 30.38  | 30.78  | 33.68  | - | 27.52  | - | - | - |
| 2  | 48.60  | 49.19  | 50.07  | - | 43.33  | - | - | - |
| 3  | 65.28  | 66.00  | 65.21  | - | 58.30  | - | - | - |
| 4  | 80.44  | 81.25  | 79.09  | - | 72.43  | - | - | - |
| 5  | 94.12  | 94.95  | 91.75  | - | 85.74  | - | - | - |
| 6  | 106.32 | 107.15 | 103.20 | - | 98.22  | - | - | - |
| 7  | 117.10 | 117.87 | 113.48 | - | 109.89 | - | - | - |
| 8  | 126.49 | 127.18 | 122.60 | - | 120.75 | - | - | - |
| 9  | 134.55 | 135.13 | 130.61 | - | 130.82 | - | - | - |
| 10 | 141.33 | 141.78 | 137.55 | - | 140.11 | - | - | - |
| 11 | 146.90 | 147.22 | 143.47 | - | 148.62 | - | - | - |
| 12 | 151.37 | 151.55 | 148.43 | - | 156.38 | - | - | - |
| 13 | 154.83 | 154.87 | 152.49 | - | 163.41 | - | - | - |
| 14 | 157.40 | 157.31 | 155.74 | - | 169.72 | - | - | - |
| 15 | 159.27 | 159.11 | 158.25 | - | 175.34 | - | - | - |
| 16 | 161.04 | -      | 160.10 | - | 180.29 | - | - | - |
| 17 | -      | -      | 161.40 | - | 184.61 | - | - | - |
| 18 | -      | -      | 162.24 | - | 188.32 | - | - | - |
| 19 | -      | -      | 162.72 | - | 191.48 | - | - | - |
| 20 | -      | -      | 162.99 | - | 194.10 | - | - | - |
| 21 | -      | -      | 163.28 | - | 196.25 | - | - | - |
| 22 | -      | -      | 163.66 | - | 197.96 | - | - | - |
| 23 | -      | -      | 164.13 | - | 199.28 | - | - | - |
| 24 | 1      | -      | 164.66 | - | 200.25 | - | - | - |
| 25 | -      | -      | 165.25 | - | 200.94 | - | - | - |
| 26 | -      | -      | 165.90 | - | 201.38 | - | - | - |
| 27 | -      | -      | 166.62 | - | 201.66 | - | - | - |
| 28 | -      | -      | 167.39 | - | 201.92 | - | - | - |
| 29 | -      | -      | 168.21 | - | 202.25 | - | - | - |
| 30 | -      | -      | 169.08 | - | 202.65 | - | - | - |
| 31 | -      | -      | 170.01 | - | 203.11 | - | - | - |
| 32 | -      | -      | 170.98 | - | 203.63 | - | - | - |
| 33 | -      | -      | 172.01 | - | 204.20 | - | - | - |
| 34 | -      | -      | 173.08 | - | 204.81 | - | - | - |
| 35 | -      | -      | 174.20 | - | 205.47 | - | - | - |
| 36 | -      | -      | 175.37 | - | 206.17 | - | - | - |
| 37 | -      | -      | -      | - | 206.92 | - | - | - |
| 38 | -      | -      | -      | - | 207.71 | - | - | - |
| 39 | -      | -      | -      | - | 208.54 | - | - | - |

---

|    |   |   |   |        |   |   |   |
|----|---|---|---|--------|---|---|---|
| 40 | - | - | - | 209.41 | - | - | - |
| 41 | - | - | - | 210.32 | - | - | - |
| 42 | - | - | - | 211.26 | - | - | - |
| 43 | - | - | - | 212.25 | - | - | - |
| 44 | - | - | - | 213.27 | - | - | - |
| 45 | - | - | - | 214.33 | - | - | - |
| 46 | - | - | - | 215.43 | - | - | - |
| 47 | - | - | - | 216.56 | - | - | - |

---
